# Supplementary material
Source: publisher figshare collection journal article supplement (https://rs.figshare.com/ndownloader/files/13440869)
Supplement: Supplementary file 1 [file 13440869]

## Sheet: Metadata
	Supplementary Data for:
								Challenges and future prospects for developing
								Ca and Mg water quality guidelines: A meta-analysis
								by
								Sarah J. Bogart1*, Ali Azizishirazi2, and Greg G. Pyle1
								1Department of Biological Sciences, University of Lethbridge, 4401 University Drive, Lethbridge, Alberta, T1K 3M4, Canada; *Author for correspondence (sarah.bogart@uleth.ca)
								2British Columbia Ministry of Environment and Climate Change Strategy, 525 Superior Street, Victoria, British Columbia, V8V 1T7, Canada
	This excel sheet contains the following tabs (see main text for details):
		BC BKGD Condition Data <raw data for background water hardness and Ca:Mg ratio in British Columbia>
		Classified as secondary_R Data <collected articles that were considered secondary data sources post classification, in an R ready format>
		Classified as secondary_Referen <full citations for data presented in the 'Classified as secondary_R Data' tab>
		Classified as unacceptable <collected articles that were considered unacceptable sources with reasons why they were rejected during classification>
		Rejected by prelim screening <collected articles that were not included in the classification process with reasons why they were rejected during preliminary screening>

## Sheet: BC BKGD Condition Data
Region	EMS_ID	LOCATION NAME	LONGITUDE	LATITUDE	START DATE	Ca_D	Mg_D
Vancouver Island	121580	ENGLISHMAN R. AT HIGHWAY 19A	124.276	49.3011	2008-05-20 09:15:00	3.91	0.41
Vancouver Island	121580	ENGLISHMAN R. AT HIGHWAY 19A	124.276	49.3011	2008-03-11 09:10:00	4	0.44
Vancouver Island	121580	ENGLISHMAN R. AT HIGHWAY 19A	124.276	49.3011	2018-01-29 09:00:00	2.86	0.45
Vancouver Island	121580	ENGLISHMAN R. AT HIGHWAY 19A	124.276	49.3011	2007-12-04 09:10:00	2.92	0.46
Vancouver Island	121580	ENGLISHMAN R. AT HIGHWAY 19A	124.276	49.3011	2007-01-02 09:10:00	3	0.48
Vancouver Island	121580	ENGLISHMAN R. AT HIGHWAY 19A	124.276	49.3011	2007-03-13 13:45:00	3.38	0.48
Vancouver Island	121580	ENGLISHMAN R. AT HIGHWAY 19A	124.276	49.3011	2011-01-17 09:15:00	3.31	0.489
Vancouver Island	121580	ENGLISHMAN R. AT HIGHWAY 19A	124.276	49.3011	2010-10-26 09:13:00	3.69	0.52
Vancouver Island	121580	ENGLISHMAN R. AT HIGHWAY 19A	124.276	49.3011	2011-06-06 09:05:00	4.92	0.522
Vancouver Island	121580	ENGLISHMAN R. AT HIGHWAY 19A	124.276	49.3011	2015-12-07 09:00:00	3.5	0.54
Vancouver Island	121580	ENGLISHMAN R. AT HIGHWAY 19A	124.276	49.3011	2011-04-11 09:05:00	4.1	0.562
Vancouver Island	121580	ENGLISHMAN R. AT HIGHWAY 19A	124.276	49.3011	2006-01-17 09:15:00	3.34	0.58
Vancouver Island	121580	ENGLISHMAN R. AT HIGHWAY 19A	124.276	49.3011	2009-03-03 09:05:00	3.99	0.58
Vancouver Island	121580	ENGLISHMAN R. AT HIGHWAY 19A	124.276	49.3011	2009-03-03 09:20:00	4.01	0.58
Vancouver Island	121580	ENGLISHMAN R. AT HIGHWAY 19A	124.276	49.3011	2010-03-17 09:10:00	4.35	0.584
Vancouver Island	121580	ENGLISHMAN R. AT HIGHWAY 19A	124.276	49.3011	2013-05-06 09:36:00	5.74	0.589
Vancouver Island	121580	ENGLISHMAN R. AT HIGHWAY 19A	124.276	49.3011	2017-03-14	4.03	0.59
Vancouver Island	121580	ENGLISHMAN R. AT HIGHWAY 19A	124.276	49.3011	2016-02-15 09:10:00	4.17	0.59
Vancouver Island	121580	ENGLISHMAN R. AT HIGHWAY 19A	124.276	49.3011	2005-01-18 09:45:00	3.72	0.6
Vancouver Island	121580	ENGLISHMAN R. AT HIGHWAY 19A	124.276	49.3011	1996-03-11 15:00:00	3.94	0.6
Vancouver Island	121580	ENGLISHMAN R. AT HIGHWAY 19A	124.276	49.3011	2011-03-14 09:16:00	3.12	0.609
Vancouver Island	121580	ENGLISHMAN R. AT HIGHWAY 19A	124.276	49.3011	2017-11-20 09:00:00	3.58	0.61
Vancouver Island	121580	ENGLISHMAN R. AT HIGHWAY 19A	124.276	49.3011	2016-01-18 09:15:00	3.89	0.61
Vancouver Island	121580	ENGLISHMAN R. AT HIGHWAY 19A	124.276	49.3011	2007-10-23 09:15:00	5.43	0.61
Vancouver Island	121580	ENGLISHMAN R. AT HIGHWAY 19A	124.276	49.3011	2018-05-07 08:45:00	5.67	0.61
Vancouver Island	121580	ENGLISHMAN R. AT HIGHWAY 19A	124.276	49.3011	2012-01-30 09:20:00	3.94	0.613
Vancouver Island	121580	ENGLISHMAN R. AT HIGHWAY 19A	124.276	49.3011	2012-11-19 08:56:00	4.49	0.616
Vancouver Island	121580	ENGLISHMAN R. AT HIGHWAY 19A	124.276	49.3011	2012-12-03 09:00:00	3.86	0.619
Vancouver Island	121580	ENGLISHMAN R. AT HIGHWAY 19A	124.276	49.3011	2015-01-19 07:55:00	3.98	0.619
Vancouver Island	121580	ENGLISHMAN R. AT HIGHWAY 19A	124.276	49.3011	2006-01-03 09:10:00	3.52	0.62
Vancouver Island	121580	ENGLISHMAN R. AT HIGHWAY 19A	124.276	49.3011	2006-05-23 09:15:00	5.45	0.62
Vancouver Island	121580	ENGLISHMAN R. AT HIGHWAY 19A	124.276	49.3011	2017-05-23	6.02	0.62
Vancouver Island	121580	ENGLISHMAN R. AT HIGHWAY 19A	124.276	49.3011	2007-02-13 09:55:00	4.58	0.63
Vancouver Island	121580	ENGLISHMAN R. AT HIGHWAY 19A	124.276	49.3011	2013-04-08 10:23:00	5	0.63
Vancouver Island	121580	ENGLISHMAN R. AT HIGHWAY 19A	124.276	49.3011	2007-06-05 09:15:00	5.91	0.63
Vancouver Island	121580	ENGLISHMAN R. AT HIGHWAY 19A	124.276	49.3011	2009-11-17 09:20:00	3.4	0.64
Vancouver Island	121580	ENGLISHMAN R. AT HIGHWAY 19A	124.276	49.3011	2010-01-19 09:20:00	3.91	0.64
Vancouver Island	121580	ENGLISHMAN R. AT HIGHWAY 19A	124.276	49.3011	2017-03-27 09:30:00	4	0.64
Vancouver Island	121580	ENGLISHMAN R. AT HIGHWAY 19A	124.276	49.3011	2007-12-18 09:15:00	4.64	0.64
Vancouver Island	121580	ENGLISHMAN R. AT HIGHWAY 19A	124.276	49.3011	2007-03-27 09:05:00	4.66	0.64
Vancouver Island	121580	ENGLISHMAN R. AT HIGHWAY 19A	124.276	49.3011	2009-04-14	4.68	0.64
Vancouver Island	121580	ENGLISHMAN R. AT HIGHWAY 19A	124.276	49.3011	1987-11-24 09:30:00	5.11	0.64
Vancouver Island	121580	ENGLISHMAN R. AT HIGHWAY 19A	124.276	49.3011	2010-02-16 09:10:00	4.39	0.65
Vancouver Island	121580	ENGLISHMAN R. AT HIGHWAY 19A	124.276	49.3011	1999-05-19 08:15:00	4.8	0.65
Vancouver Island	121580	ENGLISHMAN R. AT HIGHWAY 19A	124.276	49.3011	2008-05-06 09:15:00	5.53	0.65
Vancouver Island	121580	ENGLISHMAN R. AT HIGHWAY 19A	124.276	49.3011	2010-04-27 09:35:00	5.53	0.659
Vancouver Island	121580	ENGLISHMAN R. AT HIGHWAY 19A	124.276	49.3011	1996-02-20 09:40:00	3.96	0.66
Vancouver Island	121580	ENGLISHMAN R. AT HIGHWAY 19A	124.276	49.3011	2016-11-21	4.64	0.66
Vancouver Island	121580	ENGLISHMAN R. AT HIGHWAY 19A	124.276	49.3011	2007-05-08 08:50:00	5.9	0.66
Vancouver Island	121580	ENGLISHMAN R. AT HIGHWAY 19A	124.276	49.3011	2012-02-13 09:15:00	4.35	0.662
Vancouver Island	121580	ENGLISHMAN R. AT HIGHWAY 19A	124.276	49.3011	2011-05-24 08:35:00	5.63	0.663
Vancouver Island	121580	ENGLISHMAN R. AT HIGHWAY 19A	124.276	49.3011	2011-02-14 09:24:00	4.2	0.665
Vancouver Island	121580	ENGLISHMAN R. AT HIGHWAY 19A	124.276	49.3011	2011-06-20 09:15:00	6.13	0.667
Vancouver Island	121580	ENGLISHMAN R. AT HIGHWAY 19A	124.276	49.3011	2011-07-04 09:35:00	6.52	0.678
Vancouver Island	121580	ENGLISHMAN R. AT HIGHWAY 19A	124.276	49.3011	2014-03-10 09:00:00	3.95	0.68
Vancouver Island	121580	ENGLISHMAN R. AT HIGHWAY 19A	124.276	49.3011	2005-05-24 10:10:00	4.87	0.68
Vancouver Island	121580	ENGLISHMAN R. AT HIGHWAY 19A	124.276	49.3011	2007-04-10 09:10:00	5.24	0.68
Vancouver Island	121580	ENGLISHMAN R. AT HIGHWAY 19A	124.276	49.3011	2008-06-03 09:05:00	6.07	0.68
Vancouver Island	121580	ENGLISHMAN R. AT HIGHWAY 19A	124.276	49.3011	1999-12-14 15:40:00	4.1	0.69
Vancouver Island	121580	ENGLISHMAN R. AT HIGHWAY 19A	124.276	49.3011	2017-04-24 09:30:00	4.93	0.69
Vancouver Island	121580	ENGLISHMAN R. AT HIGHWAY 19A	124.276	49.3011	2010-11-01 09:10:00	5.2	0.69
Vancouver Island	121580	ENGLISHMAN R. AT HIGHWAY 19A	124.276	49.3011	2014-01-13	4.57	0.694
Vancouver Island	121580	ENGLISHMAN R. AT HIGHWAY 19A	124.276	49.3011	2011-10-11 08:55:00	6.37	0.697
Vancouver Island	121580	ENGLISHMAN R. AT HIGHWAY 19A	124.276	49.3011	2008-01-16 09:10:00	4.13	0.7
Vancouver Island	121580	ENGLISHMAN R. AT HIGHWAY 19A	124.276	49.3011	2009-05-12 09:10:00	5.85	0.7
Vancouver Island	121580	ENGLISHMAN R. AT HIGHWAY 19A	124.276	49.3011	2001-11-06 07:45:00	6.6	0.7
Vancouver Island	121580	ENGLISHMAN R. AT HIGHWAY 19A	124.276	49.3011	2011-05-09 08:15:00	5.46	0.704
Vancouver Island	121580	ENGLISHMAN R. AT HIGHWAY 19A	124.276	49.3011	2012-11-05 09:02:00	5.65	0.704
Vancouver Island	121580	ENGLISHMAN R. AT HIGHWAY 19A	124.276	49.3011	2015-03-16 08:56:00	5.03	0.708
Vancouver Island	121580	ENGLISHMAN R. AT HIGHWAY 19A	124.276	49.3011	2006-12-19 09:15:00	4.56	0.71
Vancouver Island	121580	ENGLISHMAN R. AT HIGHWAY 19A	124.276	49.3011	2017-10-23 09:00:00	5.91	0.71
Vancouver Island	121580	ENGLISHMAN R. AT HIGHWAY 19A	124.276	49.3011	2008-02-12 09:10:00	4.8	0.72
Vancouver Island	121580	ENGLISHMAN R. AT HIGHWAY 19A	124.276	49.3011	2006-11-14 09:15:00	4.84	0.72
Vancouver Island	121580	ENGLISHMAN R. AT HIGHWAY 19A	124.276	49.3011	2006-04-25 09:15:00	5.53	0.72
Vancouver Island	121580	ENGLISHMAN R. AT HIGHWAY 19A	124.276	49.3011	2005-04-19 09:20:00	4.89	0.73
Vancouver Island	121580	ENGLISHMAN R. AT HIGHWAY 19A	124.276	49.3011	2010-03-29 09:12:00	4.44	0.736
Vancouver Island	121580	ENGLISHMAN R. AT HIGHWAY 19A	124.276	49.3011	2006-01-31 09:15:00	4.21	0.74
Vancouver Island	121580	ENGLISHMAN R. AT HIGHWAY 19A	124.276	49.3011	2009-11-24 09:15:00	4.22	0.74
Vancouver Island	121580	ENGLISHMAN R. AT HIGHWAY 19A	124.276	49.3011	2017-05-08	5.91	0.74
Vancouver Island	121580	ENGLISHMAN R. AT HIGHWAY 19A	124.276	49.3011	2015-11-09 09:10:00	6.11	0.74
Vancouver Island	121580	ENGLISHMAN R. AT HIGHWAY 19A	124.276	49.3011	2007-05-22 09:10:00	6.31	0.74
Vancouver Island	121580	ENGLISHMAN R. AT HIGHWAY 19A	124.276	49.3011	2008-06-17 09:10:00	6.74	0.74
Vancouver Island	121580	ENGLISHMAN R. AT HIGHWAY 19A	124.276	49.3011	2008-07-02 09:15:00	6.98	0.74
Vancouver Island	121580	ENGLISHMAN R. AT HIGHWAY 19A	124.276	49.3011	2013-02-25 09:05:00	4.51	0.741
Vancouver Island	121580	ENGLISHMAN R. AT HIGHWAY 19A	124.276	49.3011	2014-12-01 09:22:00	5.18	0.746
Vancouver Island	121580	ENGLISHMAN R. AT HIGHWAY 19A	124.276	49.3011	2014-04-22 08:56:00	5.83	0.746
Vancouver Island	121580	ENGLISHMAN R. AT HIGHWAY 19A	124.276	49.3011	2017-04-10 09:00:00	4.53	0.75
Vancouver Island	121580	ENGLISHMAN R. AT HIGHWAY 19A	124.276	49.3011	2006-04-11 09:15:00	5.33	0.75
Vancouver Island	121580	ENGLISHMAN R. AT HIGHWAY 19A	124.276	49.3011	2010-11-08 09:15:00	5.33	0.75
Vancouver Island	121580	ENGLISHMAN R. AT HIGHWAY 19A	124.276	49.3011	2018-05-22 08:00:00	6.39	0.75
Vancouver Island	121580	ENGLISHMAN R. AT HIGHWAY 19A	124.276	49.3011	2009-05-26 09:10:00	7.01	0.75
Vancouver Island	121580	ENGLISHMAN R. AT HIGHWAY 19A	124.276	49.3011	2011-01-31 09:10:00	5.24	0.751
Vancouver Island	121580	ENGLISHMAN R. AT HIGHWAY 19A	124.276	49.3011	2016-03-14 09:08:00	4.23	0.76
Vancouver Island	121580	ENGLISHMAN R. AT HIGHWAY 19A	124.276	49.3011	2016-02-01 09:08:00	4.58	0.76
Vancouver Island	121580	ENGLISHMAN R. AT HIGHWAY 19A	124.276	49.3011	2006-03-28 09:45:00	4.85	0.76
Vancouver Island	121580	ENGLISHMAN R. AT HIGHWAY 19A	124.276	49.3011	2005-04-05 09:35:00	4.89	0.76
Vancouver Island	121580	ENGLISHMAN R. AT HIGHWAY 19A	124.276	49.3011	2013-04-22 09:45:00	5.89	0.76
Vancouver Island	121580	ENGLISHMAN R. AT HIGHWAY 19A	124.276	49.3011	2006-05-09 09:15:00	6.3	0.76
Vancouver Island	121580	ENGLISHMAN R. AT HIGHWAY 19A	124.276	49.3011	2006-06-06 09:05:00	6.99	0.76
Vancouver Island	121580	ENGLISHMAN R. AT HIGHWAY 19A	124.276	49.3011	2012-03-12 09:12:00	4.62	0.762
Vancouver Island	121580	ENGLISHMAN R. AT HIGHWAY 19A	124.276	49.3011	2015-12-21 10:00:00	4.43	0.77
Vancouver Island	121580	ENGLISHMAN R. AT HIGHWAY 19A	124.276	49.3011	2018-01-15 09:00:00	4.82	0.77
Vancouver Island	121580	ENGLISHMAN R. AT HIGHWAY 19A	124.276	49.3011	2010-03-02 09:15:00	5.04	0.77
Vancouver Island	121580	ENGLISHMAN R. AT HIGHWAY 19A	124.276	49.3011	2009-04-28 09:25:00	6.15	0.77
Vancouver Island	121580	ENGLISHMAN R. AT HIGHWAY 19A	124.276	49.3011	2014-10-20 08:57:00	6.58	0.773
Vancouver Island	121580	ENGLISHMAN R. AT HIGHWAY 19A	124.276	49.3011	2017-01-30 09:10:00	5.24	0.78
Vancouver Island	121580	ENGLISHMAN R. AT HIGHWAY 19A	124.276	49.3011	2005-02-01 11:15:00	5.34	0.78
Vancouver Island	121580	ENGLISHMAN R. AT HIGHWAY 19A	124.276	49.3011	2014-05-05 09:05:00	6.46	0.78
Vancouver Island	121580	ENGLISHMAN R. AT HIGHWAY 19A	124.276	49.3011	2010-05-25 09:10:00	6.25	0.784
Vancouver Island	121580	ENGLISHMAN R. AT HIGHWAY 19A	124.276	49.3011	2016-02-29 09:08:00	5.25	0.79
Vancouver Island	121580	ENGLISHMAN R. AT HIGHWAY 19A	124.276	49.3011	2014-12-01 09:13:00	5.36	0.79
Vancouver Island	121580	ENGLISHMAN R. AT HIGHWAY 19A	124.276	49.3011	2004-11-09 11:54:00	5.9	0.79
Vancouver Island	121580	ENGLISHMAN R. AT HIGHWAY 19A	124.276	49.3011	2010-09-27 09:15:00	7.1	0.797
Vancouver Island	121580	ENGLISHMAN R. AT HIGHWAY 19A	124.276	49.3011	2007-11-20 09:15:00	5.06	0.8
Vancouver Island	121580	ENGLISHMAN R. AT HIGHWAY 19A	124.276	49.3011	2017-12-04 09:00:00	4.74	0.81
Vancouver Island	121580	ENGLISHMAN R. AT HIGHWAY 19A	124.276	49.3011	2017-06-05 09:05:00	7.02	0.81
Vancouver Island	121580	ENGLISHMAN R. AT HIGHWAY 19A	124.276	49.3011	2013-05-21 09:44:00	7.01	0.814
Vancouver Island	121580	ENGLISHMAN R. AT HIGHWAY 19A	124.276	49.3011	2010-04-12 08:50:00	4.9	0.816
Vancouver Island	121580	ENGLISHMAN R. AT HIGHWAY 19A	124.276	49.3011	2007-01-30 09:15:00	5.25	0.82
Vancouver Island	121580	ENGLISHMAN R. AT HIGHWAY 19A	124.276	49.3011	2016-10-24 09:00:00	5.78	0.82
Vancouver Island	121580	ENGLISHMAN R. AT HIGHWAY 19A	124.276	49.3011	2007-10-09 09:10:00	6.53	0.82
Vancouver Island	121580	ENGLISHMAN R. AT HIGHWAY 19A	124.276	49.3011	2015-02-16 08:55:00	5.5	0.822
Vancouver Island	121580	ENGLISHMAN R. AT HIGHWAY 19A	124.276	49.3011	2012-04-10 09:10:00	5.29	0.825
Vancouver Island	121580	ENGLISHMAN R. AT HIGHWAY 19A	124.276	49.3011	2005-11-08 09:25:00	5.75	0.83
Vancouver Island	121580	ENGLISHMAN R. AT HIGHWAY 19A	124.276	49.3011	2009-01-20 09:07:00	5.98	0.83
Vancouver Island	121580	ENGLISHMAN R. AT HIGHWAY 19A	124.276	49.3011	2012-02-27 09:15:00	5.09	0.836
Vancouver Island	121580	ENGLISHMAN R. AT HIGHWAY 19A	124.276	49.3011	2014-05-20 09:00:00	7.36	0.838
Vancouver Island	121580	ENGLISHMAN R. AT HIGHWAY 19A	124.276	49.3011	2016-04-12 09:05:00	6.75	0.84
Vancouver Island	121580	ENGLISHMAN R. AT HIGHWAY 19A	124.276	49.3011	2013-03-25 09:00:00	5.49	0.842
Vancouver Island	121580	ENGLISHMAN R. AT HIGHWAY 19A	124.276	49.3011	2011-10-24 09:43:00	7.64	0.849
Vancouver Island	121580	ENGLISHMAN R. AT HIGHWAY 19A	124.276	49.3011	2005-11-22 09:50:00	6.2	0.85
Vancouver Island	121580	ENGLISHMAN R. AT HIGHWAY 19A	124.276	49.3011	2015-11-23	6.45	0.85
Vancouver Island	121580	ENGLISHMAN R. AT HIGHWAY 19A	124.276	49.3011	2013-06-03 09:00:00	6.9	0.855
Vancouver Island	121580	ENGLISHMAN R. AT HIGHWAY 19A	124.276	49.3011	2010-01-05 10:22:00	5.25	0.86
Vancouver Island	121580	ENGLISHMAN R. AT HIGHWAY 19A	124.276	49.3011	2004-12-20 10:20:00	5.57	0.86
Vancouver Island	121580	ENGLISHMAN R. AT HIGHWAY 19A	124.276	49.3011	2004-11-23 10:50:00	5.9	0.86
Vancouver Island	121580	ENGLISHMAN R. AT HIGHWAY 19A	124.276	49.3011	2014-04-07 09:00:00	6.01	0.86
Vancouver Island	121580	ENGLISHMAN R. AT HIGHWAY 19A	124.276	49.3011	2007-04-24 09:15:00	6.22	0.86
Vancouver Island	121580	ENGLISHMAN R. AT HIGHWAY 19A	124.276	49.3011	2011-07-18 09:10:00	7.26	0.86
Vancouver Island	121580	ENGLISHMAN R. AT HIGHWAY 19A	124.276	49.3011	2008-10-08 09:10:00	7.69	0.86
Vancouver Island	121580	ENGLISHMAN R. AT HIGHWAY 19A	124.276	49.3011	2010-06-07 14:00:00	6.26	0.864
Vancouver Island	121580	ENGLISHMAN R. AT HIGHWAY 19A	124.276	49.3011	2010-05-12 09:10:00	7.23	0.866
Vancouver Island	121580	ENGLISHMAN R. AT HIGHWAY 19A	124.276	49.3011	2010-12-20 09:15:00	5.45	0.867
Vancouver Island	121580	ENGLISHMAN R. AT HIGHWAY 19A	124.276	49.3011	2017-02-14	5.35	0.87
Vancouver Island	121580	ENGLISHMAN R. AT HIGHWAY 19A	124.276	49.3011	2007-02-28 09:10:00	5.43	0.87
Vancouver Island	121580	ENGLISHMAN R. AT HIGHWAY 19A	124.276	49.3011	2007-06-19 09:15:00	7.99	0.87
Vancouver Island	121580	ENGLISHMAN R. AT HIGHWAY 19A	124.276	49.3011	2014-12-15 09:10:00	5.57	0.877
Vancouver Island	121580	ENGLISHMAN R. AT HIGHWAY 19A	124.276	49.3011	2005-03-21 14:10:00	5.2	0.88
Vancouver Island	121580	ENGLISHMAN R. AT HIGHWAY 19A	124.276	49.3011	2006-03-14 09:14:00	5.26	0.88
Vancouver Island	121580	ENGLISHMAN R. AT HIGHWAY 19A	124.276	49.3011	2016-03-28 09:10:00	5.85	0.88
Vancouver Island	121580	ENGLISHMAN R. AT HIGHWAY 19A	124.276	49.3011	2005-11-29 14:10:00	6.22	0.88
Vancouver Island	121580	ENGLISHMAN R. AT HIGHWAY 19A	124.276	49.3011	2013-07-02 08:50:00	7.58	0.88
Vancouver Island	121580	ENGLISHMAN R. AT HIGHWAY 19A	124.276	49.3011	2008-11-05 09:10:00	7.69	0.88
Vancouver Island	121580	ENGLISHMAN R. AT HIGHWAY 19A	124.276	49.3011	2014-11-03	6.85	0.887
Vancouver Island	121580	ENGLISHMAN R. AT HIGHWAY 19A	124.276	49.3011	2008-02-26 09:10:00	6.11	0.89
Vancouver Island	121580	ENGLISHMAN R. AT HIGHWAY 19A	124.276	49.3011	2010-06-22 10:16:00	7.38	0.891
Vancouver Island	121580	ENGLISHMAN R. AT HIGHWAY 19A	124.276	49.3011	2013-02-12 09:10:00	5.16	0.895
Vancouver Island	121580	ENGLISHMAN R. AT HIGHWAY 19A	124.276	49.3011	2018-04-23 08:00:00	6.1	0.9
Vancouver Island	121580	ENGLISHMAN R. AT HIGHWAY 19A	124.276	49.3011	2017-12-18 09:00:00	6.94	0.9
Vancouver Island	121580	ENGLISHMAN R. AT HIGHWAY 19A	124.276	49.3011	2005-05-03 09:15:00	7.03	0.9
Vancouver Island	121580	ENGLISHMAN R. AT HIGHWAY 19A	124.276	49.3011	2008-10-21 09:35:00	8.04	0.9
Vancouver Island	121580	ENGLISHMAN R. AT HIGHWAY 19A	124.276	49.3011	2011-03-28 09:05:00	5.37	0.902
Vancouver Island	121580	ENGLISHMAN R. AT HIGHWAY 19A	124.276	49.3011	2006-02-28 09:10:00	5.75	0.91
Vancouver Island	121580	ENGLISHMAN R. AT HIGHWAY 19A	124.276	49.3011	2010-02-02 09:20:00	5.77	0.91
Vancouver Island	121580	ENGLISHMAN R. AT HIGHWAY 19A	124.276	49.3011	2016-04-25 08:35:00	7.11	0.91
Vancouver Island	121580	ENGLISHMAN R. AT HIGHWAY 19A	124.276	49.3011	1996-02-26 15:30:00	4.97	0.92
Vancouver Island	121580	ENGLISHMAN R. AT HIGHWAY 19A	124.276	49.3011	2007-12-11 09:15:00	5.69	0.92
Vancouver Island	121580	ENGLISHMAN R. AT HIGHWAY 19A	124.276	49.3011	2008-03-25 09:05:00	6.37	0.92
Vancouver Island	121580	ENGLISHMAN R. AT HIGHWAY 19A	124.276	49.3011	2008-11-18 09:15:00	6.84	0.92
Vancouver Island	121580	ENGLISHMAN R. AT HIGHWAY 19A	124.276	49.3011	2009-10-27 09:10:00	8.34	0.92
Vancouver Island	121580	ENGLISHMAN R. AT HIGHWAY 19A	124.276	49.3011	2006-06-20 08:45:00	8.56	0.92
Vancouver Island	121580	ENGLISHMAN R. AT HIGHWAY 19A	124.276	49.3011	2011-08-02 09:20:00	8.38	0.923
Vancouver Island	121580	ENGLISHMAN R. AT HIGHWAY 19A	124.276	49.3011	2012-03-26	5.68	0.928
Vancouver Island	121580	ENGLISHMAN R. AT HIGHWAY 19A	124.276	49.3011	2008-04-22 09:10:00	6.63	0.93
Vancouver Island	121580	ENGLISHMAN R. AT HIGHWAY 19A	124.276	49.3011	2013-03-11 09:06:00	6.14	0.935
Vancouver Island	121580	ENGLISHMAN R. AT HIGHWAY 19A	124.276	49.3011	2017-06-19 09:00:00	7.95	0.94
Vancouver Island	121580	ENGLISHMAN R. AT HIGHWAY 19A	124.276	49.3011	2009-06-09 09:10:00	8.1	0.94
Vancouver Island	121580	ENGLISHMAN R. AT HIGHWAY 19A	124.276	49.3011	2011-04-25 08:20:00	6.49	0.941
Vancouver Island	121580	ENGLISHMAN R. AT HIGHWAY 19A	124.276	49.3011	2013-01-28 09:49:00	5.99	0.944
Vancouver Island	121580	ENGLISHMAN R. AT HIGHWAY 19A	124.276	49.3011	2007-01-16 09:20:00	5.62	0.95
Vancouver Island	121580	ENGLISHMAN R. AT HIGHWAY 19A	124.276	49.3011	2018-02-13 09:00:00	5.91	0.95
Vancouver Island	121580	ENGLISHMAN R. AT HIGHWAY 19A	124.276	49.3011	2015-02-02 08:55:00	6.92	0.951
Vancouver Island	121580	ENGLISHMAN R. AT HIGHWAY 19A	124.276	49.3011	2010-12-06 09:10:00	5.9	0.954
Vancouver Island	121580	ENGLISHMAN R. AT HIGHWAY 19A	124.276	49.3011	2013-01-14 09:15:00	5.45	0.957
Vancouver Island	121580	ENGLISHMAN R. AT HIGHWAY 19A	124.276	49.3011	2013-11-18 09:01:00	7.03	0.958
Vancouver Island	121580	ENGLISHMAN R. AT HIGHWAY 19A	124.276	49.3011	2009-03-31 09:10:00	6.36	0.96
Vancouver Island	121580	ENGLISHMAN R. AT HIGHWAY 19A	124.276	49.3011	2018-06-18 09:23:00	8.13	0.96
Vancouver Island	121580	ENGLISHMAN R. AT HIGHWAY 19A	124.276	49.3011	2014-01-06 09:08:00	7.41	0.963
Vancouver Island	121580	ENGLISHMAN R. AT HIGHWAY 19A	124.276	49.3011	2012-01-16 09:10:00	6.39	0.967
Vancouver Island	121580	ENGLISHMAN R. AT HIGHWAY 19A	124.276	49.3011	2013-10-07 09:09:00	8.93	0.975
Vancouver Island	121580	ENGLISHMAN R. AT HIGHWAY 19A	124.276	49.3011	2011-01-04 09:10:00	5.88	0.978
Vancouver Island	121580	ENGLISHMAN R. AT HIGHWAY 19A	124.276	49.3011	2018-01-02 09:00:00	6.09	0.98
Vancouver Island	121580	ENGLISHMAN R. AT HIGHWAY 19A	124.276	49.3011	2010-11-22 09:43:00	6.78	0.984
Vancouver Island	121580	ENGLISHMAN R. AT HIGHWAY 19A	124.276	49.3011	2008-04-08 09:15:00	6.68	0.99
Vancouver Island	121580	ENGLISHMAN R. AT HIGHWAY 19A	124.276	49.3011	2015-04-13 09:10:00	7.13	0.995
Vancouver Island	121580	ENGLISHMAN R. AT HIGHWAY 19A	124.276	49.3011	2013-06-17 09:06:00	8.38	1.01
Vancouver Island	121580	ENGLISHMAN R. AT HIGHWAY 19A	124.276	49.3011	2016-05-09 08:40:00	8.31	1.02
Vancouver Island	121580	ENGLISHMAN R. AT HIGHWAY 19A	124.276	49.3011	2008-12-02 09:15:00	8.37	1.02
Vancouver Island	121580	ENGLISHMAN R. AT HIGHWAY 19A	124.276	49.3011	2006-02-14 09:15:00	5.96	1.03
Vancouver Island	121580	ENGLISHMAN R. AT HIGHWAY 19A	124.276	49.3011	2018-06-04 09:00:00	8.18	1.03
Vancouver Island	121580	ENGLISHMAN R. AT HIGHWAY 19A	124.276	49.3011	2010-07-06 18:00:00	8.61	1.03
Vancouver Island	121580	ENGLISHMAN R. AT HIGHWAY 19A	124.276	49.3011	2004-12-07 09:20:00	6.06	1.04
Vancouver Island	121580	ENGLISHMAN R. AT HIGHWAY 19A	124.276	49.3011	2009-12-08 09:20:00	6.81	1.04
Vancouver Island	121580	ENGLISHMAN R. AT HIGHWAY 19A	124.276	49.3011	2012-10-22 09:00:00	8.55	1.04
Vancouver Island	121580	ENGLISHMAN R. AT HIGHWAY 19A	124.276	49.3011	2007-07-03 09:08:00	9.14	1.04
Vancouver Island	121580	ENGLISHMAN R. AT HIGHWAY 19A	124.276	49.3011	2017-02-27	6.3	1.05
Vancouver Island	121580	ENGLISHMAN R. AT HIGHWAY 19A	124.276	49.3011	2015-01-05 08:55:00	6.55	1.05
Vancouver Island	121580	ENGLISHMAN R. AT HIGHWAY 19A	124.276	49.3011	2014-06-02 09:05:00	8.32	1.05
Vancouver Island	121580	ENGLISHMAN R. AT HIGHWAY 19A	124.276	49.3011	2013-01-07 09:10:00	6.19	1.06
Vancouver Island	121580	ENGLISHMAN R. AT HIGHWAY 19A	124.276	49.3011	2014-01-27 09:00:00	7.79	1.06
Vancouver Island	121580	ENGLISHMAN R. AT HIGHWAY 19A	124.276	49.3011	2016-06-06 09:10:00	8.8	1.06
Vancouver Island	121580	ENGLISHMAN R. AT HIGHWAY 19A	124.276	49.3011	2018-03-12	6.47	1.07
Vancouver Island	121580	ENGLISHMAN R. AT HIGHWAY 19A	124.276	49.3011	2006-07-25 08:45:00	10.1	1.07
Vancouver Island	121580	ENGLISHMAN R. AT HIGHWAY 19A	124.276	49.3011	2005-01-04 10:15:00	6.4	1.08
Vancouver Island	121580	ENGLISHMAN R. AT HIGHWAY 19A	124.276	49.3011	2018-03-26 08:00:00	6.84	1.08
Vancouver Island	121580	ENGLISHMAN R. AT HIGHWAY 19A	124.276	49.3011	2000-11-15 12:40:00	7.6	1.08
Vancouver Island	121580	ENGLISHMAN R. AT HIGHWAY 19A	124.276	49.3011	2008-01-30 09:10:00	6.86	1.09
Vancouver Island	121580	ENGLISHMAN R. AT HIGHWAY 19A	124.276	49.3011	2009-02-03 09:15:00	7.26	1.09
Vancouver Island	121580	ENGLISHMAN R. AT HIGHWAY 19A	124.276	49.3011	2007-11-27 09:15:00	7.64	1.09
Vancouver Island	121580	ENGLISHMAN R. AT HIGHWAY 19A	124.276	49.3011	2014-11-17	8.28	1.09
Vancouver Island	121580	ENGLISHMAN R. AT HIGHWAY 19A	124.276	49.3011	2011-11-07 09:00:00	8.63	1.09
Vancouver Island	121580	ENGLISHMAN R. AT HIGHWAY 19A	124.276	49.3011	2014-02-24	5.88	1.1
Vancouver Island	121580	ENGLISHMAN R. AT HIGHWAY 19A	124.276	49.3011	2017-07-04 09:00:00	8.92	1.11
Vancouver Island	121580	ENGLISHMAN R. AT HIGHWAY 19A	124.276	49.3011	2015-03-02 08:55:00	6.51	1.12
Vancouver Island	121580	ENGLISHMAN R. AT HIGHWAY 19A	124.276	49.3011	2015-04-27 09:05:00	7.59	1.12
Vancouver Island	121580	ENGLISHMAN R. AT HIGHWAY 19A	124.276	49.3011	2006-08-16 09:15:00	9.46	1.12
Vancouver Island	121580	ENGLISHMAN R. AT HIGHWAY 19A	124.276	49.3011	2013-11-04 09:08:00	7.73	1.13
Vancouver Island	121580	ENGLISHMAN R. AT HIGHWAY 19A	124.276	49.3011	2007-11-06 09:15:00	8.65	1.13
Vancouver Island	121580	ENGLISHMAN R. AT HIGHWAY 19A	124.276	49.3011	2015-09-28	10.2	1.13
Vancouver Island	121580	ENGLISHMAN R. AT HIGHWAY 19A	124.276	49.3011	2008-01-02 09:15:00	6.84	1.14
Vancouver Island	121580	ENGLISHMAN R. AT HIGHWAY 19A	124.276	49.3011	2012-12-17 09:05:00	6.55	1.15
Vancouver Island	121580	ENGLISHMAN R. AT HIGHWAY 19A	124.276	49.3011	2005-02-15 09:55:00	6.86	1.15
Vancouver Island	121580	ENGLISHMAN R. AT HIGHWAY 19A	124.276	49.3011	2006-07-11 08:45:00	10.4	1.15
Vancouver Island	121580	ENGLISHMAN R. AT HIGHWAY 19A	124.276	49.3011	2011-02-28 09:05:00	6.45	1.16
Vancouver Island	121580	ENGLISHMAN R. AT HIGHWAY 19A	124.276	49.3011	2005-06-07 09:20:00	9.34	1.16
Vancouver Island	121580	ENGLISHMAN R. AT HIGHWAY 19A	124.276	49.3011	2007-07-17 09:15:00	9.38	1.16
Vancouver Island	121580	ENGLISHMAN R. AT HIGHWAY 19A	124.276	49.3011	2012-09-24 09:35:00	9.44	1.16
Vancouver Island	121580	ENGLISHMAN R. AT HIGHWAY 19A	124.276	49.3011	2005-10-11 09:20:00	11.2	1.16
Vancouver Island	121580	ENGLISHMAN R. AT HIGHWAY 19A	124.276	49.3011	2006-12-05	7.02	1.17
Vancouver Island	121580	ENGLISHMAN R. AT HIGHWAY 19A	124.276	49.3011	2009-02-17 09:10:00	7.61	1.17
Vancouver Island	121580	ENGLISHMAN R. AT HIGHWAY 19A	124.276	49.3011	2010-07-20 09:47:00	9.24	1.17
Vancouver Island	121580	ENGLISHMAN R. AT HIGHWAY 19A	124.276	49.3011	2008-08-26 09:10:00	9.78	1.17
Vancouver Island	121580	ENGLISHMAN R. AT HIGHWAY 19A	124.276	49.3011	2006-08-01 09:15:00	10.1	1.17
Vancouver Island	121580	ENGLISHMAN R. AT HIGHWAY 19A	124.276	49.3011	1996-03-04 15:00:00	5.94	1.18
Vancouver Island	121580	ENGLISHMAN R. AT HIGHWAY 19A	124.276	49.3011	2012-08-13 09:00:00	9.77	1.18
Vancouver Island	121580	ENGLISHMAN R. AT HIGHWAY 19A	124.276	49.3011	2009-03-17 09:10:00	6.59	1.19
Vancouver Island	121580	ENGLISHMAN R. AT HIGHWAY 19A	124.276	49.3011	2016-12-19	6.97	1.19
Vancouver Island	121580	ENGLISHMAN R. AT HIGHWAY 19A	124.276	49.3011	2009-12-14 12:02:00	7.81	1.2
Vancouver Island	121580	ENGLISHMAN R. AT HIGHWAY 19A	124.276	49.3011	2006-08-08 09:15:00	10.6	1.2
Vancouver Island	121580	ENGLISHMAN R. AT HIGHWAY 19A	124.276	49.3011	2013-08-12 09:12:00	9.65	1.21
Vancouver Island	121580	ENGLISHMAN R. AT HIGHWAY 19A	124.276	49.3011	2018-07-30 08:00:00	9.88	1.21
Vancouver Island	121580	ENGLISHMAN R. AT HIGHWAY 19A	124.276	49.3011	2013-09-23 09:21:00	10.2	1.21
Vancouver Island	121580	ENGLISHMAN R. AT HIGHWAY 19A	124.276	49.3011	2008-09-23 09:35:00	10	1.22
Vancouver Island	121580	ENGLISHMAN R. AT HIGHWAY 19A	124.276	49.3011	2018-02-26 09:00:00	6.91	1.23
Vancouver Island	121580	ENGLISHMAN R. AT HIGHWAY 19A	124.276	49.3011	2010-08-03 09:45:00	9.28	1.23
Vancouver Island	121580	ENGLISHMAN R. AT HIGHWAY 19A	124.276	49.3011	2016-05-24 09:05:00	9.84	1.23
Vancouver Island	121580	ENGLISHMAN R. AT HIGHWAY 19A	124.276	49.3011	2016-08-29 09:22:00	9.97	1.23
Vancouver Island	121580	ENGLISHMAN R. AT HIGHWAY 19A	124.276	49.3011	2017-08-14 08:00:00	10.2	1.23
Vancouver Island	121580	ENGLISHMAN R. AT HIGHWAY 19A	124.276	49.3011	2016-01-04 09:15:00	7.58	1.24
Vancouver Island	121580	ENGLISHMAN R. AT HIGHWAY 19A	124.276	49.3011	2005-12-20 09:15:00	8.98	1.24
Vancouver Island	121580	ENGLISHMAN R. AT HIGHWAY 19A	124.276	49.3011	2011-08-15 09:10:00	9.22	1.25
Vancouver Island	121580	ENGLISHMAN R. AT HIGHWAY 19A	124.276	49.3011	2010-08-23 09:12:00	9.58	1.25
Vancouver Island	121580	ENGLISHMAN R. AT HIGHWAY 19A	124.276	49.3011	2008-07-15 09:15:00	9.76	1.25
Vancouver Island	121580	ENGLISHMAN R. AT HIGHWAY 19A	124.276	49.3011	2005-10-25 09:15:00	10.9	1.25
Vancouver Island	121580	ENGLISHMAN R. AT HIGHWAY 19A	124.276	49.3011	2011-09-12 09:15:00	9.89	1.26
Vancouver Island	121580	ENGLISHMAN R. AT HIGHWAY 19A	124.276	49.3011	2012-09-10	9.95	1.26
Vancouver Island	121580	ENGLISHMAN R. AT HIGHWAY 19A	124.276	49.3011	2014-02-11 09:17:00	8.94	1.27
Vancouver Island	121580	ENGLISHMAN R. AT HIGHWAY 19A	124.276	49.3011	2012-08-27	9.64	1.27
Vancouver Island	121580	ENGLISHMAN R. AT HIGHWAY 19A	124.276	49.3011	2013-12-02 09:15:00	9.05	1.28
Vancouver Island	121580	ENGLISHMAN R. AT HIGHWAY 19A	124.276	49.3011	2009-06-23 09:15:00	9.56	1.28
Vancouver Island	121580	ENGLISHMAN R. AT HIGHWAY 19A	124.276	49.3011	2005-06-21 09:15:00	10.1	1.28
Vancouver Island	121580	ENGLISHMAN R. AT HIGHWAY 19A	124.276	49.3011	2012-07-30 09:10:00	9.97	1.29
Vancouver Island	121580	ENGLISHMAN R. AT HIGHWAY 19A	124.276	49.3011	2007-07-31 09:15:00	10.4	1.29
Vancouver Island	121580	ENGLISHMAN R. AT HIGHWAY 19A	124.276	49.3011	2005-03-01 10:15:00	9.15	1.3
Vancouver Island	121580	ENGLISHMAN R. AT HIGHWAY 19A	124.276	49.3011	2013-12-16 09:06:00	9.31	1.3
Vancouver Island	121580	ENGLISHMAN R. AT HIGHWAY 19A	124.276	49.3011	2005-12-06 09:15:00	9.58	1.3
Vancouver Island	121580	ENGLISHMAN R. AT HIGHWAY 19A	124.276	49.3011	2010-08-30 09:04:00	9.75	1.3
Vancouver Island	121580	ENGLISHMAN R. AT HIGHWAY 19A	124.276	49.3011	2018-07-16 09:00:00	9.98	1.3
Vancouver Island	121580	ENGLISHMAN R. AT HIGHWAY 19A	124.276	49.3011	2018-08-27	10	1.3
Vancouver Island	121580	ENGLISHMAN R. AT HIGHWAY 19A	124.276	49.3011	2006-08-23 09:15:00	11.5	1.3
Vancouver Island	121580	ENGLISHMAN R. AT HIGHWAY 19A	124.276	49.3011	2008-12-16 09:20:00	8.68	1.32
Vancouver Island	121580	ENGLISHMAN R. AT HIGHWAY 19A	124.276	49.3011	2013-07-15 09:09:00	10.1	1.32
Vancouver Island	121580	ENGLISHMAN R. AT HIGHWAY 19A	124.276	49.3011	2014-07-14 09:05:00	10.1	1.32
Vancouver Island	121580	ENGLISHMAN R. AT HIGHWAY 19A	124.276	49.3011	2010-09-07 09:09:00	9.14	1.33
Vancouver Island	121580	ENGLISHMAN R. AT HIGHWAY 19A	124.276	49.3011	2014-07-28 09:17:00	11	1.33
Vancouver Island	121580	ENGLISHMAN R. AT HIGHWAY 19A	124.276	49.3011	2010-08-16 09:47:00	10.3	1.34
Vancouver Island	121580	ENGLISHMAN R. AT HIGHWAY 19A	124.276	49.3011	2016-08-02 08:45:00	10.7	1.34
Vancouver Island	121580	ENGLISHMAN R. AT HIGHWAY 19A	124.276	49.3011	2005-08-16 09:20:00	11.8	1.34
Vancouver Island	121580	ENGLISHMAN R. AT HIGHWAY 19A	124.276	49.3011	2014-08-11 09:00:00	10.5	1.35
Vancouver Island	121580	ENGLISHMAN R. AT HIGHWAY 19A	124.276	49.3011	2005-09-14 08:15:00	11.6	1.35
Vancouver Island	121580	ENGLISHMAN R. AT HIGHWAY 19A	124.276	49.3011	2017-08-28 09:00:00	10.5	1.36
Vancouver Island	121580	ENGLISHMAN R. AT HIGHWAY 19A	124.276	49.3011	2011-08-29 09:05:00	10.8	1.36
Vancouver Island	121580	ENGLISHMAN R. AT HIGHWAY 19A	124.276	49.3011	2013-07-29	9.66	1.37
Vancouver Island	121580	ENGLISHMAN R. AT HIGHWAY 19A	124.276	49.3011	2018-08-13 09:00:00	10.6	1.37
Vancouver Island	121580	ENGLISHMAN R. AT HIGHWAY 19A	124.276	49.3011	2009-08-31 09:09:00	11.2	1.37
Vancouver Island	121580	ENGLISHMAN R. AT HIGHWAY 19A	124.276	49.3011	2017-01-16 09:00:00	8.33	1.38
Vancouver Island	121580	ENGLISHMAN R. AT HIGHWAY 19A	124.276	49.3011	2016-09-12	10.4	1.38
Vancouver Island	121580	ENGLISHMAN R. AT HIGHWAY 19A	124.276	49.3011	2017-07-17 08:00:00	10.8	1.38
Vancouver Island	121580	ENGLISHMAN R. AT HIGHWAY 19A	124.276	49.3011	2005-08-23 09:20:00	11.7	1.38
Vancouver Island	121580	ENGLISHMAN R. AT HIGHWAY 19A	124.276	49.3011	2005-08-09 14:45:00	11.9	1.38
Vancouver Island	121580	ENGLISHMAN R. AT HIGHWAY 19A	124.276	49.3011	2016-08-15 09:00:00	11.1	1.4
Vancouver Island	121580	ENGLISHMAN R. AT HIGHWAY 19A	124.276	49.3011	2015-10-26	11.6	1.4
Vancouver Island	121580	ENGLISHMAN R. AT HIGHWAY 19A	124.276	49.3011	2013-08-26	10.3	1.41
Vancouver Island	121580	ENGLISHMAN R. AT HIGHWAY 19A	124.276	49.3011	2018-07-03	10.1	1.42
Vancouver Island	121580	ENGLISHMAN R. AT HIGHWAY 19A	124.276	49.3011	2017-09-11 09:05:00	10.2	1.42
Vancouver Island	121580	ENGLISHMAN R. AT HIGHWAY 19A	124.276	49.3011	2009-08-04 09:15:00	11.3	1.42
Vancouver Island	121580	ENGLISHMAN R. AT HIGHWAY 19A	124.276	49.3011	2007-09-11 09:25:00	11.5	1.42
Vancouver Island	121580	ENGLISHMAN R. AT HIGHWAY 19A	124.276	49.3011	2007-09-18 09:30:00	11.8	1.42
Vancouver Island	121580	ENGLISHMAN R. AT HIGHWAY 19A	124.276	49.3011	2017-07-31	10.6	1.43
Vancouver Island	121580	ENGLISHMAN R. AT HIGHWAY 19A	124.276	49.3011	2008-08-12 09:30:00	11.3	1.43
Vancouver Island	121580	ENGLISHMAN R. AT HIGHWAY 19A	124.276	49.3011	2013-10-21 09:07:00	10.7	1.44
Vancouver Island	121580	ENGLISHMAN R. AT HIGHWAY 19A	124.276	49.3011	2007-09-25 09:15:00	12.3	1.45
Vancouver Island	121580	ENGLISHMAN R. AT HIGHWAY 19A	124.276	49.3011	2010-09-15 09:05:00	10.6	1.46
Vancouver Island	121580	ENGLISHMAN R. AT HIGHWAY 19A	124.276	49.3011	2009-09-15 09:20:00	11.2	1.46
Vancouver Island	121580	ENGLISHMAN R. AT HIGHWAY 19A	124.276	49.3011	2007-08-14 09:25:00	11.5	1.46
Vancouver Island	121580	ENGLISHMAN R. AT HIGHWAY 19A	124.276	49.3011	2007-08-28 09:40:00	11.6	1.46
Vancouver Island	121580	ENGLISHMAN R. AT HIGHWAY 19A	124.276	49.3011	2009-07-21 09:25:00	11.4	1.47
Vancouver Island	121580	ENGLISHMAN R. AT HIGHWAY 19A	124.276	49.3011	2015-05-11 09:10:00	9.42	1.49
Vancouver Island	121580	ENGLISHMAN R. AT HIGHWAY 19A	124.276	49.3011	2014-09-22 09:00:00	10.6	1.49
Vancouver Island	121580	ENGLISHMAN R. AT HIGHWAY 19A	124.276	49.3011	2014-09-08 09:05:00	11.4	1.51
Vancouver Island	121580	ENGLISHMAN R. AT HIGHWAY 19A	124.276	49.3011	2014-08-25 09:05:00	10.5	1.52
Vancouver Island	121580	ENGLISHMAN R. AT HIGHWAY 19A	124.276	49.3011	2015-07-06	11.7	1.53
Vancouver Island	121580	ENGLISHMAN R. AT HIGHWAY 19A	124.276	49.3011	2016-09-26	11.9	1.53
Vancouver Island	121580	ENGLISHMAN R. AT HIGHWAY 19A	124.276	49.3011	2015-06-22 09:10:00	12.2	1.53
Vancouver Island	121580	ENGLISHMAN R. AT HIGHWAY 19A	124.276	49.3011	2009-07-07 10:50:00	11.6	1.54
Vancouver Island	121580	ENGLISHMAN R. AT HIGHWAY 19A	124.276	49.3011	2009-01-06 09:20:00	8.56	1.55
Vancouver Island	121580	ENGLISHMAN R. AT HIGHWAY 19A	124.276	49.3011	2005-09-28 09:20:00	13.2	1.55
Vancouver Island	121580	ENGLISHMAN R. AT HIGHWAY 19A	124.276	49.3011	2012-10-09 09:15:00	10.8	1.56
Vancouver Island	121580	ENGLISHMAN R. AT HIGHWAY 19A	124.276	49.3011	2016-07-04 08:37:00	11.4	1.56
Vancouver Island	121580	ENGLISHMAN R. AT HIGHWAY 19A	124.276	49.3011	2009-08-18 09:15:00	12	1.56
Vancouver Island	121580	ENGLISHMAN R. AT HIGHWAY 19A	124.276	49.3011	2014-10-06 08:55:00	11.7	1.57
Vancouver Island	121580	ENGLISHMAN R. AT HIGHWAY 19A	124.276	49.3011	2005-08-02 09:15:00	13.4	1.57
Vancouver Island	121580	ENGLISHMAN R. AT HIGHWAY 19A	124.276	49.3011	2006-09-19 09:15:00	14.2	1.57
Vancouver Island	121580	ENGLISHMAN R. AT HIGHWAY 19A	124.276	49.3011	2009-09-29 09:12:00	12	1.58
Vancouver Island	121580	ENGLISHMAN R. AT HIGHWAY 19A	124.276	49.3011	2015-08-31 09:10:00	13.5	1.58
Vancouver Island	121580	ENGLISHMAN R. AT HIGHWAY 19A	124.276	49.3011	2015-05-25 09:25:00	11	1.6
Vancouver Island	121580	ENGLISHMAN R. AT HIGHWAY 19A	124.276	49.3011	2008-07-29 09:10:00	12.1	1.6
Vancouver Island	121580	ENGLISHMAN R. AT HIGHWAY 19A	124.276	49.3011	2005-07-19 10:35:00	12.9	1.62
Vancouver Island	121580	ENGLISHMAN R. AT HIGHWAY 19A	124.276	49.3011	2016-06-20 09:10:00	12	1.63
Vancouver Island	121580	ENGLISHMAN R. AT HIGHWAY 19A	124.276	49.3011	2015-07-20 09:55:00	12.6	1.63
Vancouver Island	121580	ENGLISHMAN R. AT HIGHWAY 19A	124.276	49.3011	2017-09-25 09:00:00	12	1.65
Vancouver Island	121580	ENGLISHMAN R. AT HIGHWAY 19A	124.276	49.3011	2015-08-17	12.8	1.65
Vancouver Island	121580	ENGLISHMAN R. AT HIGHWAY 19A	124.276	49.3011	2016-07-18	12.4	1.68
Vancouver Island	121580	ENGLISHMAN R. AT HIGHWAY 19A	124.276	49.3011	2005-07-26 09:15:00	13.2	1.69
Vancouver Island	121580	ENGLISHMAN R. AT HIGHWAY 19A	124.276	49.3011	2006-10-31 09:25:00	14.3	1.69
Vancouver Island	121580	ENGLISHMAN R. AT HIGHWAY 19A	124.276	49.3011	2017-11-06 09:10:00	11	1.72
Vancouver Island	121580	ENGLISHMAN R. AT HIGHWAY 19A	124.276	49.3011	2015-08-04 08:30:00	13	1.73
Vancouver Island	121580	ENGLISHMAN R. AT HIGHWAY 19A	124.276	49.3011	2015-06-08 08:55:00	12.6	1.74
Vancouver Island	121580	ENGLISHMAN R. AT HIGHWAY 19A	124.276	49.3011	2005-07-05 09:15:00	12.8	1.75
Vancouver Island	121580	ENGLISHMAN R. AT HIGHWAY 19A	124.276	49.3011	2015-09-14 09:10:00	13.6	1.79
Vancouver Island	121580	ENGLISHMAN R. AT HIGHWAY 19A	124.276	49.3011	2006-10-03 09:40:00	14.4	1.79
Vancouver Island	121580	ENGLISHMAN R. AT HIGHWAY 19A	124.276	49.3011	2006-10-17 09:45:00	14.5	1.82
Vancouver Island	121580	ENGLISHMAN R. AT HIGHWAY 19A	124.276	49.3011	2017-10-10 09:20:00	13.6	1.99
Vancouver Island	121580	ENGLISHMAN R. AT HIGHWAY 19A	124.276	49.3011	2009-10-13 09:07:00	14.5	2.02
Vancouver Island	124784	MC-M1	125.624	49.5669	1984-10-10 13:30:00	2.73	0.07
Vancouver Island	124784	MC-M1	125.624	49.5669	2016-05-25	2.39	0.107
Vancouver Island	124784	MC-M1	125.624	49.5669	1983-08-26 13:00:00	3.42	0.13
Vancouver Island	124784	MC-M1	125.624	49.5669	1984-09-24 14:00:00	4.77	0.13
Vancouver Island	124784	MC-M1	125.624	49.5669	2016-05-10	2.96	0.133
Vancouver Island	124784	MC-M1	125.624	49.5669	2017-08-09 10:40:00	3.28	0.134
Vancouver Island	124784	MC-M1	125.624	49.5669	1983-06-29 12:15:00	2.13	0.14
Vancouver Island	124784	MC-M1	125.624	49.5669	1983-10-27 10:00:00	2.86	0.14
Vancouver Island	124784	MC-M1	125.624	49.5669	1985-10-24 11:00:00	4.58	0.14
Vancouver Island	124784	MC-M1	125.624	49.5669	2017-05-10	3.72	0.15
Vancouver Island	124784	MC-M1	125.624	49.5669	2018-08-01 10:30:00	4.17	0.153
Vancouver Island	124784	MC-M1	125.624	49.5669	2016-08-10	3.97	0.16
Vancouver Island	124784	MC-M1	125.624	49.5669	2015-01-26	3.81	0.162
Vancouver Island	124784	MC-M1	125.624	49.5669	2015-05-12	3.76	0.163
Vancouver Island	124784	MC-M1	125.624	49.5669	1982-10-26 11:00:00	2.31	0.17
Vancouver Island	124784	MC-M1	125.624	49.5669	2016-02-17	3.9	0.176
Vancouver Island	124784	MC-M1	125.624	49.5669	1983-02-15 12:20:00	3.32	0.18
Vancouver Island	124784	MC-M1	125.624	49.5669	2016-11-16	4.46	0.183
Vancouver Island	124784	MC-M1	125.624	49.5669	2017-08-28 08:50:00	4.99	0.183
Vancouver Island	124784	MC-M1	125.624	49.5669	2015-02-11	4.16	0.186
Vancouver Island	124784	MC-M1	125.624	49.5669	1984-01-04 12:00:00	2.1	0.19
Vancouver Island	124784	MC-M1	125.624	49.5669	2015-08-11	4.92	0.195
Vancouver Island	124784	MC-M1	125.624	49.5669	1983-01-12 10:00:00	3.28	0.2
Vancouver Island	124784	MC-M1	125.624	49.5669	2015-03-24	4.4	0.2
Vancouver Island	124784	MC-M1	125.624	49.5669	1984-02-29 13:05:00	4.27	0.21
Vancouver Island	124784	MC-M1	125.624	49.5669	2015-06-10	5.72	0.217
Vancouver Island	124784	MC-M1	125.624	49.5669	1985-09-09 12:05:00	5.13	0.22
Vancouver Island	124784	MC-M1	125.624	49.5669	2015-11-03	5.56	0.227
Vancouver Island	124784	MC-M1	125.624	49.5669	1986-04-16 13:00:00	5.39	0.23
Vancouver Island	124784	MC-M1	125.624	49.5669	1983-04-11	5.69	0.23
Vancouver Island	124784	MC-M1	125.624	49.5669	2015-12-01	5.79	0.233
Vancouver Island	124784	MC-M1	125.624	49.5669	1984-03-27 12:00:00	5.79	0.24
Vancouver Island	124784	MC-M1	125.624	49.5669	2015-11-10	5.82	0.244
Vancouver Island	124784	MC-M1	125.624	49.5669	2015-09-29	21.2	0.265
Vancouver Island	124784	MC-M1	125.624	49.5669	2015-11-24	6.75	0.27
Vancouver Island	124784	MC-M1	125.624	49.5669	2015-10-28	6.84	0.273
Vancouver Island	124784	MC-M1	125.624	49.5669	1984-12-11 12:00:00	4.2	0.28
Vancouver Island	124784	MC-M1	125.624	49.5669	2017-02-07	7.05	0.287
Vancouver Island	124784	MC-M1	125.624	49.5669	2015-07-20	6.9	0.294
Vancouver Island	124784	MC-M1	125.624	49.5669	2018-02-21 13:30:00	7.1	0.294
Vancouver Island	124784	MC-M1	125.624	49.5669	1984-01-19 14:10:00	7.36	0.31
Vancouver Island	124784	MC-M1	125.624	49.5669	2017-11-08 10:40:00	7.75	0.361
Vancouver Island	124784	MC-M1	125.624	49.5669	2018-05-02	9.36	0.744
Vancouver Island	124784	MC-M1	125.624	49.5669	1991-10-08 11:30:00	51.8	1.69
Vancouver Island	124784	MC-M1	125.624	49.5669	2015-09-29	6.12	1.95
Vancouver Island	126402	QUINSAM RIV. U/S MIDDLE QUINSAM LK AT ARGONAUT ROAD (PE-07008)	125.509	49.93	1996-11-27 11:15:00	4.35	0.555
Vancouver Island	126402	QUINSAM RIV. U/S MIDDLE QUINSAM LK AT ARGONAUT ROAD (PE-07008)	125.509	49.93	1997-03-17 14:10:00	5.6	0.6
Vancouver Island	126402	QUINSAM RIV. U/S MIDDLE QUINSAM LK AT ARGONAUT ROAD (PE-07008)	125.509	49.93	1997-03-17 14:10:00	5.6	0.6
Vancouver Island	126402	QUINSAM RIV. U/S MIDDLE QUINSAM LK AT ARGONAUT ROAD (PE-07008)	125.509	49.93	1997-03-17 14:10:00	5.6	0.6
Vancouver Island	126402	QUINSAM RIV. U/S MIDDLE QUINSAM LK AT ARGONAUT ROAD (PE-07008)	125.509	49.93	1997-03-17 14:10:00	5.6	0.6
Vancouver Island	126402	QUINSAM RIV. U/S MIDDLE QUINSAM LK AT ARGONAUT ROAD (PE-07008)	125.509	49.93	1997-03-03 14:35:00	5.7	0.6
Vancouver Island	126402	QUINSAM RIV. U/S MIDDLE QUINSAM LK AT ARGONAUT ROAD (PE-07008)	125.509	49.93	1997-03-03 14:35:00	5.7	0.6
Vancouver Island	126402	QUINSAM RIV. U/S MIDDLE QUINSAM LK AT ARGONAUT ROAD (PE-07008)	125.509	49.93	1997-03-03 14:35:00	5.7	0.6
Vancouver Island	126402	QUINSAM RIV. U/S MIDDLE QUINSAM LK AT ARGONAUT ROAD (PE-07008)	125.509	49.93	2000-04-13 09:05:00	5.7	0.6
Vancouver Island	126402	QUINSAM RIV. U/S MIDDLE QUINSAM LK AT ARGONAUT ROAD (PE-07008)	125.509	49.93	1999-09-15 08:55:00	6.4	0.615
Vancouver Island	126402	QUINSAM RIV. U/S MIDDLE QUINSAM LK AT ARGONAUT ROAD (PE-07008)	125.509	49.93	2017-04-24 12:00:00	6.14	0.649
Vancouver Island	126402	QUINSAM RIV. U/S MIDDLE QUINSAM LK AT ARGONAUT ROAD (PE-07008)	125.509	49.93	2010-11-01 12:00:00	4.88	0.66
Vancouver Island	126402	QUINSAM RIV. U/S MIDDLE QUINSAM LK AT ARGONAUT ROAD (PE-07008)	125.509	49.93	1999-06-17 11:40:00	6.5	0.661
Vancouver Island	126402	QUINSAM RIV. U/S MIDDLE QUINSAM LK AT ARGONAUT ROAD (PE-07008)	125.509	49.93	2011-11-02 12:20:00	5.97	0.669
Vancouver Island	126402	QUINSAM RIV. U/S MIDDLE QUINSAM LK AT ARGONAUT ROAD (PE-07008)	125.509	49.93	2017-10-23	5.66	0.673
Vancouver Island	126402	QUINSAM RIV. U/S MIDDLE QUINSAM LK AT ARGONAUT ROAD (PE-07008)	125.509	49.93	2000-04-11	6.35	0.673
Vancouver Island	126402	QUINSAM RIV. U/S MIDDLE QUINSAM LK AT ARGONAUT ROAD (PE-07008)	125.509	49.93	2007-11-18 13:00:00	16.1939	0.68
Vancouver Island	126402	QUINSAM RIV. U/S MIDDLE QUINSAM LK AT ARGONAUT ROAD (PE-07008)	125.509	49.93	2012-07-04 09:10:00	6.13	0.689
Vancouver Island	126402	QUINSAM RIV. U/S MIDDLE QUINSAM LK AT ARGONAUT ROAD (PE-07008)	125.509	49.93	1999-04-15 08:30:00	6.3	0.69
Vancouver Island	126402	QUINSAM RIV. U/S MIDDLE QUINSAM LK AT ARGONAUT ROAD (PE-07008)	125.509	49.93	2007-10-21 13:05:00	15.4233	0.69
Vancouver Island	126402	QUINSAM RIV. U/S MIDDLE QUINSAM LK AT ARGONAUT ROAD (PE-07008)	125.509	49.93	2017-04-04 12:00:00	6.42	0.692
Vancouver Island	126402	QUINSAM RIV. U/S MIDDLE QUINSAM LK AT ARGONAUT ROAD (PE-07008)	125.509	49.93	2015-10-21	6.32	0.698
Vancouver Island	126402	QUINSAM RIV. U/S MIDDLE QUINSAM LK AT ARGONAUT ROAD (PE-07008)	125.509	49.93	1997-02-25 13:00:00	5.6	0.7
Vancouver Island	126402	QUINSAM RIV. U/S MIDDLE QUINSAM LK AT ARGONAUT ROAD (PE-07008)	125.509	49.93	1997-03-10 14:05:00	5.8	0.7
Vancouver Island	126402	QUINSAM RIV. U/S MIDDLE QUINSAM LK AT ARGONAUT ROAD (PE-07008)	125.509	49.93	1997-03-10 14:05:00	5.8	0.7
Vancouver Island	126402	QUINSAM RIV. U/S MIDDLE QUINSAM LK AT ARGONAUT ROAD (PE-07008)	125.509	49.93	1997-03-10 14:05:00	5.8	0.7
Vancouver Island	126402	QUINSAM RIV. U/S MIDDLE QUINSAM LK AT ARGONAUT ROAD (PE-07008)	125.509	49.93	1997-04-01 14:20:00	5.8	0.7
Vancouver Island	126402	QUINSAM RIV. U/S MIDDLE QUINSAM LK AT ARGONAUT ROAD (PE-07008)	125.509	49.93	1997-02-04 13:00:00	6.2	0.7
Vancouver Island	126402	QUINSAM RIV. U/S MIDDLE QUINSAM LK AT ARGONAUT ROAD (PE-07008)	125.509	49.93	1981-02-25 12:55:00	6.4	0.7
Vancouver Island	126402	QUINSAM RIV. U/S MIDDLE QUINSAM LK AT ARGONAUT ROAD (PE-07008)	125.509	49.93	2018-07-24	6.89	0.703
Vancouver Island	126402	QUINSAM RIV. U/S MIDDLE QUINSAM LK AT ARGONAUT ROAD (PE-07008)	125.509	49.93	2017-04-12 12:00:00	5.97	0.705
Vancouver Island	126402	QUINSAM RIV. U/S MIDDLE QUINSAM LK AT ARGONAUT ROAD (PE-07008)	125.509	49.93	2018-04-25	6.97	0.705
Vancouver Island	126402	QUINSAM RIV. U/S MIDDLE QUINSAM LK AT ARGONAUT ROAD (PE-07008)	125.509	49.93	2016-10-18 12:00:00	5.96	0.707
Vancouver Island	126402	QUINSAM RIV. U/S MIDDLE QUINSAM LK AT ARGONAUT ROAD (PE-07008)	125.509	49.93	2016-10-12 12:00:00	6.03	0.707
Vancouver Island	126402	QUINSAM RIV. U/S MIDDLE QUINSAM LK AT ARGONAUT ROAD (PE-07008)	125.509	49.93	1989-12-11 10:30:00	6.28	0.71
Vancouver Island	126402	QUINSAM RIV. U/S MIDDLE QUINSAM LK AT ARGONAUT ROAD (PE-07008)	125.509	49.93	2010-08-31 08:25:00	6.58	0.71
Vancouver Island	126402	QUINSAM RIV. U/S MIDDLE QUINSAM LK AT ARGONAUT ROAD (PE-07008)	125.509	49.93	2018-05-01	6.5	0.711
Vancouver Island	126402	QUINSAM RIV. U/S MIDDLE QUINSAM LK AT ARGONAUT ROAD (PE-07008)	125.509	49.93	2016-11-10 12:00:00	6.61	0.712
Vancouver Island	126402	QUINSAM RIV. U/S MIDDLE QUINSAM LK AT ARGONAUT ROAD (PE-07008)	125.509	49.93	2016-10-26 12:00:00	6.85	0.712
Vancouver Island	126402	QUINSAM RIV. U/S MIDDLE QUINSAM LK AT ARGONAUT ROAD (PE-07008)	125.509	49.93	2016-04-12 12:00:00	6.84	0.714
Vancouver Island	126402	QUINSAM RIV. U/S MIDDLE QUINSAM LK AT ARGONAUT ROAD (PE-07008)	125.509	49.93	2014-10-22	5.21	0.715
Vancouver Island	126402	QUINSAM RIV. U/S MIDDLE QUINSAM LK AT ARGONAUT ROAD (PE-07008)	125.509	49.93	2015-04-14	6.73	0.715
Vancouver Island	126402	QUINSAM RIV. U/S MIDDLE QUINSAM LK AT ARGONAUT ROAD (PE-07008)	125.509	49.93	2015-05-04	7.45	0.716
Vancouver Island	126402	QUINSAM RIV. U/S MIDDLE QUINSAM LK AT ARGONAUT ROAD (PE-07008)	125.509	49.93	2014-04-07	6.78	0.718
Vancouver Island	126402	QUINSAM RIV. U/S MIDDLE QUINSAM LK AT ARGONAUT ROAD (PE-07008)	125.509	49.93	2015-04-20	6.83	0.718
Vancouver Island	126402	QUINSAM RIV. U/S MIDDLE QUINSAM LK AT ARGONAUT ROAD (PE-07008)	125.509	49.93	2012-06-06 09:10:00	6.73	0.722
Vancouver Island	126402	QUINSAM RIV. U/S MIDDLE QUINSAM LK AT ARGONAUT ROAD (PE-07008)	125.509	49.93	2018-07-17	7.12	0.723
Vancouver Island	126402	QUINSAM RIV. U/S MIDDLE QUINSAM LK AT ARGONAUT ROAD (PE-07008)	125.509	49.93	2013-01-02 13:55:00	6.67	0.727
Vancouver Island	126402	QUINSAM RIV. U/S MIDDLE QUINSAM LK AT ARGONAUT ROAD (PE-07008)	125.509	49.93	2017-11-06	7.1	0.728
Vancouver Island	126402	QUINSAM RIV. U/S MIDDLE QUINSAM LK AT ARGONAUT ROAD (PE-07008)	125.509	49.93	2010-10-25 16:39:00	6.33	0.73
Vancouver Island	126402	QUINSAM RIV. U/S MIDDLE QUINSAM LK AT ARGONAUT ROAD (PE-07008)	125.509	49.93	2016-10-31 12:00:00	6.36	0.731
Vancouver Island	126402	QUINSAM RIV. U/S MIDDLE QUINSAM LK AT ARGONAUT ROAD (PE-07008)	125.509	49.93	2016-04-28 12:00:00	7.07	0.733
Vancouver Island	126402	QUINSAM RIV. U/S MIDDLE QUINSAM LK AT ARGONAUT ROAD (PE-07008)	125.509	49.93	2016-05-03 12:00:00	7.01	0.735
Vancouver Island	126402	QUINSAM RIV. U/S MIDDLE QUINSAM LK AT ARGONAUT ROAD (PE-07008)	125.509	49.93	2017-05-03 12:00:00	6.64	0.736
Vancouver Island	126402	QUINSAM RIV. U/S MIDDLE QUINSAM LK AT ARGONAUT ROAD (PE-07008)	125.509	49.93	2015-10-14	6.81	0.737
Vancouver Island	126402	QUINSAM RIV. U/S MIDDLE QUINSAM LK AT ARGONAUT ROAD (PE-07008)	125.509	49.93	2014-04-02	6.51	0.74
Vancouver Island	126402	QUINSAM RIV. U/S MIDDLE QUINSAM LK AT ARGONAUT ROAD (PE-07008)	125.509	49.93	1981-05-13 11:55:00	6.8	0.74
Vancouver Island	126402	QUINSAM RIV. U/S MIDDLE QUINSAM LK AT ARGONAUT ROAD (PE-07008)	125.509	49.93	1991-08-08 09:00:00	6.92	0.74
Vancouver Island	126402	QUINSAM RIV. U/S MIDDLE QUINSAM LK AT ARGONAUT ROAD (PE-07008)	125.509	49.93	1991-07-24 09:15:00	7	0.74
Vancouver Island	126402	QUINSAM RIV. U/S MIDDLE QUINSAM LK AT ARGONAUT ROAD (PE-07008)	125.509	49.93	2018-08-07	7.04	0.741
Vancouver Island	126402	QUINSAM RIV. U/S MIDDLE QUINSAM LK AT ARGONAUT ROAD (PE-07008)	125.509	49.93	2016-04-19 12:00:00	6.96	0.742
Vancouver Island	126402	QUINSAM RIV. U/S MIDDLE QUINSAM LK AT ARGONAUT ROAD (PE-07008)	125.509	49.93	2016-09-14 12:00:00	7.05	0.749
Vancouver Island	126402	QUINSAM RIV. U/S MIDDLE QUINSAM LK AT ARGONAUT ROAD (PE-07008)	125.509	49.93	2010-10-18 09:20:00	5.64	0.75
Vancouver Island	126402	QUINSAM RIV. U/S MIDDLE QUINSAM LK AT ARGONAUT ROAD (PE-07008)	125.509	49.93	2010-11-08 12:45:00	5.91	0.75
Vancouver Island	126402	QUINSAM RIV. U/S MIDDLE QUINSAM LK AT ARGONAUT ROAD (PE-07008)	125.509	49.93	1991-12-17 11:34:00	6.82	0.75
Vancouver Island	126402	QUINSAM RIV. U/S MIDDLE QUINSAM LK AT ARGONAUT ROAD (PE-07008)	125.509	49.93	2018-08-01	6.9	0.75
Vancouver Island	126402	QUINSAM RIV. U/S MIDDLE QUINSAM LK AT ARGONAUT ROAD (PE-07008)	125.509	49.93	2015-04-27	7.1	0.753
Vancouver Island	126402	QUINSAM RIV. U/S MIDDLE QUINSAM LK AT ARGONAUT ROAD (PE-07008)	125.509	49.93	2014-04-21	6.79	0.755
Vancouver Island	126402	QUINSAM RIV. U/S MIDDLE QUINSAM LK AT ARGONAUT ROAD (PE-07008)	125.509	49.93	2013-10-21 09:00:00	6.23	0.757
Vancouver Island	126402	QUINSAM RIV. U/S MIDDLE QUINSAM LK AT ARGONAUT ROAD (PE-07008)	125.509	49.93	2015-08-12	7.34	0.758
Vancouver Island	126402	QUINSAM RIV. U/S MIDDLE QUINSAM LK AT ARGONAUT ROAD (PE-07008)	125.509	49.93	1989-11-20 12:30:00	6.18	0.76
Vancouver Island	126402	QUINSAM RIV. U/S MIDDLE QUINSAM LK AT ARGONAUT ROAD (PE-07008)	125.509	49.93	2017-10-30	6.27	0.76
Vancouver Island	126402	QUINSAM RIV. U/S MIDDLE QUINSAM LK AT ARGONAUT ROAD (PE-07008)	125.509	49.93	2011-10-05 19:00:00	6.54	0.76
Vancouver Island	126402	QUINSAM RIV. U/S MIDDLE QUINSAM LK AT ARGONAUT ROAD (PE-07008)	125.509	49.93	1980-04-14 13:50:00	6.6	0.76
Vancouver Island	126402	QUINSAM RIV. U/S MIDDLE QUINSAM LK AT ARGONAUT ROAD (PE-07008)	125.509	49.93	1979-11-19 11:15:00	6.8	0.76
Vancouver Island	126402	QUINSAM RIV. U/S MIDDLE QUINSAM LK AT ARGONAUT ROAD (PE-07008)	125.509	49.93	2016-08-22 12:00:00	6.86	0.76
Vancouver Island	126402	QUINSAM RIV. U/S MIDDLE QUINSAM LK AT ARGONAUT ROAD (PE-07008)	125.509	49.93	2010-11-15 08:10:00	6.89	0.76
Vancouver Island	126402	QUINSAM RIV. U/S MIDDLE QUINSAM LK AT ARGONAUT ROAD (PE-07008)	125.509	49.93	1989-12-18 11:00:00	6.91	0.76
Vancouver Island	126402	QUINSAM RIV. U/S MIDDLE QUINSAM LK AT ARGONAUT ROAD (PE-07008)	125.509	49.93	2015-08-17 12:00:00	7.46	0.76
Vancouver Island	126402	QUINSAM RIV. U/S MIDDLE QUINSAM LK AT ARGONAUT ROAD (PE-07008)	125.509	49.93	2017-07-26	7.56	0.76
Vancouver Island	126402	QUINSAM RIV. U/S MIDDLE QUINSAM LK AT ARGONAUT ROAD (PE-07008)	125.509	49.93	2016-08-11 12:00:00	6.76	0.764
Vancouver Island	126402	QUINSAM RIV. U/S MIDDLE QUINSAM LK AT ARGONAUT ROAD (PE-07008)	125.509	49.93	2012-01-03 12:50:00	6.67	0.766
Vancouver Island	126402	QUINSAM RIV. U/S MIDDLE QUINSAM LK AT ARGONAUT ROAD (PE-07008)	125.509	49.93	2013-07-22	6.72	0.766
Vancouver Island	126402	QUINSAM RIV. U/S MIDDLE QUINSAM LK AT ARGONAUT ROAD (PE-07008)	125.509	49.93	2017-08-30	6.64	0.767
Vancouver Island	126402	QUINSAM RIV. U/S MIDDLE QUINSAM LK AT ARGONAUT ROAD (PE-07008)	125.509	49.93	2018-08-14	7.27	0.768
Vancouver Island	126402	QUINSAM RIV. U/S MIDDLE QUINSAM LK AT ARGONAUT ROAD (PE-07008)	125.509	49.93	2014-04-14	6.79	0.769
Vancouver Island	126402	QUINSAM RIV. U/S MIDDLE QUINSAM LK AT ARGONAUT ROAD (PE-07008)	125.509	49.93	2010-09-07 07:55:00	6.49	0.77
Vancouver Island	126402	QUINSAM RIV. U/S MIDDLE QUINSAM LK AT ARGONAUT ROAD (PE-07008)	125.509	49.93	1991-08-12 13:00:00	6.98	0.77
Vancouver Island	126402	QUINSAM RIV. U/S MIDDLE QUINSAM LK AT ARGONAUT ROAD (PE-07008)	125.509	49.93	1989-11-27 09:55:00	7.08	0.77
Vancouver Island	126402	QUINSAM RIV. U/S MIDDLE QUINSAM LK AT ARGONAUT ROAD (PE-07008)	125.509	49.93	1989-12-04 10:20:00	7.42	0.77
Vancouver Island	126402	QUINSAM RIV. U/S MIDDLE QUINSAM LK AT ARGONAUT ROAD (PE-07008)	125.509	49.93	2017-08-04	7.88	0.771
Vancouver Island	126402	QUINSAM RIV. U/S MIDDLE QUINSAM LK AT ARGONAUT ROAD (PE-07008)	125.509	49.93	2016-08-16 12:00:00	6.94	0.774
Vancouver Island	126402	QUINSAM RIV. U/S MIDDLE QUINSAM LK AT ARGONAUT ROAD (PE-07008)	125.509	49.93	2018-05-08	7.35	0.775
Vancouver Island	126402	QUINSAM RIV. U/S MIDDLE QUINSAM LK AT ARGONAUT ROAD (PE-07008)	125.509	49.93	2015-10-28	6.2	0.779
Vancouver Island	126402	QUINSAM RIV. U/S MIDDLE QUINSAM LK AT ARGONAUT ROAD (PE-07008)	125.509	49.93	2010-08-16	6.2	0.78
Vancouver Island	126402	QUINSAM RIV. U/S MIDDLE QUINSAM LK AT ARGONAUT ROAD (PE-07008)	125.509	49.93	2010-08-09 09:30:00	6.83	0.78
Vancouver Island	126402	QUINSAM RIV. U/S MIDDLE QUINSAM LK AT ARGONAUT ROAD (PE-07008)	125.509	49.93	2016-05-10 12:00:00	6.94	0.781
Vancouver Island	126402	QUINSAM RIV. U/S MIDDLE QUINSAM LK AT ARGONAUT ROAD (PE-07008)	125.509	49.93	2016-08-29 12:00:00	7.18	0.784
Vancouver Island	126402	QUINSAM RIV. U/S MIDDLE QUINSAM LK AT ARGONAUT ROAD (PE-07008)	125.509	49.93	1991-07-16 18:40:00	6.97	0.79
Vancouver Island	126402	QUINSAM RIV. U/S MIDDLE QUINSAM LK AT ARGONAUT ROAD (PE-07008)	125.509	49.93	1991-11-27 14:00:00	7.22	0.79
Vancouver Island	126402	QUINSAM RIV. U/S MIDDLE QUINSAM LK AT ARGONAUT ROAD (PE-07008)	125.509	49.93	2014-04-28	6.98	0.792
Vancouver Island	126402	QUINSAM RIV. U/S MIDDLE QUINSAM LK AT ARGONAUT ROAD (PE-07008)	125.509	49.93	2013-10-28 09:00:00	7.27	0.792
Vancouver Island	126402	QUINSAM RIV. U/S MIDDLE QUINSAM LK AT ARGONAUT ROAD (PE-07008)	125.509	49.93	2015-11-04	6.15	0.793
Vancouver Island	126402	QUINSAM RIV. U/S MIDDLE QUINSAM LK AT ARGONAUT ROAD (PE-07008)	125.509	49.93	2015-11-10	6.57	0.795
Vancouver Island	126402	QUINSAM RIV. U/S MIDDLE QUINSAM LK AT ARGONAUT ROAD (PE-07008)	125.509	49.93	2013-10-07	6.79	0.796
Vancouver Island	126402	QUINSAM RIV. U/S MIDDLE QUINSAM LK AT ARGONAUT ROAD (PE-07008)	125.509	49.93	2013-10-15 09:00:00	6.66	0.798
Vancouver Island	126402	QUINSAM RIV. U/S MIDDLE QUINSAM LK AT ARGONAUT ROAD (PE-07008)	125.509	49.93	2000-06-29 11:30:00	6.3	0.8
Vancouver Island	126402	QUINSAM RIV. U/S MIDDLE QUINSAM LK AT ARGONAUT ROAD (PE-07008)	125.509	49.93	1997-03-24 13:45:00	6.5	0.8
Vancouver Island	126402	QUINSAM RIV. U/S MIDDLE QUINSAM LK AT ARGONAUT ROAD (PE-07008)	125.509	49.93	2017-10-16	6.86	0.801
Vancouver Island	126402	QUINSAM RIV. U/S MIDDLE QUINSAM LK AT ARGONAUT ROAD (PE-07008)	125.509	49.93	2014-11-12	7.08	0.809
Vancouver Island	126402	QUINSAM RIV. U/S MIDDLE QUINSAM LK AT ARGONAUT ROAD (PE-07008)	125.509	49.93	2014-08-13	7.55	0.81
Vancouver Island	126402	QUINSAM RIV. U/S MIDDLE QUINSAM LK AT ARGONAUT ROAD (PE-07008)	125.509	49.93	2015-08-24	7.18	0.814
Vancouver Island	126402	QUINSAM RIV. U/S MIDDLE QUINSAM LK AT ARGONAUT ROAD (PE-07008)	125.509	49.93	2013-07-29 00:02:00	6.9	0.817
Vancouver Island	126402	QUINSAM RIV. U/S MIDDLE QUINSAM LK AT ARGONAUT ROAD (PE-07008)	125.509	49.93	2015-08-04	7.85	0.817
Vancouver Island	126402	QUINSAM RIV. U/S MIDDLE QUINSAM LK AT ARGONAUT ROAD (PE-07008)	125.509	49.93	2010-08-23 11:40:00	6.94	0.82
Vancouver Island	126402	QUINSAM RIV. U/S MIDDLE QUINSAM LK AT ARGONAUT ROAD (PE-07008)	125.509	49.93	1979-07-31 11:05:00	7.6	0.82
Vancouver Island	126402	QUINSAM RIV. U/S MIDDLE QUINSAM LK AT ARGONAUT ROAD (PE-07008)	125.509	49.93	2014-11-03	7.22	0.824
Vancouver Island	126402	QUINSAM RIV. U/S MIDDLE QUINSAM LK AT ARGONAUT ROAD (PE-07008)	125.509	49.93	2014-10-27	6.46	0.828
Vancouver Island	126402	QUINSAM RIV. U/S MIDDLE QUINSAM LK AT ARGONAUT ROAD (PE-07008)	125.509	49.93	1990-11-19 09:40:00	7.51	0.84
Vancouver Island	126402	QUINSAM RIV. U/S MIDDLE QUINSAM LK AT ARGONAUT ROAD (PE-07008)	125.509	49.93	2014-07-31	7.55	0.841
Vancouver Island	126402	QUINSAM RIV. U/S MIDDLE QUINSAM LK AT ARGONAUT ROAD (PE-07008)	125.509	49.93	2014-08-05 11:00:00	7.47	0.854
Vancouver Island	126402	QUINSAM RIV. U/S MIDDLE QUINSAM LK AT ARGONAUT ROAD (PE-07008)	125.509	49.93	2014-07-23	7.8	0.861
Vancouver Island	126402	QUINSAM RIV. U/S MIDDLE QUINSAM LK AT ARGONAUT ROAD (PE-07008)	125.509	49.93	2016-08-04 12:00:00	7.31	0.877
Vancouver Island	126402	QUINSAM RIV. U/S MIDDLE QUINSAM LK AT ARGONAUT ROAD (PE-07008)	125.509	49.93	2014-10-15	7.24	0.879
Vancouver Island	126402	QUINSAM RIV. U/S MIDDLE QUINSAM LK AT ARGONAUT ROAD (PE-07008)	125.509	49.93	2017-10-11	7.31	0.89
Vancouver Island	126402	QUINSAM RIV. U/S MIDDLE QUINSAM LK AT ARGONAUT ROAD (PE-07008)	125.509	49.93	2014-08-20	7.71	0.912
Vancouver Island	126402	QUINSAM RIV. U/S MIDDLE QUINSAM LK AT ARGONAUT ROAD (PE-07008)	125.509	49.93	2016-09-15 12:00:00	12.2	1.38
Vancouver Island	126402	QUINSAM RIV. U/S MIDDLE QUINSAM LK AT ARGONAUT ROAD (PE-07008)	125.509	49.93	2015-09-01	96.1	12.1
Vancouver Island	1100161	SPECTACLE LAKE; SOUTH END	123.57	48.578	1991-01-16	1.58	0.25
Vancouver Island	1100161	SPECTACLE LAKE; SOUTH END	123.57	48.578	1990-02-14	2.6	0.46
Vancouver Island	1100161	SPECTACLE LAKE; SOUTH END	123.57	48.578	1990-12-06	3.96	0.56
Vancouver Island	1100161	SPECTACLE LAKE; SOUTH END	123.57	48.578	1987-02-04	3.57	0.58
Vancouver Island	1100161	SPECTACLE LAKE; SOUTH END	123.57	48.578	1991-02-13	4.02	0.64
Vancouver Island	1100161	SPECTACLE LAKE; SOUTH END	123.57	48.578	1991-12-11	4.02	0.64
Vancouver Island	1100161	SPECTACLE LAKE; SOUTH END	123.57	48.578	1989-04-11	4.09	0.67
Vancouver Island	1100161	SPECTACLE LAKE; SOUTH END	123.57	48.578	1991-03-20	4.11	0.67
Vancouver Island	1100161	SPECTACLE LAKE; SOUTH END	123.57	48.578	1990-01-10	4.38	0.69
Vancouver Island	1100161	SPECTACLE LAKE; SOUTH END	123.57	48.578	1990-03-13	4	0.7
Vancouver Island	1100161	SPECTACLE LAKE; SOUTH END	123.57	48.578	1989-01-05	4.18	0.71
Vancouver Island	1100161	SPECTACLE LAKE; SOUTH END	123.57	48.578	1988-03-01	4.82	0.73
Vancouver Island	1100161	SPECTACLE LAKE; SOUTH END	123.57	48.578	1990-04-11	4.81	0.75
Vancouver Island	1100161	SPECTACLE LAKE; SOUTH END	123.57	48.578	1991-05-14	4.67	0.76
Vancouver Island	1100161	SPECTACLE LAKE; SOUTH END	123.57	48.578	1987-04-08	5.2	0.77
Vancouver Island	1100161	SPECTACLE LAKE; SOUTH END	123.57	48.578	1989-03-08	3.9	0.78
Vancouver Island	1100161	SPECTACLE LAKE; SOUTH END	123.57	48.578	1988-12-14	4.61	0.78
Vancouver Island	1100161	SPECTACLE LAKE; SOUTH END	123.57	48.578	1988-04-12	5.39	0.79
Vancouver Island	1100161	SPECTACLE LAKE; SOUTH END	123.57	48.578	1991-08-13 12:20:00	4.98	0.8
Vancouver Island	1100161	SPECTACLE LAKE; SOUTH END	123.57	48.578	1989-12-06	4.96	0.81
Vancouver Island	1100161	SPECTACLE LAKE; SOUTH END	123.57	48.578	1991-07-09	5.05	0.81
Vancouver Island	1100161	SPECTACLE LAKE; SOUTH END	123.57	48.578	1991-11-14	5.1	0.81
Vancouver Island	1100161	SPECTACLE LAKE; SOUTH END	123.57	48.578	1989-05-03	5.05	0.83
Vancouver Island	1100161	SPECTACLE LAKE; SOUTH END	123.57	48.578	1989-11-07	5.02	0.84
Vancouver Island	1100161	SPECTACLE LAKE; SOUTH END	123.57	48.578	1991-08-13 12:25:00	5.1	0.84
Vancouver Island	1100161	SPECTACLE LAKE; SOUTH END	123.57	48.578	1989-06-06	5.13	0.84
Vancouver Island	1100161	SPECTACLE LAKE; SOUTH END	123.57	48.578	1990-05-10	5.14	0.84
Vancouver Island	1100161	SPECTACLE LAKE; SOUTH END	123.57	48.578	1991-06-13	5.05	0.85
Vancouver Island	1100161	SPECTACLE LAKE; SOUTH END	123.57	48.578	1988-05-10	5.22	0.86
Vancouver Island	1100161	SPECTACLE LAKE; SOUTH END	123.57	48.578	1991-08-13 12:15:00	5.4	0.87
Vancouver Island	1100161	SPECTACLE LAKE; SOUTH END	123.57	48.578	1991-10-08	5.52	0.87
Vancouver Island	1100161	SPECTACLE LAKE; SOUTH END	123.57	48.578	1991-08-13 12:05:00	5.48	0.88
Vancouver Island	1100161	SPECTACLE LAKE; SOUTH END	123.57	48.578	1988-11-24	5.43	0.89
Vancouver Island	1100161	SPECTACLE LAKE; SOUTH END	123.57	48.578	1991-08-13 12:00:00	5.45	0.9
Vancouver Island	1100161	SPECTACLE LAKE; SOUTH END	123.57	48.578	1991-08-13 12:10:00	5.57	0.9
Vancouver Island	1100161	SPECTACLE LAKE; SOUTH END	123.57	48.578	1990-06-07	5.7	0.9
Vancouver Island	1100161	SPECTACLE LAKE; SOUTH END	123.57	48.578	1989-10-03	5.16	0.91
Vancouver Island	1100161	SPECTACLE LAKE; SOUTH END	123.57	48.578	1989-08-02	5.4	0.91
Vancouver Island	1100161	SPECTACLE LAKE; SOUTH END	123.57	48.578	1989-07-06	5.33	0.92
Vancouver Island	1100161	SPECTACLE LAKE; SOUTH END	123.57	48.578	1988-06-09	5.48	0.92
Vancouver Island	1100161	SPECTACLE LAKE; SOUTH END	123.57	48.578	1991-09-18	5.52	0.92
Vancouver Island	1100161	SPECTACLE LAKE; SOUTH END	123.57	48.578	1989-09-07	5.23	0.93
Vancouver Island	1100161	SPECTACLE LAKE; SOUTH END	123.57	48.578	1989-02-09	5.43	0.93
Vancouver Island	1100161	SPECTACLE LAKE; SOUTH END	123.57	48.578	1988-10-19	5.73	0.93
Vancouver Island	1100161	SPECTACLE LAKE; SOUTH END	123.57	48.578	1988-09-15	5.77	0.96
Vancouver Island	1100161	SPECTACLE LAKE; SOUTH END	123.57	48.578	1988-07-05	5.81	0.96
Vancouver Island	1100161	SPECTACLE LAKE; SOUTH END	123.57	48.578	1988-08-03	6.18	0.99
Vancouver Island	1100161	SPECTACLE LAKE; SOUTH END	123.57	48.578	1990-10-10	6.02	1.02
Vancouver Island	1100161	SPECTACLE LAKE; SOUTH END	123.57	48.578	1990-11-07	6.2	1.02
Vancouver Island	1100161	SPECTACLE LAKE; SOUTH END	123.57	48.578	1990-07-11	6.83	1.02
Vancouver Island	1100161	SPECTACLE LAKE; SOUTH END	123.57	48.578	1990-09-20	6.08	1.03
Vancouver Island	1100161	SPECTACLE LAKE; SOUTH END	123.57	48.578	1990-08-01	6.47	1.03
Vancouver Island	1132502	GOOSENECK LAKE; AT DEEPEST POINT	125.519	49.9531	2016-09-07 00:03:00	5.55	0.677
Vancouver Island	1132502	GOOSENECK LAKE; AT DEEPEST POINT	125.519	49.9531	2016-09-07 00:02:00	5.09	0.684
Vancouver Island	1132502	GOOSENECK LAKE; AT DEEPEST POINT	125.519	49.9531	1996-08-19 18:30:00	6.2	0.7
Vancouver Island	1132502	GOOSENECK LAKE; AT DEEPEST POINT	125.519	49.9531	2016-09-07 00:01:00	6.5	0.775
Vancouver Island	1132502	GOOSENECK LAKE; AT DEEPEST POINT	125.519	49.9531	2016-09-07	6.32	0.784
Vancouver Island	1134011	DIVER LAKE; MIDLAKE	124.013	49.2039	1996-08-14 10:00:00	18.4	5.2
Vancouver Island	E206283	LIZARD LAKE DEEPEST POINT	124.222	48.6067	1999-02-17 12:45:00	2.7	0.395
Vancouver Island	E206283	LIZARD LAKE DEEPEST POINT	124.222	48.6067	1999-02-17 12:55:00	2.7	0.4
Vancouver Island	E206283	LIZARD LAKE DEEPEST POINT	124.222	48.6067	1991-02-06 11:59:00	3.19	0.41
Vancouver Island	E206283	LIZARD LAKE DEEPEST POINT	124.222	48.6067	1991-01-15 12:50:00	3.2	0.42
Vancouver Island	E206283	LIZARD LAKE DEEPEST POINT	124.222	48.6067	1991-08-07 10:00:00	3.26	0.42
Vancouver Island	E206283	LIZARD LAKE DEEPEST POINT	124.222	48.6067	1995-11-16 10:45:00	3.34	0.44
Vancouver Island	E206283	LIZARD LAKE DEEPEST POINT	124.222	48.6067	1991-03-05	3.48	0.44
Vancouver Island	E206283	LIZARD LAKE DEEPEST POINT	124.222	48.6067	1989-12-06 10:00:00	3.75	0.44
Vancouver Island	E206283	LIZARD LAKE DEEPEST POINT	124.222	48.6067	1990-12-04 12:00:00	3.22	0.45
Vancouver Island	E206283	LIZARD LAKE DEEPEST POINT	124.222	48.6067	1994-07-27 12:30:00	3.23	0.45
Vancouver Island	E206283	LIZARD LAKE DEEPEST POINT	124.222	48.6067	1994-03-07	3.35	0.45
Vancouver Island	E206283	LIZARD LAKE DEEPEST POINT	124.222	48.6067	1991-07-03 12:30:00	3.45	0.45
Vancouver Island	E206283	LIZARD LAKE DEEPEST POINT	124.222	48.6067	1991-10-01 11:30:00	3.74	0.45
Vancouver Island	E206283	LIZARD LAKE DEEPEST POINT	124.222	48.6067	1991-06-06 11:20:00	3.28	0.46
Vancouver Island	E206283	LIZARD LAKE DEEPEST POINT	124.222	48.6067	1991-04-11 11:30:00	3.31	0.46
Vancouver Island	E206283	LIZARD LAKE DEEPEST POINT	124.222	48.6067	1994-06-01 12:35:00	3.35	0.46
Vancouver Island	E206283	LIZARD LAKE DEEPEST POINT	124.222	48.6067	1995-03-08 10:30:00	3.41	0.46
Vancouver Island	E206283	LIZARD LAKE DEEPEST POINT	124.222	48.6067	1990-03-07 11:45:00	4.14	0.46
Vancouver Island	E206283	LIZARD LAKE DEEPEST POINT	124.222	48.6067	1995-02-07 12:30:00	3.52	0.47
Vancouver Island	E206283	LIZARD LAKE DEEPEST POINT	124.222	48.6067	1993-04-01 12:35:00	3.61	0.47
Vancouver Island	E206283	LIZARD LAKE DEEPEST POINT	124.222	48.6067	1993-02-03 12:30:00	3.39	0.48
Vancouver Island	E206283	LIZARD LAKE DEEPEST POINT	124.222	48.6067	1991-11-12 12:15:00	3.41	0.48
Vancouver Island	E206283	LIZARD LAKE DEEPEST POINT	124.222	48.6067	1989-04-04 10:50:00	3.51	0.48
Vancouver Island	E206283	LIZARD LAKE DEEPEST POINT	124.222	48.6067	1993-05-04 12:45:00	3.52	0.48
Vancouver Island	E206283	LIZARD LAKE DEEPEST POINT	124.222	48.6067	1990-06-05 13:00:00	3.66	0.48
Vancouver Island	E206283	LIZARD LAKE DEEPEST POINT	124.222	48.6067	1994-02-02 12:30:00	3.98	0.48
Vancouver Island	E206283	LIZARD LAKE DEEPEST POINT	124.222	48.6067	1994-06-28 12:35:00	3.47	0.49
Vancouver Island	E206283	LIZARD LAKE DEEPEST POINT	124.222	48.6067	1990-05-14 11:41:00	3.5	0.49
Vancouver Island	E206283	LIZARD LAKE DEEPEST POINT	124.222	48.6067	1991-09-05 11:00:00	3.5	0.49
Vancouver Island	E206283	LIZARD LAKE DEEPEST POINT	124.222	48.6067	1989-09-06 13:15:00	3.54	0.49
Vancouver Island	E206283	LIZARD LAKE DEEPEST POINT	124.222	48.6067	1992-01-08 12:45:00	3.65	0.49
Vancouver Island	E206283	LIZARD LAKE DEEPEST POINT	124.222	48.6067	1994-10-05 11:55:00	3.65	0.5
Vancouver Island	E206283	LIZARD LAKE DEEPEST POINT	124.222	48.6067	1989-06-06 12:50:00	3.7	0.5
Vancouver Island	E206283	LIZARD LAKE DEEPEST POINT	124.222	48.6067	1993-07-05 12:55:00	3.71	0.5
Vancouver Island	E206283	LIZARD LAKE DEEPEST POINT	124.222	48.6067	1989-10-03 13:15:00	3.56	0.51
Vancouver Island	E206283	LIZARD LAKE DEEPEST POINT	124.222	48.6067	1990-02-13 13:00:00	3.56	0.51
Vancouver Island	E206283	LIZARD LAKE DEEPEST POINT	124.222	48.6067	1994-09-08 12:40:00	3.62	0.51
Vancouver Island	E206283	LIZARD LAKE DEEPEST POINT	124.222	48.6067	1993-06-01 14:40:00	3.77	0.51
Vancouver Island	E206283	LIZARD LAKE DEEPEST POINT	124.222	48.6067	1995-01-04 10:35:00	3.84	0.51
Vancouver Island	E206283	LIZARD LAKE DEEPEST POINT	124.222	48.6067	1990-06-26 13:25:00	3.64	0.52
Vancouver Island	E206283	LIZARD LAKE DEEPEST POINT	124.222	48.6067	1994-10-31 12:13:00	3.69	0.52
Vancouver Island	E206283	LIZARD LAKE DEEPEST POINT	124.222	48.6067	1993-09-07 13:00:00	3.86	0.52
Vancouver Island	E206283	LIZARD LAKE DEEPEST POINT	124.222	48.6067	1990-01-10 10:50:00	3.68	0.53
Vancouver Island	E206283	LIZARD LAKE DEEPEST POINT	124.222	48.6067	1989-05-04	3.78	0.53
Vancouver Island	E206283	LIZARD LAKE DEEPEST POINT	124.222	48.6067	1989-05-04 12:45:00	3.78	0.53
Vancouver Island	E206283	LIZARD LAKE DEEPEST POINT	124.222	48.6067	1989-10-31 13:15:00	3.92	0.53
Vancouver Island	E206283	LIZARD LAKE DEEPEST POINT	124.222	48.6067	1990-10-02 11:45:00	3.72	0.54
Vancouver Island	E206283	LIZARD LAKE DEEPEST POINT	124.222	48.6067	1993-11-03 10:15:00	3.97	0.54
Vancouver Island	E206283	LIZARD LAKE DEEPEST POINT	124.222	48.6067	1994-12-15 11:15:00	3.97	0.54
Vancouver Island	E206283	LIZARD LAKE DEEPEST POINT	124.222	48.6067	2018-02-21 12:35:00	3.97	0.54
Vancouver Island	E206283	LIZARD LAKE DEEPEST POINT	124.222	48.6067	1993-12-01 10:45:00	3.99	0.54
Vancouver Island	E206283	LIZARD LAKE DEEPEST POINT	124.222	48.6067	1989-08-09	4.17	0.54
Vancouver Island	E206283	LIZARD LAKE DEEPEST POINT	124.222	48.6067	1989-07-04 13:00:00	4.23	0.54
Vancouver Island	E206283	LIZARD LAKE DEEPEST POINT	124.222	48.6067	1994-01-12 11:30:00	4.44	0.54
Vancouver Island	E206283	LIZARD LAKE DEEPEST POINT	124.222	48.6067	2018-02-21 12:35:00	3.85	0.542
Vancouver Island	E206283	LIZARD LAKE DEEPEST POINT	124.222	48.6067	1990-08-01 13:25:00	4.07	0.55
Vancouver Island	E206283	LIZARD LAKE DEEPEST POINT	124.222	48.6067	1990-09-05 14:05:00	3.93	0.56
Vancouver Island	E206283	LIZARD LAKE DEEPEST POINT	124.222	48.6067	1990-11-15	4.15	0.57
Vancouver Island	E206283	LIZARD LAKE DEEPEST POINT	124.222	48.6067	1993-08-03 11:35:00	4	0.59
Vancouver Island	E206283	LIZARD LAKE DEEPEST POINT	124.222	48.6067	1991-12-03 12:30:00	4.32	0.59
Vancouver Island	E206283	LIZARD LAKE DEEPEST POINT	124.222	48.6067	1990-04-03 11:15:00	4.74	0.59
Vancouver Island	E206283	LIZARD LAKE DEEPEST POINT	124.222	48.6067	1993-03-01 11:15:00	3.94	0.6
Vancouver Island	E206289	WESTWOOD LAKE - CENTRE	124.001	49.1622	1996-08-13 16:30:00	3.5	1.3
Vancouver Island	E206290	STOCKING LAKE - CENTRE	123.826	48.96	2008-02-27 08:15:00	1.05	0.21
Vancouver Island	E206290	STOCKING LAKE - CENTRE	123.826	48.96	1991-02-13	0.9	0.23
Vancouver Island	E206290	STOCKING LAKE - CENTRE	123.826	48.96	1991-01-16	1.9	0.33
Vancouver Island	E206290	STOCKING LAKE - CENTRE	123.826	48.96	2008-04-22 08:30:00	2.82	0.42
Vancouver Island	E206290	STOCKING LAKE - CENTRE	123.826	48.96	2008-05-28 08:45:00	3.05	0.42
Vancouver Island	E206290	STOCKING LAKE - CENTRE	123.826	48.96	1989-03-08	1.76	0.43
Vancouver Island	E206290	STOCKING LAKE - CENTRE	123.826	48.96	2008-03-26 08:55:00	3.2	0.45
Vancouver Island	E206290	STOCKING LAKE - CENTRE	123.826	48.96	1991-04-16	3.1	0.46
Vancouver Island	E206290	STOCKING LAKE - CENTRE	123.826	48.96	1987-02-04	3.04	0.47
Vancouver Island	E206290	STOCKING LAKE - CENTRE	123.826	48.96	1991-05-14	3.16	0.47
Vancouver Island	E206290	STOCKING LAKE - CENTRE	123.826	48.96	1990-12-06	3.29	0.47
Vancouver Island	E206290	STOCKING LAKE - CENTRE	123.826	48.96	1991-11-14	3.31	0.47
Vancouver Island	E206290	STOCKING LAKE - CENTRE	123.826	48.96	1991-09-18	3.35	0.47
Vancouver Island	E206290	STOCKING LAKE - CENTRE	123.826	48.96	1991-03-20	3.16	0.48
Vancouver Island	E206290	STOCKING LAKE - CENTRE	123.826	48.96	1993-04-14	3.23	0.48
Vancouver Island	E206290	STOCKING LAKE - CENTRE	123.826	48.96	1991-07-09	3.32	0.48
Vancouver Island	E206290	STOCKING LAKE - CENTRE	123.826	48.96	1987-04-08	3.6	0.48
Vancouver Island	E206290	STOCKING LAKE - CENTRE	123.826	48.96	1988-12-14	3.07	0.49
Vancouver Island	E206290	STOCKING LAKE - CENTRE	123.826	48.96	2008-05-28 08:45:00	3.29	0.49
Vancouver Island	E206290	STOCKING LAKE - CENTRE	123.826	48.96	1991-12-11	3.41	0.49
Vancouver Island	E206290	STOCKING LAKE - CENTRE	123.826	48.96	1991-10-08	3.42	0.49
Vancouver Island	E206290	STOCKING LAKE - CENTRE	123.826	48.96	2008-06-25 09:00:00	3.34	0.5
Vancouver Island	E206290	STOCKING LAKE - CENTRE	123.826	48.96	1991-08-13	3.38	0.5
Vancouver Island	E206290	STOCKING LAKE - CENTRE	123.826	48.96	1989-12-06	3.75	0.5
Vancouver Island	E206290	STOCKING LAKE - CENTRE	123.826	48.96	1989-04-11	3.4	0.51
Vancouver Island	E206290	STOCKING LAKE - CENTRE	123.826	48.96	1989-11-07	3.51	0.51
Vancouver Island	E206290	STOCKING LAKE - CENTRE	123.826	48.96	1989-06-06	3.59	0.52
Vancouver Island	E206290	STOCKING LAKE - CENTRE	123.826	48.96	1989-01-05	3.53	0.53
Vancouver Island	E206290	STOCKING LAKE - CENTRE	123.826	48.96	1989-05-03	3.57	0.53
Vancouver Island	E206290	STOCKING LAKE - CENTRE	123.826	48.96	1990-04-11	3.71	0.53
Vancouver Island	E206290	STOCKING LAKE - CENTRE	123.826	48.96	1991-06-13	3.22	0.54
Vancouver Island	E206290	STOCKING LAKE - CENTRE	123.826	48.96	1989-10-03	3.43	0.54
Vancouver Island	E206290	STOCKING LAKE - CENTRE	123.826	48.96	1989-09-07	3.6	0.54
Vancouver Island	E206290	STOCKING LAKE - CENTRE	123.826	48.96	1990-01-10	3.67	0.54
Vancouver Island	E206290	STOCKING LAKE - CENTRE	123.826	48.96	1988-03-01	3.71	0.54
Vancouver Island	E206290	STOCKING LAKE - CENTRE	123.826	48.96	1989-07-06	3.6	0.55
Vancouver Island	E206290	STOCKING LAKE - CENTRE	123.826	48.96	1989-08-02	3.96	0.55
Vancouver Island	E206290	STOCKING LAKE - CENTRE	123.826	48.96	1988-06-09	3.69	0.56
Vancouver Island	E206290	STOCKING LAKE - CENTRE	123.826	48.96	1990-05-10	4.79	0.56
Vancouver Island	E206290	STOCKING LAKE - CENTRE	123.826	48.96	1990-06-07	3.84	0.57
Vancouver Island	E206290	STOCKING LAKE - CENTRE	123.826	48.96	1988-04-12	4.35	0.57
Vancouver Island	E206290	STOCKING LAKE - CENTRE	123.826	48.96	1988-07-05	3.83	0.58
Vancouver Island	E206290	STOCKING LAKE - CENTRE	123.826	48.96	1988-10-19	3.89	0.58
Vancouver Island	E206290	STOCKING LAKE - CENTRE	123.826	48.96	1988-08-03	4	0.58
Vancouver Island	E206290	STOCKING LAKE - CENTRE	123.826	48.96	1988-09-15	3.93	0.59
Vancouver Island	E206290	STOCKING LAKE - CENTRE	123.826	48.96	1990-08-01	4.03	0.59
Vancouver Island	E206290	STOCKING LAKE - CENTRE	123.826	48.96	1990-03-13	4.27	0.59
Vancouver Island	E206290	STOCKING LAKE - CENTRE	123.826	48.96	1988-11-24	4.11	0.6
Vancouver Island	E206290	STOCKING LAKE - CENTRE	123.826	48.96	1990-07-11	4.38	0.6
Vancouver Island	E206290	STOCKING LAKE - CENTRE	123.826	48.96	1990-09-20	4	0.61
Vancouver Island	E206290	STOCKING LAKE - CENTRE	123.826	48.96	1990-10-10	4.08	0.61
Vancouver Island	E206290	STOCKING LAKE - CENTRE	123.826	48.96	1990-11-07	4.11	0.61
Vancouver Island	E206290	STOCKING LAKE - CENTRE	123.826	48.96	1989-02-09	3.96	0.62
Vancouver Island	E206519	MIDDLE QUINSAM LAKE	125.48	49.9214	1988-06-28 13:15:00	5.79	1.62
Vancouver Island	E206618	MIDDLE QUINSAM LAKE (PE-07008)	125.487	49.9239	2012-05-30	7.86	0.864
Vancouver Island	E206618	MIDDLE QUINSAM LAKE (PE-07008)	125.487	49.9239	2016-11-09 10:00:00	7.71	0.881
Vancouver Island	E206618	MIDDLE QUINSAM LAKE (PE-07008)	125.487	49.9239	2014-11-13 13:16:00	8	0.899
Vancouver Island	E206618	MIDDLE QUINSAM LAKE (PE-07008)	125.487	49.9239	2012-05-30 00:01:00	8.07	0.905
Vancouver Island	E206618	MIDDLE QUINSAM LAKE (PE-07008)	125.487	49.9239	2014-11-13 13:15:00	8.71	0.912
Vancouver Island	E206618	MIDDLE QUINSAM LAKE (PE-07008)	125.487	49.9239	2016-11-09 10:00:00	8.51	0.933
Vancouver Island	E206618	MIDDLE QUINSAM LAKE (PE-07008)	125.487	49.9239	2014-11-13 13:17:00	8.65	0.96
Vancouver Island	E206618	MIDDLE QUINSAM LAKE (PE-07008)	125.487	49.9239	2014-11-13 13:18:00	8.69	0.965
Vancouver Island	E206618	MIDDLE QUINSAM LAKE (PE-07008)	125.487	49.9239	2012-07-25 09:31:00	8.83	0.98
Vancouver Island	E206618	MIDDLE QUINSAM LAKE (PE-07008)	125.487	49.9239	2012-07-25 09:30:00	9.01	1.01
Vancouver Island	E206618	MIDDLE QUINSAM LAKE (PE-07008)	125.487	49.9239	2011-08-12	9.13	1.07
Vancouver Island	E206618	MIDDLE QUINSAM LAKE (PE-07008)	125.487	49.9239	2014-11-05 13:17:00	8.32	1.08
Vancouver Island	E206618	MIDDLE QUINSAM LAKE (PE-07008)	125.487	49.9239	2013-05-23 15:00:00	9.36	1.09
Vancouver Island	E206618	MIDDLE QUINSAM LAKE (PE-07008)	125.487	49.9239	2011-08-12 00:15:00	9.78	1.09
Vancouver Island	E206618	MIDDLE QUINSAM LAKE (PE-07008)	125.487	49.9239	2014-11-05 13:16:00	8.3	1.1
Vancouver Island	E206618	MIDDLE QUINSAM LAKE (PE-07008)	125.487	49.9239	2013-05-23 15:01:00	9.43	1.1
Vancouver Island	E206618	MIDDLE QUINSAM LAKE (PE-07008)	125.487	49.9239	2016-11-09 10:00:00	9.77	1.1
Vancouver Island	E206618	MIDDLE QUINSAM LAKE (PE-07008)	125.487	49.9239	2013-04-26 15:02:00	8.62	1.11
Vancouver Island	E206618	MIDDLE QUINSAM LAKE (PE-07008)	125.487	49.9239	2014-11-18 13:15:00	8.68	1.11
Vancouver Island	E206618	MIDDLE QUINSAM LAKE (PE-07008)	125.487	49.9239	2014-11-18 13:17:00	8.9	1.11
Vancouver Island	E206618	MIDDLE QUINSAM LAKE (PE-07008)	125.487	49.9239	2013-04-26 15:01:00	9.07	1.11
Vancouver Island	E206618	MIDDLE QUINSAM LAKE (PE-07008)	125.487	49.9239	2014-11-05 13:15:00	8.25	1.12
Vancouver Island	E206618	MIDDLE QUINSAM LAKE (PE-07008)	125.487	49.9239	2014-11-18 13:16:00	8.72	1.12
Vancouver Island	E206618	MIDDLE QUINSAM LAKE (PE-07008)	125.487	49.9239	2016-04-20 13:17:00	11.1	1.12
Vancouver Island	E206618	MIDDLE QUINSAM LAKE (PE-07008)	125.487	49.9239	2014-11-05 13:18:00	8.47	1.14
Vancouver Island	E206618	MIDDLE QUINSAM LAKE (PE-07008)	125.487	49.9239	2014-11-18 13:18:00	9.01	1.14
Vancouver Island	E206618	MIDDLE QUINSAM LAKE (PE-07008)	125.487	49.9239	2012-08-22 09:30:00	9.6	1.14
Vancouver Island	E206618	MIDDLE QUINSAM LAKE (PE-07008)	125.487	49.9239	2012-08-22 09:31:00	9.66	1.14
Vancouver Island	E206618	MIDDLE QUINSAM LAKE (PE-07008)	125.487	49.9239	2016-05-04 13:15:00	10	1.15
Vancouver Island	E206618	MIDDLE QUINSAM LAKE (PE-07008)	125.487	49.9239	2016-05-04 13:15:00	11	1.16
Vancouver Island	E206618	MIDDLE QUINSAM LAKE (PE-07008)	125.487	49.9239	2016-05-04 13:15:00	10.3	1.17
Vancouver Island	E206618	MIDDLE QUINSAM LAKE (PE-07008)	125.487	49.9239	2016-04-20 13:16:00	11.8	1.17
Vancouver Island	E206618	MIDDLE QUINSAM LAKE (PE-07008)	125.487	49.9239	2015-04-15 13:15:00	10.1	1.18
Vancouver Island	E206618	MIDDLE QUINSAM LAKE (PE-07008)	125.487	49.9239	2018-08-16	10.2	1.18
Vancouver Island	E206618	MIDDLE QUINSAM LAKE (PE-07008)	125.487	49.9239	2016-11-09 10:00:00	10.4	1.19
Vancouver Island	E206618	MIDDLE QUINSAM LAKE (PE-07008)	125.487	49.9239	2013-05-16 15:01:00	10.1	1.2
Vancouver Island	E206618	MIDDLE QUINSAM LAKE (PE-07008)	125.487	49.9239	2018-08-16 00:01:00	10.1	1.2
Vancouver Island	E206618	MIDDLE QUINSAM LAKE (PE-07008)	125.487	49.9239	2016-04-20 13:18:00	10.6	1.2
Vancouver Island	E206618	MIDDLE QUINSAM LAKE (PE-07008)	125.487	49.9239	2013-10-22 10:20:00	7.72	1.21
Vancouver Island	E206618	MIDDLE QUINSAM LAKE (PE-07008)	125.487	49.9239	2013-10-16 11:24:00	9.87	1.21
Vancouver Island	E206618	MIDDLE QUINSAM LAKE (PE-07008)	125.487	49.9239	2015-04-21 13:16:00	10.2	1.21
Vancouver Island	E206618	MIDDLE QUINSAM LAKE (PE-07008)	125.487	49.9239	2015-04-21 13:15:00	10.3	1.21
Vancouver Island	E206618	MIDDLE QUINSAM LAKE (PE-07008)	125.487	49.9239	2016-04-28 13:17:00	10.7	1.21
Vancouver Island	E206618	MIDDLE QUINSAM LAKE (PE-07008)	125.487	49.9239	2013-10-29 10:21:00	9.92	1.22
Vancouver Island	E206618	MIDDLE QUINSAM LAKE (PE-07008)	125.487	49.9239	2013-10-22 10:21:00	10.2	1.23
Vancouver Island	E206618	MIDDLE QUINSAM LAKE (PE-07008)	125.487	49.9239	2013-05-16 15:00:00	10.4	1.23
Vancouver Island	E206618	MIDDLE QUINSAM LAKE (PE-07008)	125.487	49.9239	2013-10-22 10:22:00	9.4	1.24
Vancouver Island	E206618	MIDDLE QUINSAM LAKE (PE-07008)	125.487	49.9239	2016-08-09 13:15:00	10.1	1.24
Vancouver Island	E206618	MIDDLE QUINSAM LAKE (PE-07008)	125.487	49.9239	2016-05-04 13:15:00	10.4	1.24
Vancouver Island	E206618	MIDDLE QUINSAM LAKE (PE-07008)	125.487	49.9239	2014-10-29 13:15:00	8.85	1.25
Vancouver Island	E206618	MIDDLE QUINSAM LAKE (PE-07008)	125.487	49.9239	2013-10-09 13:18:00	9.76	1.25
Vancouver Island	E206618	MIDDLE QUINSAM LAKE (PE-07008)	125.487	49.9239	2013-10-29 10:20:00	10.2	1.25
Vancouver Island	E206618	MIDDLE QUINSAM LAKE (PE-07008)	125.487	49.9239	2015-04-15 13:16:00	10.1	1.26
Vancouver Island	E206618	MIDDLE QUINSAM LAKE (PE-07008)	125.487	49.9239	2013-10-16 11:22:00	10.2	1.26
Vancouver Island	E206618	MIDDLE QUINSAM LAKE (PE-07008)	125.487	49.9239	2016-04-20 13:15:00	10.9	1.26
Vancouver Island	E206618	MIDDLE QUINSAM LAKE (PE-07008)	125.487	49.9239	2013-08-28 11:20:00	11.1	1.26
Vancouver Island	E206618	MIDDLE QUINSAM LAKE (PE-07008)	125.487	49.9239	2013-09-04 11:20:00	10.8	1.27
Vancouver Island	E206618	MIDDLE QUINSAM LAKE (PE-07008)	125.487	49.9239	2016-04-28 13:18:00	10.8	1.27
Vancouver Island	E206618	MIDDLE QUINSAM LAKE (PE-07008)	125.487	49.9239	2016-04-28 13:16:00	12.2	1.27
Vancouver Island	E206618	MIDDLE QUINSAM LAKE (PE-07008)	125.487	49.9239	2013-10-09 13:16:00	9.9	1.28
Vancouver Island	E206618	MIDDLE QUINSAM LAKE (PE-07008)	125.487	49.9239	2015-05-06 13:15:00	10.4	1.28
Vancouver Island	E206618	MIDDLE QUINSAM LAKE (PE-07008)	125.487	49.9239	2015-04-30 13:16:00	10.6	1.28
Vancouver Island	E206618	MIDDLE QUINSAM LAKE (PE-07008)	125.487	49.9239	2018-07-26	10.8	1.28
Vancouver Island	E206618	MIDDLE QUINSAM LAKE (PE-07008)	125.487	49.9239	2013-08-28 11:21:00	11	1.28
Vancouver Island	E206618	MIDDLE QUINSAM LAKE (PE-07008)	125.487	49.9239	2015-05-06 13:16:00	11.1	1.28
Vancouver Island	E206618	MIDDLE QUINSAM LAKE (PE-07008)	125.487	49.9239	2018-08-02	11.6	1.28
Vancouver Island	E206618	MIDDLE QUINSAM LAKE (PE-07008)	125.487	49.9239	2013-10-16 11:21:00	9.69	1.29
Vancouver Island	E206618	MIDDLE QUINSAM LAKE (PE-07008)	125.487	49.9239	2013-10-09 13:19:00	10.3	1.29
Vancouver Island	E206618	MIDDLE QUINSAM LAKE (PE-07008)	125.487	49.9239	2016-05-11 13:15:00	11.3	1.29
Vancouver Island	E206618	MIDDLE QUINSAM LAKE (PE-07008)	125.487	49.9239	2013-10-16 11:23:00	9.58	1.3
Vancouver Island	E206618	MIDDLE QUINSAM LAKE (PE-07008)	125.487	49.9239	2016-08-25 10:00:00	10.4	1.3
Vancouver Island	E206618	MIDDLE QUINSAM LAKE (PE-07008)	125.487	49.9239	2013-09-04 11:21:00	10.7	1.3
Vancouver Island	E206618	MIDDLE QUINSAM LAKE (PE-07008)	125.487	49.9239	2013-08-22 10:20:00	11	1.3
Vancouver Island	E206618	MIDDLE QUINSAM LAKE (PE-07008)	125.487	49.9239	2016-08-17 10:00:00	11.1	1.3
Vancouver Island	E206618	MIDDLE QUINSAM LAKE (PE-07008)	125.487	49.9239	2016-08-17 10:00:00	11.1	1.3
Vancouver Island	E206618	MIDDLE QUINSAM LAKE (PE-07008)	125.487	49.9239	2016-08-25 10:00:00	11.4	1.3
Vancouver Island	E206618	MIDDLE QUINSAM LAKE (PE-07008)	125.487	49.9239	2015-05-13 13:15:00	10.6	1.31
Vancouver Island	E206618	MIDDLE QUINSAM LAKE (PE-07008)	125.487	49.9239	2015-05-13 13:16:00	10.7	1.31
Vancouver Island	E206618	MIDDLE QUINSAM LAKE (PE-07008)	125.487	49.9239	2013-08-22 10:21:00	10.9	1.31
Vancouver Island	E206618	MIDDLE QUINSAM LAKE (PE-07008)	125.487	49.9239	2017-11-16	9.93	1.32
Vancouver Island	E206618	MIDDLE QUINSAM LAKE (PE-07008)	125.487	49.9239	2013-10-29 10:22:00	10.3	1.32
Vancouver Island	E206618	MIDDLE QUINSAM LAKE (PE-07008)	125.487	49.9239	2013-11-06 10:21:00	10.3	1.32
Vancouver Island	E206618	MIDDLE QUINSAM LAKE (PE-07008)	125.487	49.9239	2013-11-06 10:20:00	10.4	1.32
Vancouver Island	E206618	MIDDLE QUINSAM LAKE (PE-07008)	125.487	49.9239	2016-08-09 13:15:00	10.5	1.32
Vancouver Island	E206618	MIDDLE QUINSAM LAKE (PE-07008)	125.487	49.9239	2015-04-30 13:15:00	10.8	1.32
Vancouver Island	E206618	MIDDLE QUINSAM LAKE (PE-07008)	125.487	49.9239	2016-08-25 10:00:00	10.8	1.32
Vancouver Island	E206618	MIDDLE QUINSAM LAKE (PE-07008)	125.487	49.9239	2013-11-06 10:22:00	10.2	1.33
Vancouver Island	E206618	MIDDLE QUINSAM LAKE (PE-07008)	125.487	49.9239	2018-08-02	11.6	1.33
Vancouver Island	E206618	MIDDLE QUINSAM LAKE (PE-07008)	125.487	49.9239	2014-10-29 13:16:00	10	1.34
Vancouver Island	E206618	MIDDLE QUINSAM LAKE (PE-07008)	125.487	49.9239	2016-11-03 13:15:00	10.3	1.34
Vancouver Island	E206618	MIDDLE QUINSAM LAKE (PE-07008)	125.487	49.9239	2017-11-16	10.6	1.34
Vancouver Island	E206618	MIDDLE QUINSAM LAKE (PE-07008)	125.487	49.9239	2016-05-11 13:15:00	11.2	1.34
Vancouver Island	E206618	MIDDLE QUINSAM LAKE (PE-07008)	125.487	49.9239	2018-07-26	11.7	1.34
Vancouver Island	E206618	MIDDLE QUINSAM LAKE (PE-07008)	125.487	49.9239	2016-05-04 13:16:00	11.9	1.34
Vancouver Island	E206618	MIDDLE QUINSAM LAKE (PE-07008)	125.487	49.9239	2016-04-28 13:15:00	12.5	1.34
Vancouver Island	E206618	MIDDLE QUINSAM LAKE (PE-07008)	125.487	49.9239	2013-08-15 10:16:00	11.4	1.35
Vancouver Island	E206618	MIDDLE QUINSAM LAKE (PE-07008)	125.487	49.9239	2017-11-08	10.5	1.36
Vancouver Island	E206618	MIDDLE QUINSAM LAKE (PE-07008)	125.487	49.9239	2017-11-16	10.9	1.36
Vancouver Island	E206618	MIDDLE QUINSAM LAKE (PE-07008)	125.487	49.9239	2016-08-17 10:00:00	11.5	1.36
Vancouver Island	E206618	MIDDLE QUINSAM LAKE (PE-07008)	125.487	49.9239	2016-05-04 13:15:00	10.7	1.37
Vancouver Island	E206618	MIDDLE QUINSAM LAKE (PE-07008)	125.487	49.9239	2017-08-15	11.1	1.37
Vancouver Island	E206618	MIDDLE QUINSAM LAKE (PE-07008)	125.487	49.9239	2017-08-15	11.6	1.37
Vancouver Island	E206618	MIDDLE QUINSAM LAKE (PE-07008)	125.487	49.9239	2017-11-08	10.6	1.38
Vancouver Island	E206618	MIDDLE QUINSAM LAKE (PE-07008)	125.487	49.9239	2017-11-16	10.9	1.38
Vancouver Island	E206618	MIDDLE QUINSAM LAKE (PE-07008)	125.487	49.9239	2013-08-15 10:15:00	11.2	1.38
Vancouver Island	E206618	MIDDLE QUINSAM LAKE (PE-07008)	125.487	49.9239	2017-11-08	10.8	1.39
Vancouver Island	E206618	MIDDLE QUINSAM LAKE (PE-07008)	125.487	49.9239	2017-11-02	10.9	1.39
Vancouver Island	E206618	MIDDLE QUINSAM LAKE (PE-07008)	125.487	49.9239	2017-11-08	10.9	1.39
Vancouver Island	E206618	MIDDLE QUINSAM LAKE (PE-07008)	125.487	49.9239	2016-08-09 13:15:00	10.4	1.4
Vancouver Island	E206618	MIDDLE QUINSAM LAKE (PE-07008)	125.487	49.9239	2013-08-07 10:16:00	10.9	1.4
Vancouver Island	E206618	MIDDLE QUINSAM LAKE (PE-07008)	125.487	49.9239	2017-11-02	11.4	1.4
Vancouver Island	E206618	MIDDLE QUINSAM LAKE (PE-07008)	125.487	49.9239	2015-08-05	11.8	1.4
Vancouver Island	E206618	MIDDLE QUINSAM LAKE (PE-07008)	125.487	49.9239	2016-11-17 10:00:00	10.8	1.41
Vancouver Island	E206618	MIDDLE QUINSAM LAKE (PE-07008)	125.487	49.9239	2017-11-02	11.6	1.41
Vancouver Island	E206618	MIDDLE QUINSAM LAKE (PE-07008)	125.487	49.9239	2017-11-02	11.8	1.41
Vancouver Island	E206618	MIDDLE QUINSAM LAKE (PE-07008)	125.487	49.9239	2016-11-17 10:00:00	11	1.42
Vancouver Island	E206618	MIDDLE QUINSAM LAKE (PE-07008)	125.487	49.9239	2015-08-05 00:01:00	11.9	1.42
Vancouver Island	E206618	MIDDLE QUINSAM LAKE (PE-07008)	125.487	49.9239	2015-08-11	12	1.42
Vancouver Island	E206618	MIDDLE QUINSAM LAKE (PE-07008)	125.487	49.9239	2015-08-18 00:01:00	13.1	1.42
Vancouver Island	E206618	MIDDLE QUINSAM LAKE (PE-07008)	125.487	49.9239	2014-08-27 13:16:00	10.8	1.43
Vancouver Island	E206618	MIDDLE QUINSAM LAKE (PE-07008)	125.487	49.9239	2017-10-25	11.4	1.43
Vancouver Island	E206618	MIDDLE QUINSAM LAKE (PE-07008)	125.487	49.9239	2016-11-17 10:00:00	11.5	1.43
Vancouver Island	E206618	MIDDLE QUINSAM LAKE (PE-07008)	125.487	49.9239	2014-10-29 13:17:00	10.3	1.44
Vancouver Island	E206618	MIDDLE QUINSAM LAKE (PE-07008)	125.487	49.9239	2016-08-09 13:15:00	10.3	1.44
Vancouver Island	E206618	MIDDLE QUINSAM LAKE (PE-07008)	125.487	49.9239	2017-10-25	11.2	1.44
Vancouver Island	E206618	MIDDLE QUINSAM LAKE (PE-07008)	125.487	49.9239	2013-08-07 10:17:00	11.8	1.44
Vancouver Island	E206618	MIDDLE QUINSAM LAKE (PE-07008)	125.487	49.9239	2014-05-07 13:15:00	11.7	1.45
Vancouver Island	E206618	MIDDLE QUINSAM LAKE (PE-07008)	125.487	49.9239	2017-10-25	11.6	1.46
Vancouver Island	E206618	MIDDLE QUINSAM LAKE (PE-07008)	125.487	49.9239	2016-05-04 13:15:00	13.4	1.46
Vancouver Island	E206618	MIDDLE QUINSAM LAKE (PE-07008)	125.487	49.9239	2015-10-26 00:02:00	11.3	1.47
Vancouver Island	E206618	MIDDLE QUINSAM LAKE (PE-07008)	125.487	49.9239	2016-11-17	11.4	1.47
Vancouver Island	E206618	MIDDLE QUINSAM LAKE (PE-07008)	125.487	49.9239	2016-08-17 10:00:00	11.8	1.47
Vancouver Island	E206618	MIDDLE QUINSAM LAKE (PE-07008)	125.487	49.9239	2014-10-29 13:18:00	10.4	1.48
Vancouver Island	E206618	MIDDLE QUINSAM LAKE (PE-07008)	125.487	49.9239	2017-08-31 13:15:00	11.7	1.48
Vancouver Island	E206618	MIDDLE QUINSAM LAKE (PE-07008)	125.487	49.9239	2015-08-26 00:01:00	12.5	1.48
Vancouver Island	E206618	MIDDLE QUINSAM LAKE (PE-07008)	125.487	49.9239	2014-08-06 13:15:00	12.8	1.48
Vancouver Island	E206618	MIDDLE QUINSAM LAKE (PE-07008)	125.487	49.9239	2016-05-04 13:15:00	13	1.48
Vancouver Island	E206618	MIDDLE QUINSAM LAKE (PE-07008)	125.487	49.9239	2013-11-06 10:23:00	11.2	1.49
Vancouver Island	E206618	MIDDLE QUINSAM LAKE (PE-07008)	125.487	49.9239	2014-07-29 13:15:00	11.4	1.49
Vancouver Island	E206618	MIDDLE QUINSAM LAKE (PE-07008)	125.487	49.9239	2017-08-31 13:15:00	11.7	1.49
Vancouver Island	E206618	MIDDLE QUINSAM LAKE (PE-07008)	125.487	49.9239	2015-08-18	12.7	1.49
Vancouver Island	E206618	MIDDLE QUINSAM LAKE (PE-07008)	125.487	49.9239	2016-11-17 10:00:00	10.7	1.5
Vancouver Island	E206618	MIDDLE QUINSAM LAKE (PE-07008)	125.487	49.9239	2014-10-22 13:15:00	10.8	1.5
Vancouver Island	E206618	MIDDLE QUINSAM LAKE (PE-07008)	125.487	49.9239	2016-08-03 13:15:00	11.9	1.5
Vancouver Island	E206618	MIDDLE QUINSAM LAKE (PE-07008)	125.487	49.9239	2016-08-25 10:00:00	11.9	1.5
Vancouver Island	E206618	MIDDLE QUINSAM LAKE (PE-07008)	125.487	49.9239	2015-08-05 00:02:00	12.4	1.5
Vancouver Island	E206618	MIDDLE QUINSAM LAKE (PE-07008)	125.487	49.9239	2018-08-02	12.8	1.5
Vancouver Island	E206618	MIDDLE QUINSAM LAKE (PE-07008)	125.487	49.9239	2014-08-12 13:16:00	12.1	1.51
Vancouver Island	E206618	MIDDLE QUINSAM LAKE (PE-07008)	125.487	49.9239	2014-08-27 13:15:00	11.3	1.52
Vancouver Island	E206618	MIDDLE QUINSAM LAKE (PE-07008)	125.487	49.9239	2015-08-26	12.1	1.52
Vancouver Island	E206618	MIDDLE QUINSAM LAKE (PE-07008)	125.487	49.9239	2015-11-02 00:01:00	12.3	1.52
Vancouver Island	E206618	MIDDLE QUINSAM LAKE (PE-07008)	125.487	49.9239	2016-05-11 13:15:00	13.4	1.52
Vancouver Island	E206618	MIDDLE QUINSAM LAKE (PE-07008)	125.487	49.9239	2014-10-22 13:17:00	10.8	1.53
Vancouver Island	E206618	MIDDLE QUINSAM LAKE (PE-07008)	125.487	49.9239	2015-10-26 00:01:00	10.9	1.53
Vancouver Island	E206618	MIDDLE QUINSAM LAKE (PE-07008)	125.487	49.9239	2017-04-27 13:15:00	13	1.53
Vancouver Island	E206618	MIDDLE QUINSAM LAKE (PE-07008)	125.487	49.9239	2016-08-03 13:15:00	12.7	1.54
Vancouver Island	E206618	MIDDLE QUINSAM LAKE (PE-07008)	125.487	49.9239	2017-10-25	10.4	1.55
Vancouver Island	E206618	MIDDLE QUINSAM LAKE (PE-07008)	125.487	49.9239	2014-10-22 13:16:00	11.1	1.55
Vancouver Island	E206618	MIDDLE QUINSAM LAKE (PE-07008)	125.487	49.9239	2014-07-29 13:16:00	11.6	1.55
Vancouver Island	E206618	MIDDLE QUINSAM LAKE (PE-07008)	125.487	49.9239	2017-05-10 13:15:00	11.8	1.55
Vancouver Island	E206618	MIDDLE QUINSAM LAKE (PE-07008)	125.487	49.9239	2014-08-06 13:16:00	12	1.55
Vancouver Island	E206618	MIDDLE QUINSAM LAKE (PE-07008)	125.487	49.9239	2015-11-02 00:02:00	12.5	1.55
Vancouver Island	E206618	MIDDLE QUINSAM LAKE (PE-07008)	125.487	49.9239	2015-10-26	11	1.56
Vancouver Island	E206618	MIDDLE QUINSAM LAKE (PE-07008)	125.487	49.9239	2015-11-02	11.9	1.56
Vancouver Island	E206618	MIDDLE QUINSAM LAKE (PE-07008)	125.487	49.9239	2015-07-28 00:01:00	12	1.56
Vancouver Island	E206618	MIDDLE QUINSAM LAKE (PE-07008)	125.487	49.9239	2016-08-03 13:15:00	11.5	1.57
Vancouver Island	E206618	MIDDLE QUINSAM LAKE (PE-07008)	125.487	49.9239	2016-08-03 13:15:00	12.4	1.57
Vancouver Island	E206618	MIDDLE QUINSAM LAKE (PE-07008)	125.487	49.9239	2017-04-27 13:15:00	13.2	1.57
Vancouver Island	E206618	MIDDLE QUINSAM LAKE (PE-07008)	125.487	49.9239	2015-07-28 00:02:00	11.8	1.58
Vancouver Island	E206618	MIDDLE QUINSAM LAKE (PE-07008)	125.487	49.9239	2017-04-11 10:00:00	12	1.58
Vancouver Island	E206618	MIDDLE QUINSAM LAKE (PE-07008)	125.487	49.9239	2014-04-16 13:15:00	12.8	1.59
Vancouver Island	E206618	MIDDLE QUINSAM LAKE (PE-07008)	125.487	49.9239	2017-05-10 13:15:00	11.8	1.6
Vancouver Island	E206618	MIDDLE QUINSAM LAKE (PE-07008)	125.487	49.9239	2017-04-20 13:15:00	12.9	1.6
Vancouver Island	E206618	MIDDLE QUINSAM LAKE (PE-07008)	125.487	49.9239	2014-04-30 13:15:00	10.8	1.61
Vancouver Island	E206618	MIDDLE QUINSAM LAKE (PE-07008)	125.487	49.9239	2017-04-11 10:00:00	11.9	1.61
Vancouver Island	E206618	MIDDLE QUINSAM LAKE (PE-07008)	125.487	49.9239	2014-04-30 13:16:00	12.1	1.61
Vancouver Island	E206618	MIDDLE QUINSAM LAKE (PE-07008)	125.487	49.9239	2014-08-12 13:15:00	12.3	1.61
Vancouver Island	E206618	MIDDLE QUINSAM LAKE (PE-07008)	125.487	49.9239	2016-05-11 13:15:00	13.7	1.61
Vancouver Island	E206618	MIDDLE QUINSAM LAKE (PE-07008)	125.487	49.9239	2015-04-21 13:17:00	12.3	1.62
Vancouver Island	E206618	MIDDLE QUINSAM LAKE (PE-07008)	125.487	49.9239	2016-11-03 13:15:00	11.9	1.63
Vancouver Island	E206618	MIDDLE QUINSAM LAKE (PE-07008)	125.487	49.9239	2015-11-02 00:03:00	12.6	1.63
Vancouver Island	E206618	MIDDLE QUINSAM LAKE (PE-07008)	125.487	49.9239	2015-04-15 13:17:00	12.9	1.63
Vancouver Island	E206618	MIDDLE QUINSAM LAKE (PE-07008)	125.487	49.9239	2018-07-26	13.1	1.64
Vancouver Island	E206618	MIDDLE QUINSAM LAKE (PE-07008)	125.487	49.9239	2014-05-07 13:16:00	13.3	1.64
Vancouver Island	E206618	MIDDLE QUINSAM LAKE (PE-07008)	125.487	49.9239	2014-10-22 13:18:00	11.3	1.65
Vancouver Island	E206618	MIDDLE QUINSAM LAKE (PE-07008)	125.487	49.9239	2017-04-20 13:15:00	12.8	1.65
Vancouver Island	E206618	MIDDLE QUINSAM LAKE (PE-07008)	125.487	49.9239	2015-08-18 00:02:00	14.2	1.67
Vancouver Island	E206618	MIDDLE QUINSAM LAKE (PE-07008)	125.487	49.9239	2016-11-03 13:15:00	12.9	1.68
Vancouver Island	E206618	MIDDLE QUINSAM LAKE (PE-07008)	125.487	49.9239	2018-05-31 13:15:00	13.8	1.68
Vancouver Island	E206618	MIDDLE QUINSAM LAKE (PE-07008)	125.487	49.9239	2016-10-27 13:15:00	12.9	1.69
Vancouver Island	E206618	MIDDLE QUINSAM LAKE (PE-07008)	125.487	49.9239	2015-08-11 00:01:00	14	1.69
Vancouver Island	E206618	MIDDLE QUINSAM LAKE (PE-07008)	125.487	49.9239	2014-04-30 13:16:00	13.2	1.71
Vancouver Island	E206618	MIDDLE QUINSAM LAKE (PE-07008)	125.487	49.9239	2014-04-16 13:16:00	14	1.71
Vancouver Island	E206618	MIDDLE QUINSAM LAKE (PE-07008)	125.487	49.9239	2018-05-31 13:15:00	14.5	1.72
Vancouver Island	E206618	MIDDLE QUINSAM LAKE (PE-07008)	125.487	49.9239	2016-11-03 13:15:00	12.7	1.73
Vancouver Island	E206618	MIDDLE QUINSAM LAKE (PE-07008)	125.487	49.9239	2018-05-31 13:15:00	14.3	1.74
Vancouver Island	E206618	MIDDLE QUINSAM LAKE (PE-07008)	125.487	49.9239	2015-05-13 13:17:00	13.6	1.75
Vancouver Island	E206618	MIDDLE QUINSAM LAKE (PE-07008)	125.487	49.9239	2014-04-22 13:16:00	14.3	1.75
Vancouver Island	E206618	MIDDLE QUINSAM LAKE (PE-07008)	125.487	49.9239	2016-10-27 13:15:00	13.4	1.77
Vancouver Island	E206618	MIDDLE QUINSAM LAKE (PE-07008)	125.487	49.9239	2017-04-20 13:15:00	14.4	1.77
Vancouver Island	E206618	MIDDLE QUINSAM LAKE (PE-07008)	125.487	49.9239	2018-08-16 00:02:00	13.5	1.78
Vancouver Island	E206618	MIDDLE QUINSAM LAKE (PE-07008)	125.487	49.9239	2014-04-30 13:15:00	13.6	1.78
Vancouver Island	E206618	MIDDLE QUINSAM LAKE (PE-07008)	125.487	49.9239	2014-04-22 13:15:00	13.8	1.79
Vancouver Island	E206618	MIDDLE QUINSAM LAKE (PE-07008)	125.487	49.9239	2015-04-30 13:17:00	13.2	1.8
Vancouver Island	E206618	MIDDLE QUINSAM LAKE (PE-07008)	125.487	49.9239	2016-10-27 13:15:00	14.2	1.82
Vancouver Island	E206618	MIDDLE QUINSAM LAKE (PE-07008)	125.487	49.9239	2017-05-10 13:15:00	13.6	1.84
Vancouver Island	E206618	MIDDLE QUINSAM LAKE (PE-07008)	125.487	49.9239	2017-04-27 13:15:00	14.8	1.85
Vancouver Island	E206618	MIDDLE QUINSAM LAKE (PE-07008)	125.487	49.9239	2017-04-11 10:00:00	14.2	1.88
Vancouver Island	E206618	MIDDLE QUINSAM LAKE (PE-07008)	125.487	49.9239	2012-07-25 09:32:00	14.8	1.89
Vancouver Island	E206618	MIDDLE QUINSAM LAKE (PE-07008)	125.487	49.9239	2015-08-26 00:02:00	13.6	1.91
Vancouver Island	E206618	MIDDLE QUINSAM LAKE (PE-07008)	125.487	49.9239	2016-10-27 13:15:00	12.8	1.92
Vancouver Island	E206618	MIDDLE QUINSAM LAKE (PE-07008)	125.487	49.9239	2015-05-06 13:17:00	14.7	1.94
Vancouver Island	E206618	MIDDLE QUINSAM LAKE (PE-07008)	125.487	49.9239	2017-08-31 13:15:00	13.8	1.99
Vancouver Island	E206618	MIDDLE QUINSAM LAKE (PE-07008)	125.487	49.9239	2015-07-28 00:03:00	14.3	1.99
Vancouver Island	E206618	MIDDLE QUINSAM LAKE (PE-07008)	125.487	49.9239	2015-08-11 00:02:00	15.9	2.04
Vancouver Island	E206618	MIDDLE QUINSAM LAKE (PE-07008)	125.487	49.9239	2012-05-30 00:02:00	14.8	2.06
Vancouver Island	E206618	MIDDLE QUINSAM LAKE (PE-07008)	125.487	49.9239	2018-08-02	16.3	2.06
Vancouver Island	E206618	MIDDLE QUINSAM LAKE (PE-07008)	125.487	49.9239	2017-08-15	15.4	2.1
Vancouver Island	E206618	MIDDLE QUINSAM LAKE (PE-07008)	125.487	49.9239	2012-08-22 09:32:00	15.3	2.12
Vancouver Island	E206618	MIDDLE QUINSAM LAKE (PE-07008)	125.487	49.9239	2013-08-07 10:18:00	14.3	2.14
Vancouver Island	E206618	MIDDLE QUINSAM LAKE (PE-07008)	125.487	49.9239	2013-08-15 10:17:00	16.1	2.16
Vancouver Island	E206618	MIDDLE QUINSAM LAKE (PE-07008)	125.487	49.9239	2018-07-26	15.5	2.17
Vancouver Island	E206618	MIDDLE QUINSAM LAKE (PE-07008)	125.487	49.9239	2015-08-26 00:03:00	17.5	2.2
Vancouver Island	E206618	MIDDLE QUINSAM LAKE (PE-07008)	125.487	49.9239	2018-08-16 00:03:00	15.6	2.23
Vancouver Island	E206618	MIDDLE QUINSAM LAKE (PE-07008)	125.487	49.9239	2018-05-31 13:15:00	16.6	2.24
Vancouver Island	E206618	MIDDLE QUINSAM LAKE (PE-07008)	125.487	49.9239	2015-08-18 00:03:00	17.8	2.24
Vancouver Island	E206618	MIDDLE QUINSAM LAKE (PE-07008)	125.487	49.9239	2015-08-05 00:03:00	16.8	2.25
Vancouver Island	E206618	MIDDLE QUINSAM LAKE (PE-07008)	125.487	49.9239	2012-05-30 00:03:00	16.5	2.32
Vancouver Island	E206618	MIDDLE QUINSAM LAKE (PE-07008)	125.487	49.9239	2015-05-06 13:18:00	16.7	2.32
Vancouver Island	E206618	MIDDLE QUINSAM LAKE (PE-07008)	125.487	49.9239	2012-08-22 09:33:00	16.2	2.35
Vancouver Island	E206618	MIDDLE QUINSAM LAKE (PE-07008)	125.487	49.9239	2015-05-13 13:18:00	16.5	2.35
Vancouver Island	E206618	MIDDLE QUINSAM LAKE (PE-07008)	125.487	49.9239	2015-07-28 00:04:00	16.8	2.36
Vancouver Island	E206618	MIDDLE QUINSAM LAKE (PE-07008)	125.487	49.9239	2014-08-12 13:17:00	17.3	2.45
Vancouver Island	E206618	MIDDLE QUINSAM LAKE (PE-07008)	125.487	49.9239	2014-05-07 13:17:00	17.8	2.49
Vancouver Island	E206618	MIDDLE QUINSAM LAKE (PE-07008)	125.487	49.9239	2013-04-26 15:03:00	17.7	2.52
Vancouver Island	E206618	MIDDLE QUINSAM LAKE (PE-07008)	125.487	49.9239	2012-07-25 09:33:00	17.8	2.55
Vancouver Island	E206618	MIDDLE QUINSAM LAKE (PE-07008)	125.487	49.9239	2015-04-15 13:18:00	17.3	2.65
Vancouver Island	E206618	MIDDLE QUINSAM LAKE (PE-07008)	125.487	49.9239	2015-10-26 00:03:00	22.6	2.67
Vancouver Island	E206618	MIDDLE QUINSAM LAKE (PE-07008)	125.487	49.9239	2015-04-21 13:18:00	17.4	2.7
Vancouver Island	E206618	MIDDLE QUINSAM LAKE (PE-07008)	125.487	49.9239	2017-08-31 13:15:00	18.2	2.72
Vancouver Island	E206618	MIDDLE QUINSAM LAKE (PE-07008)	125.487	49.9239	2013-08-28 11:22:00	18.6	2.72
Vancouver Island	E206618	MIDDLE QUINSAM LAKE (PE-07008)	125.487	49.9239	2013-05-23 15:02:00	18.3	2.75
Vancouver Island	E206618	MIDDLE QUINSAM LAKE (PE-07008)	125.487	49.9239	2015-04-30 13:18:00	19	2.75
Vancouver Island	E206618	MIDDLE QUINSAM LAKE (PE-07008)	125.487	49.9239	2014-04-22 13:17:00	19.3	2.76
Vancouver Island	E206618	MIDDLE QUINSAM LAKE (PE-07008)	125.487	49.9239	2017-08-15	18.6	2.78
Vancouver Island	E206618	MIDDLE QUINSAM LAKE (PE-07008)	125.487	49.9239	2015-08-11 00:03:00	19.6	2.8
Vancouver Island	E206618	MIDDLE QUINSAM LAKE (PE-07008)	125.487	49.9239	2014-04-30 13:17:00	19.5	2.89
Vancouver Island	E206618	MIDDLE QUINSAM LAKE (PE-07008)	125.487	49.9239	2011-08-12 00:20:00	18.5	2.94
Vancouver Island	E206618	MIDDLE QUINSAM LAKE (PE-07008)	125.487	49.9239	2013-05-16 15:02:00	19.9	2.98
Vancouver Island	E206618	MIDDLE QUINSAM LAKE (PE-07008)	125.487	49.9239	2013-09-04 11:22:00	20.5	2.98
Vancouver Island	E206618	MIDDLE QUINSAM LAKE (PE-07008)	125.487	49.9239	2014-04-16 13:17:00	20.6	2.99
Vancouver Island	E206618	MIDDLE QUINSAM LAKE (PE-07008)	125.487	49.9239	2013-08-22 10:22:00	20.1	3.02
Vancouver Island	E206618	MIDDLE QUINSAM LAKE (PE-07008)	125.487	49.9239	2014-08-27 13:17:00	22.1	3.29
Vancouver Island	E206618	MIDDLE QUINSAM LAKE (PE-07008)	125.487	49.9239	2017-04-27 13:15:00	23	3.47
Vancouver Island	E206618	MIDDLE QUINSAM LAKE (PE-07008)	125.487	49.9239	2017-05-10 13:15:00	24.6	3.76
Vancouver Island	E206618	MIDDLE QUINSAM LAKE (PE-07008)	125.487	49.9239	2014-07-29 13:17:00	23.6	3.85
Vancouver Island	E206618	MIDDLE QUINSAM LAKE (PE-07008)	125.487	49.9239	2014-08-06 13:17:00	25	4
Vancouver Island	E206618	MIDDLE QUINSAM LAKE (PE-07008)	125.487	49.9239	2014-04-30 13:17:00	25.8	4.11
Vancouver Island	E206618	MIDDLE QUINSAM LAKE (PE-07008)	125.487	49.9239	2017-04-20 13:15:00	27.5	4.58
Vancouver Island	E206618	MIDDLE QUINSAM LAKE (PE-07008)	125.487	49.9239	2014-08-27 13:18:00	29.6	4.87
Vancouver Island	E206618	MIDDLE QUINSAM LAKE (PE-07008)	125.487	49.9239	2013-04-26 15:04:00	32.5	5.65
Vancouver Island	E206618	MIDDLE QUINSAM LAKE (PE-07008)	125.487	49.9239	2013-10-29 10:23:00	34.8	5.84
Vancouver Island	E206618	MIDDLE QUINSAM LAKE (PE-07008)	125.487	49.9239	2013-10-22 10:23:00	34.4	6
Vancouver Island	E206618	MIDDLE QUINSAM LAKE (PE-07008)	125.487	49.9239	2013-10-16 11:25:00	35.9	6.03
Vancouver Island	E206618	MIDDLE QUINSAM LAKE (PE-07008)	125.487	49.9239	2013-10-09 13:20:00	37	6.21
Vancouver Island	E206618	MIDDLE QUINSAM LAKE (PE-07008)	125.487	49.9239	2013-08-22 10:25:00	36	6.31
Vancouver Island	E206618	MIDDLE QUINSAM LAKE (PE-07008)	125.487	49.9239	2013-08-15 10:18:00	37.6	6.42
Vancouver Island	E206618	MIDDLE QUINSAM LAKE (PE-07008)	125.487	49.9239	2013-09-04 11:23:00	37.6	6.42
Vancouver Island	E206618	MIDDLE QUINSAM LAKE (PE-07008)	125.487	49.9239	2013-08-07 10:19:00	37.8	6.46
Vancouver Island	E206618	MIDDLE QUINSAM LAKE (PE-07008)	125.487	49.9239	2013-08-28 11:23:00	38	6.55
Vancouver Island	E206618	MIDDLE QUINSAM LAKE (PE-07008)	125.487	49.9239	2017-04-11 10:00:00	37	6.8
Vancouver Island	E206618	MIDDLE QUINSAM LAKE (PE-07008)	125.487	49.9239	2014-08-12 13:18:00	39.9	6.81
Vancouver Island	E206618	MIDDLE QUINSAM LAKE (PE-07008)	125.487	49.9239	2014-08-06 13:18:00	40.7	6.9
Vancouver Island	E206618	MIDDLE QUINSAM LAKE (PE-07008)	125.487	49.9239	2014-07-29 13:18:00	38	7.06
Vancouver Island	E206618	MIDDLE QUINSAM LAKE (PE-07008)	125.487	49.9239	2011-08-12 00:30:00	39.3	7.27
Vancouver Island	E206618	MIDDLE QUINSAM LAKE (PE-07008)	125.487	49.9239	2014-04-30 13:18:00	43.6	8.02
Vancouver Island	E206618	MIDDLE QUINSAM LAKE (PE-07008)	125.487	49.9239	2014-05-07 13:18:00	49.8	8.75
Vancouver Island	E206618	MIDDLE QUINSAM LAKE (PE-07008)	125.487	49.9239	2014-04-30 13:18:00	54.3	9.71
Vancouver Island	E206618	MIDDLE QUINSAM LAKE (PE-07008)	125.487	49.9239	2014-04-16 13:18:00	53.1	9.79
Vancouver Island	E206618	MIDDLE QUINSAM LAKE (PE-07008)	125.487	49.9239	2013-05-23 15:03:00	54.8	10.6
Vancouver Island	E206618	MIDDLE QUINSAM LAKE (PE-07008)	125.487	49.9239	2014-04-22 13:18:00	60.7	11
Vancouver Island	E206618	MIDDLE QUINSAM LAKE (PE-07008)	125.487	49.9239	2013-05-16 15:03:00	72.5	13.7
Vancouver Island	E206619	LONG LAKE	125.47	49.915	2016-11-09 12:00:00	3.75	0.693
Vancouver Island	E206619	LONG LAKE	125.47	49.915	2016-08-09	3.64	0.722
Vancouver Island	E206619	LONG LAKE	125.47	49.915	2016-08-09	3.69	0.746
Vancouver Island	E206619	LONG LAKE	125.47	49.915	2015-10-13 00:02:00	5.31	0.961
Vancouver Island	E206619	LONG LAKE	125.47	49.915	2015-10-13 00:01:00	5.27	0.962
Vancouver Island	E206619	LONG LAKE	125.47	49.915	2016-11-03 13:15:00	5.62	0.975
Vancouver Island	E206619	LONG LAKE	125.47	49.915	2015-10-13 00:03:00	5.46	0.993
Vancouver Island	E206619	LONG LAKE	125.47	49.915	2015-10-13	4.63	1.02
Vancouver Island	E206619	LONG LAKE	125.47	49.915	2016-10-27 13:15:00	5.75	1.06
Vancouver Island	E206619	LONG LAKE	125.47	49.915	2016-08-09	4.72	1.07
Vancouver Island	E206619	LONG LAKE	125.47	49.915	2013-04-25 15:02:00	9.32	1.08
Vancouver Island	E206619	LONG LAKE	125.47	49.915	2016-08-09	4.82	1.09
Vancouver Island	E206619	LONG LAKE	125.47	49.915	2013-04-25 15:03:00	9.31	1.12
Vancouver Island	E206619	LONG LAKE	125.47	49.915	2013-04-25 15:04:00	9.29	1.13
Vancouver Island	E206619	LONG LAKE	125.47	49.915	2013-04-25 15:01:00	9.59	1.13
Vancouver Island	E206619	LONG LAKE	125.47	49.915	2013-04-30 15:06:00	9.93	1.16
Vancouver Island	E206619	LONG LAKE	125.47	49.915	2013-04-30 15:03:00	9.82	1.19
Vancouver Island	E206619	LONG LAKE	125.47	49.915	2013-04-30 15:02:00	11.8	1.19
Vancouver Island	E206619	LONG LAKE	125.47	49.915	2016-11-03 13:15:00	7.75	1.2
Vancouver Island	E206619	LONG LAKE	125.47	49.915	2013-04-30 15:01:00	9.8	1.2
Vancouver Island	E206619	LONG LAKE	125.47	49.915	2013-04-30 15:04:00	9.95	1.23
Vancouver Island	E206619	LONG LAKE	125.47	49.915	2017-11-16	8.17	1.31
Vancouver Island	E206619	LONG LAKE	125.47	49.915	2016-10-27 13:15:00	8.43	1.33
Vancouver Island	E206619	LONG LAKE	125.47	49.915	2015-10-13 00:02:00	10.8	1.42
Vancouver Island	E206619	LONG LAKE	125.47	49.915	2014-11-04 13:15:00	9.26	1.46
Vancouver Island	E206619	LONG LAKE	125.47	49.915	2015-10-13 00:01:00	11.2	1.48
Vancouver Island	E206619	LONG LAKE	125.47	49.915	2014-10-29 13:16:00	9.86	1.51
Vancouver Island	E206619	LONG LAKE	125.47	49.915	2015-10-13	11	1.53
Vancouver Island	E206619	LONG LAKE	125.47	49.915	2014-11-04 13:19:00	11.2	1.58
Vancouver Island	E206619	LONG LAKE	125.47	49.915	2014-11-04 13:16:00	12.2	1.71
Vancouver Island	E206619	LONG LAKE	125.47	49.915	2014-11-12 13:19:00	13.6	1.75
Vancouver Island	E206619	LONG LAKE	125.47	49.915	2014-11-12 13:15:00	15.1	1.83
Vancouver Island	E206619	LONG LAKE	125.47	49.915	2014-11-12 13:16:00	14.8	1.84
Vancouver Island	E206619	LONG LAKE	125.47	49.915	2016-10-27 13:15:00	12.7	1.86
Vancouver Island	E206619	LONG LAKE	125.47	49.915	2014-08-07	14	1.86
Vancouver Island	E206619	LONG LAKE	125.47	49.915	2016-11-09 12:00:00	13.7	1.91
Vancouver Island	E206619	LONG LAKE	125.47	49.915	2014-10-29 13:15:00	14.4	2.04
Vancouver Island	E206619	LONG LAKE	125.47	49.915	2017-04-27 12:00:00	16.1	2.05
Vancouver Island	E206619	LONG LAKE	125.47	49.915	2014-10-29 13:19:00	14.4	2.13
Vancouver Island	E206619	LONG LAKE	125.47	49.915	2013-11-08 15:14:00	17.7	2.2
Vancouver Island	E206619	LONG LAKE	125.47	49.915	2013-11-08 15:00:00	16.9	2.3
Vancouver Island	E206619	LONG LAKE	125.47	49.915	2014-11-17 13:17:00	17.3	2.3
Vancouver Island	E206619	LONG LAKE	125.47	49.915	2016-11-22 12:00:00	18.6	2.31
Vancouver Island	E206619	LONG LAKE	125.47	49.915	2014-11-17 13:19:00	17.6	2.37
Vancouver Island	E206619	LONG LAKE	125.47	49.915	2013-05-01 00:16:00	18.1	2.39
Vancouver Island	E206619	LONG LAKE	125.47	49.915	2014-11-17 13:16:00	16.5	2.4
Vancouver Island	E206619	LONG LAKE	125.47	49.915	2014-11-17 13:15:00	17.2	2.4
Vancouver Island	E206619	LONG LAKE	125.47	49.915	2013-11-08 15:04:00	18.5	2.43
Vancouver Island	E206619	LONG LAKE	125.47	49.915	2013-11-08 15:01:00	17.5	2.46
Vancouver Island	E206619	LONG LAKE	125.47	49.915	2015-10-13 00:03:00	17.8	2.46
Vancouver Island	E206619	LONG LAKE	125.47	49.915	2013-11-08 15:05:00	18.4	2.51
Vancouver Island	E206619	LONG LAKE	125.47	49.915	2016-11-03 13:15:00	18.6	2.51
Vancouver Island	E206619	LONG LAKE	125.47	49.915	2017-05-10 13:16:00	19.4	2.53
Vancouver Island	E206619	LONG LAKE	125.47	49.915	2014-04-15 13:19:00	21.6	2.58
Vancouver Island	E206619	LONG LAKE	125.47	49.915	2017-05-10 13:15:00	19.1	2.59
Vancouver Island	E206619	LONG LAKE	125.47	49.915	2014-04-15 13:15:00	21.1	2.59
Vancouver Island	E206619	LONG LAKE	125.47	49.915	2015-04-21 13:15:00	18.1	2.6
Vancouver Island	E206619	LONG LAKE	125.47	49.915	2013-10-22 12:01:00	21	2.6
Vancouver Island	E206619	LONG LAKE	125.47	49.915	2012-05-30	22.9	2.6
Vancouver Island	E206619	LONG LAKE	125.47	49.915	2014-05-06 13:15:00	19.1	2.61
Vancouver Island	E206619	LONG LAKE	125.47	49.915	2015-04-29 13:15:00	21.5	2.61
Vancouver Island	E206619	LONG LAKE	125.47	49.915	2015-04-21 13:19:00	21.6	2.65
Vancouver Island	E206619	LONG LAKE	125.47	49.915	2014-05-06 13:20:00	19.5	2.66
Vancouver Island	E206619	LONG LAKE	125.47	49.915	2015-04-29 13:19:00	22.1	2.67
Vancouver Island	E206619	LONG LAKE	125.47	49.915	2013-08-07 10:22:00	23.2	2.67
Vancouver Island	E206619	LONG LAKE	125.47	49.915	2013-10-22 12:04:00	20.1	2.68
Vancouver Island	E206619	LONG LAKE	125.47	49.915	2014-11-12 13:17:00	25.1	2.69
Vancouver Island	E206619	LONG LAKE	125.47	49.915	2013-10-22 12:05:00	21.9	2.7
Vancouver Island	E206619	LONG LAKE	125.47	49.915	2013-10-16 00:01:00	20.9	2.75
Vancouver Island	E206619	LONG LAKE	125.47	49.915	2013-10-22 12:07:00	21	2.75
Vancouver Island	E206619	LONG LAKE	125.47	49.915	2013-08-07 10:16:00	22.2	2.75
Vancouver Island	E206619	LONG LAKE	125.47	49.915	2013-10-29 10:17:00	22.4	2.76
Vancouver Island	E206619	LONG LAKE	125.47	49.915	2013-10-29 10:16:00	23	2.76
Vancouver Island	E206619	LONG LAKE	125.47	49.915	2013-10-16	21	2.77
Vancouver Island	E206619	LONG LAKE	125.47	49.915	2013-10-29 10:22:00	21.8	2.77
Vancouver Island	E206619	LONG LAKE	125.47	49.915	2013-10-29 10:21:00	21.9	2.77
Vancouver Island	E206619	LONG LAKE	125.47	49.915	2013-10-22 12:06:00	22	2.77
Vancouver Island	E206619	LONG LAKE	125.47	49.915	2014-04-15 13:20:00	22.3	2.77
Vancouver Island	E206619	LONG LAKE	125.47	49.915	2013-10-29 10:20:00	21.2	2.79
Vancouver Island	E206619	LONG LAKE	125.47	49.915	2013-10-16 00:05:00	21.5	2.8
Vancouver Island	E206619	LONG LAKE	125.47	49.915	2013-10-16 00:06:00	21.4	2.81
Vancouver Island	E206619	LONG LAKE	125.47	49.915	2013-10-16 00:04:00	20.8	2.85
Vancouver Island	E206619	LONG LAKE	125.47	49.915	2013-10-09 09:48:00	21.6	2.85
Vancouver Island	E206619	LONG LAKE	125.47	49.915	2013-08-07 10:20:00	22.5	2.85
Vancouver Island	E206619	LONG LAKE	125.47	49.915	2015-05-20 13:15:00	24.3	2.85
Vancouver Island	E206619	LONG LAKE	125.47	49.915	2015-05-20 13:19:00	24.5	2.86
Vancouver Island	E206619	LONG LAKE	125.47	49.915	2013-10-22 12:00:00	21.4	2.89
Vancouver Island	E206619	LONG LAKE	125.47	49.915	2013-08-07 10:21:00	21.5	2.89
Vancouver Island	E206619	LONG LAKE	125.47	49.915	2013-10-09 09:53:00	22.8	2.89
Vancouver Island	E206619	LONG LAKE	125.47	49.915	2013-08-16 10:20:00	23	2.91
Vancouver Island	E206619	LONG LAKE	125.47	49.915	2016-04-20 13:15:00	24.4	2.91
Vancouver Island	E206619	LONG LAKE	125.47	49.915	2013-10-09 09:46:00	22.1	2.92
Vancouver Island	E206619	LONG LAKE	125.47	49.915	2013-08-16 10:16:00	23.3	2.92
Vancouver Island	E206619	LONG LAKE	125.47	49.915	2012-07-24 11:00:00	23.3	2.93
Vancouver Island	E206619	LONG LAKE	125.47	49.915	2013-10-09 09:52:00	22.6	2.96
Vancouver Island	E206619	LONG LAKE	125.47	49.915	2013-08-16 10:21:00	23.2	2.97
Vancouver Island	E206619	LONG LAKE	125.47	49.915	2015-05-06 13:15:00	21.1	3
Vancouver Island	E206619	LONG LAKE	125.47	49.915	2013-08-16 10:22:00	23.7	3.02
Vancouver Island	E206619	LONG LAKE	125.47	49.915	2015-05-06 13:19:00	24.2	3.02
Vancouver Island	E206619	LONG LAKE	125.47	49.915	2014-04-29 13:15:00	24.9	3.03
Vancouver Island	E206619	LONG LAKE	125.47	49.915	2016-04-20 13:19:00	24	3.04
Vancouver Island	E206619	LONG LAKE	125.47	49.915	2014-04-22 13:15:00	27.5	3.04
Vancouver Island	E206619	LONG LAKE	125.47	49.915	2015-05-13 13:19:00	23.7	3.05
Vancouver Island	E206619	LONG LAKE	125.47	49.915	2013-10-09 09:51:00	22.6	3.06
Vancouver Island	E206619	LONG LAKE	125.47	49.915	2013-08-21 10:03:00	24.6	3.09
Vancouver Island	E206619	LONG LAKE	125.47	49.915	2011-08-12 00:15:00	26.8	3.1
Vancouver Island	E206619	LONG LAKE	125.47	49.915	2016-08-09 13:15:00	22.4	3.11
Vancouver Island	E206619	LONG LAKE	125.47	49.915	2013-08-21 10:00:00	23.3	3.12
Vancouver Island	E206619	LONG LAKE	125.47	49.915	2016-04-28	27.8	3.12
Vancouver Island	E206619	LONG LAKE	125.47	49.915	2013-08-16 10:17:00	28.9	3.14
Vancouver Island	E206619	LONG LAKE	125.47	49.915	2014-04-22 13:20:00	27.5	3.15
Vancouver Island	E206619	LONG LAKE	125.47	49.915	2017-11-16	24.3	3.18
Vancouver Island	E206619	LONG LAKE	125.47	49.915	2014-07-22 13:15:00	27	3.18
Vancouver Island	E206619	LONG LAKE	125.47	49.915	2013-08-27 00:04:00	25.5	3.19
Vancouver Island	E206619	LONG LAKE	125.47	49.915	2015-05-13 13:15:00	24.1	3.2
Vancouver Island	E206619	LONG LAKE	125.47	49.915	2013-08-21 10:01:00	24.6	3.2
Vancouver Island	E206619	LONG LAKE	125.47	49.915	2013-08-27	24.9	3.2
Vancouver Island	E206619	LONG LAKE	125.47	49.915	2013-08-21 10:16:00	23.6	3.22
Vancouver Island	E206619	LONG LAKE	125.47	49.915	2013-08-27 00:06:00	25.3	3.22
Vancouver Island	E206619	LONG LAKE	125.47	49.915	2016-04-13 13:15:00	25.5	3.22
Vancouver Island	E206619	LONG LAKE	125.47	49.915	2015-05-20 13:16:00	30.2	3.23
Vancouver Island	E206619	LONG LAKE	125.47	49.915	2013-08-27 00:05:00	24.6	3.24
Vancouver Island	E206619	LONG LAKE	125.47	49.915	2014-04-29 13:20:00	25.8	3.28
Vancouver Island	E206619	LONG LAKE	125.47	49.915	2012-07-24 11:01:00	27.4	3.28
Vancouver Island	E206619	LONG LAKE	125.47	49.915	2012-08-23 11:00:00	29.3	3.28
Vancouver Island	E206619	LONG LAKE	125.47	49.915	2016-08-17 12:00:00	25.5	3.3
Vancouver Island	E206619	LONG LAKE	125.47	49.915	2014-04-29 13:16:00	27.8	3.3
Vancouver Island	E206619	LONG LAKE	125.47	49.915	2014-05-06 13:19:00	23.6	3.32
Vancouver Island	E206619	LONG LAKE	125.47	49.915	2014-07-22 13:19:00	27.3	3.35
Vancouver Island	E206619	LONG LAKE	125.47	49.915	2015-04-29 13:16:00	28.7	3.35
Vancouver Island	E206619	LONG LAKE	125.47	49.915	2016-05-11 13:15:00	29	3.35
Vancouver Island	E206619	LONG LAKE	125.47	49.915	2016-08-09 13:15:00	23.1	3.38
Vancouver Island	E206619	LONG LAKE	125.47	49.915	2016-08-30 12:00:00	28.2	3.38
Vancouver Island	E206619	LONG LAKE	125.47	49.915	2016-04-28 00:04:00	29.3	3.38
Vancouver Island	E206619	LONG LAKE	125.47	49.915	2013-08-07 10:17:00	28.2	3.39
Vancouver Island	E206619	LONG LAKE	125.47	49.915	2014-08-19 13:19:00	27.1	3.4
Vancouver Island	E206619	LONG LAKE	125.47	49.915	2014-08-06 13:15:00	27.3	3.4
Vancouver Island	E206619	LONG LAKE	125.47	49.915	2016-04-13 13:19:00	26.5	3.41
Vancouver Island	E206619	LONG LAKE	125.47	49.915	2012-05-30 00:01:00	36.6	3.41
Vancouver Island	E206619	LONG LAKE	125.47	49.915	2017-05-10 13:15:00	27	3.42
Vancouver Island	E206619	LONG LAKE	125.47	49.915	2016-08-30 12:00:00	27.4	3.44
Vancouver Island	E206619	LONG LAKE	125.47	49.915	2013-08-27 00:01:00	28.6	3.44
Vancouver Island	E206619	LONG LAKE	125.47	49.915	2016-05-11 13:19:00	28.3	3.45
Vancouver Island	E206619	LONG LAKE	125.47	49.915	2014-08-06 13:16:00	29.6	3.46
Vancouver Island	E206619	LONG LAKE	125.47	49.915	2012-08-23 11:01:00	32.2	3.46
Vancouver Island	E206619	LONG LAKE	125.47	49.915	2014-07-29 13:15:00	26.2	3.48
Vancouver Island	E206619	LONG LAKE	125.47	49.915	2016-08-25 12:00:00	28	3.48
Vancouver Island	E206619	LONG LAKE	125.47	49.915	2014-08-19 13:15:00	28.5	3.48
Vancouver Island	E206619	LONG LAKE	125.47	49.915	2013-08-21 10:20:00	29.6	3.49
Vancouver Island	E206619	LONG LAKE	125.47	49.915	2013-05-01 00:17:00	32.9	3.51
Vancouver Island	E206619	LONG LAKE	125.47	49.915	2016-08-17 12:00:00	26.8	3.52
Vancouver Island	E206619	LONG LAKE	125.47	49.915	2017-10-25	26.9	3.55
Vancouver Island	E206619	LONG LAKE	125.47	49.915	2014-07-29 13:19:00	26.5	3.56
Vancouver Island	E206619	LONG LAKE	125.47	49.915	2016-05-04 13:15:00	29.2	3.56
Vancouver Island	E206619	LONG LAKE	125.47	49.915	2014-08-12 13:19:00	27	3.57
Vancouver Island	E206619	LONG LAKE	125.47	49.915	2016-05-04 13:17:00	32.2	3.58
Vancouver Island	E206619	LONG LAKE	125.47	49.915	2014-08-12 13:16:00	29.6	3.59
Vancouver Island	E206619	LONG LAKE	125.47	49.915	2016-08-25 12:00:00	27.4	3.6
Vancouver Island	E206619	LONG LAKE	125.47	49.915	2014-08-19 13:16:00	31	3.61
Vancouver Island	E206619	LONG LAKE	125.47	49.915	2014-05-06 13:16:00	28.3	3.64
Vancouver Island	E206619	LONG LAKE	125.47	49.915	2014-07-29 13:16:00	29.2	3.65
Vancouver Island	E206619	LONG LAKE	125.47	49.915	2014-08-12 13:15:00	27.7	3.66
Vancouver Island	E206619	LONG LAKE	125.47	49.915	2014-08-06 13:19:00	28.8	3.66
Vancouver Island	E206619	LONG LAKE	125.47	49.915	2014-07-22 13:16:00	32.3	3.72
Vancouver Island	E206619	LONG LAKE	125.47	49.915	2016-11-09 12:00:00	32.9	3.72
Vancouver Island	E206619	LONG LAKE	125.47	49.915	2015-11-02 00:01:00	28.6	3.74
Vancouver Island	E206619	LONG LAKE	125.47	49.915	2016-08-25 12:01:00	26.9	3.75
Vancouver Island	E206619	LONG LAKE	125.47	49.915	2017-04-27 12:00:00	33.2	3.77
Vancouver Island	E206619	LONG LAKE	125.47	49.915	2014-04-22 13:19:00	33	3.79
Vancouver Island	E206619	LONG LAKE	125.47	49.915	2014-04-29 13:19:00	28	3.8
Vancouver Island	E206619	LONG LAKE	125.47	49.915	2014-10-22 13:16:00	29.4	3.8
Vancouver Island	E206619	LONG LAKE	125.47	49.915	2016-11-03 13:15:00	31	3.8
Vancouver Island	E206619	LONG LAKE	125.47	49.915	2014-11-04 13:17:00	31.7	3.8
Vancouver Island	E206619	LONG LAKE	125.47	49.915	2016-11-22 12:00:00	32.9	3.8
Vancouver Island	E206619	LONG LAKE	125.47	49.915	2017-11-08	28.4	3.82
Vancouver Island	E206619	LONG LAKE	125.47	49.915	2015-05-06 13:16:00	33	3.85
Vancouver Island	E206619	LONG LAKE	125.47	49.915	2014-10-22 13:15:00	29.4	3.88
Vancouver Island	E206619	LONG LAKE	125.47	49.915	2015-11-02 00:04:00	30.6	3.89
Vancouver Island	E206619	LONG LAKE	125.47	49.915	2015-05-13 13:16:00	32.3	3.92
Vancouver Island	E206619	LONG LAKE	125.47	49.915	2015-05-20 13:17:00	39.8	3.96
Vancouver Island	E206619	LONG LAKE	125.47	49.915	2015-11-02	30.7	3.97
Vancouver Island	E206619	LONG LAKE	125.47	49.915	2018-08-02	36.9	3.97
Vancouver Island	E206619	LONG LAKE	125.47	49.915	2016-08-30 12:00:00	35.7	3.99
Vancouver Island	E206619	LONG LAKE	125.47	49.915	2018-08-16	35.7	4.01
Vancouver Island	E206619	LONG LAKE	125.47	49.915	2017-11-08	29.5	4.02
Vancouver Island	E206619	LONG LAKE	125.47	49.915	2015-04-21 13:16:00	33.4	4.02
Vancouver Island	E206619	LONG LAKE	125.47	49.915	2018-08-02	39	4.06
Vancouver Island	E206619	LONG LAKE	125.47	49.915	2017-11-02	32.9	4.08
Vancouver Island	E206619	LONG LAKE	125.47	49.915	2014-04-22 13:16:00	39.4	4.09
Vancouver Island	E206619	LONG LAKE	125.47	49.915	2015-04-21 13:17:00	38.4	4.1
Vancouver Island	E206619	LONG LAKE	125.47	49.915	2014-04-15 13:16:00	39.1	4.1
Vancouver Island	E206619	LONG LAKE	125.47	49.915	2017-11-02	31.1	4.14
Vancouver Island	E206619	LONG LAKE	125.47	49.915	2014-04-15 13:21:00	38.4	4.14
Vancouver Island	E206619	LONG LAKE	125.47	49.915	2014-07-29 13:17:00	37.9	4.15
Vancouver Island	E206619	LONG LAKE	125.47	49.915	2017-11-08	31.2	4.16
Vancouver Island	E206619	LONG LAKE	125.47	49.915	2018-08-09	35.7	4.17
Vancouver Island	E206619	LONG LAKE	125.47	49.915	2014-11-12 13:18:00	39.9	4.18
Vancouver Island	E206619	LONG LAKE	125.47	49.915	2018-08-16	36.1	4.19
Vancouver Island	E206619	LONG LAKE	125.47	49.915	2015-05-20 13:18:00	38.5	4.19
Vancouver Island	E206619	LONG LAKE	125.47	49.915	2013-10-22 12:02:00	40.1	4.2
Vancouver Island	E206619	LONG LAKE	125.47	49.915	2018-08-23	36.7	4.21
Vancouver Island	E206619	LONG LAKE	125.47	49.915	2017-11-16	32.7	4.24
Vancouver Island	E206619	LONG LAKE	125.47	49.915	2014-10-22 13:19:00	30.5	4.25
Vancouver Island	E206619	LONG LAKE	125.47	49.915	2013-11-08 15:02:00	39.9	4.26
Vancouver Island	E206619	LONG LAKE	125.47	49.915	2014-08-19 13:17:00	42.4	4.26
Vancouver Island	E206619	LONG LAKE	125.47	49.915	2013-08-07 10:19:00	45.1	4.26
Vancouver Island	E206619	LONG LAKE	125.47	49.915	2015-11-02 00:02:00	33.8	4.27
Vancouver Island	E206619	LONG LAKE	125.47	49.915	2014-10-29 13:17:00	36.4	4.27
Vancouver Island	E206619	LONG LAKE	125.47	49.915	2013-10-22 12:03:00	39.8	4.27
Vancouver Island	E206619	LONG LAKE	125.47	49.915	2013-08-16 10:18:00	39.5	4.28
Vancouver Island	E206619	LONG LAKE	125.47	49.915	2018-08-23	37.1	4.29
Vancouver Island	E206619	LONG LAKE	125.47	49.915	2015-08-05 00:03:00	41.3	4.3
Vancouver Island	E206619	LONG LAKE	125.47	49.915	2015-04-29 13:17:00	38.3	4.31
Vancouver Island	E206619	LONG LAKE	125.47	49.915	2014-07-22 13:17:00	43.2	4.32
Vancouver Island	E206619	LONG LAKE	125.47	49.915	2015-04-21 13:18:00	37.7	4.35
Vancouver Island	E206619	LONG LAKE	125.47	49.915	2013-10-09 09:49:00	42.8	4.35
Vancouver Island	E206619	LONG LAKE	125.47	49.915	2014-11-04 13:18:00	43	4.35
Vancouver Island	E206619	LONG LAKE	125.47	49.915	2015-08-18 00:02:00	39.3	4.36
Vancouver Island	E206619	LONG LAKE	125.47	49.915	2013-10-29 10:19:00	42.8	4.36
Vancouver Island	E206619	LONG LAKE	125.47	49.915	2013-08-07 10:18:00	43.9	4.38
Vancouver Island	E206619	LONG LAKE	125.47	49.915	2013-05-01 00:18:00	43.1	4.39
Vancouver Island	E206619	LONG LAKE	125.47	49.915	2014-08-19 13:18:00	41.8	4.4
Vancouver Island	E206619	LONG LAKE	125.47	49.915	2015-10-13 00:03:00	43.3	4.41
Vancouver Island	E206619	LONG LAKE	125.47	49.915	2011-08-12 00:20:00	40.7	4.42
Vancouver Island	E206619	LONG LAKE	125.47	49.915	2013-08-16 10:19:00	45.5	4.42
Vancouver Island	E206619	LONG LAKE	125.47	49.915	2015-08-05 00:02:00	40	4.43
Vancouver Island	E206619	LONG LAKE	125.47	49.915	2017-10-25	33.4	4.45
Vancouver Island	E206619	LONG LAKE	125.47	49.915	2013-08-27 00:03:00	45.5	4.45
Vancouver Island	E206619	LONG LAKE	125.47	49.915	2014-04-15 13:18:00	42.8	4.46
Vancouver Island	E206619	LONG LAKE	125.47	49.915	2013-08-27 00:02:00	44.1	4.46
Vancouver Island	E206619	LONG LAKE	125.47	49.915	2015-08-05	37.3	4.47
Vancouver Island	E206619	LONG LAKE	125.47	49.915	2014-08-06 13:17:00	41.9	4.47
Vancouver Island	E206619	LONG LAKE	125.47	49.915	2015-08-11 00:03:00	41.6	4.48
Vancouver Island	E206619	LONG LAKE	125.47	49.915	2014-07-22 13:18:00	44.4	4.48
Vancouver Island	E206619	LONG LAKE	125.47	49.915	2015-04-29 13:18:00	39.3	4.49
Vancouver Island	E206619	LONG LAKE	125.47	49.915	2013-11-08 15:03:00	43.4	4.49
Vancouver Island	E206619	LONG LAKE	125.47	49.915	2018-08-09	38.4	4.5
Vancouver Island	E206619	LONG LAKE	125.47	49.915	2012-05-30 00:03:00	50.4	4.5
Vancouver Island	E206619	LONG LAKE	125.47	49.915	2013-10-16 00:03:00	43.7	4.51
Vancouver Island	E206619	LONG LAKE	125.47	49.915	2014-08-06 13:18:00	44.1	4.51
Vancouver Island	E206619	LONG LAKE	125.47	49.915	2015-08-26 00:03:00	40	4.52
Vancouver Island	E206619	LONG LAKE	125.47	49.915	2013-10-29 10:18:00	41.4	4.52
Vancouver Island	E206619	LONG LAKE	125.47	49.915	2014-04-22 13:21:00	43.5	4.52
Vancouver Island	E206619	LONG LAKE	125.47	49.915	2015-05-06 13:17:00	43.1	4.53
Vancouver Island	E206619	LONG LAKE	125.47	49.915	2014-04-22 13:18:00	44.5	4.53
Vancouver Island	E206619	LONG LAKE	125.47	49.915	2015-08-05 00:01:00	38	4.54
Vancouver Island	E206619	LONG LAKE	125.47	49.915	2015-08-18 00:04:00	39.2	4.54
Vancouver Island	E206619	LONG LAKE	125.47	49.915	2014-08-12 13:18:00	42.4	4.55
Vancouver Island	E206619	LONG LAKE	125.47	49.915	2014-07-29 13:18:00	43	4.56
Vancouver Island	E206619	LONG LAKE	125.47	49.915	2013-10-16 00:02:00	41.6	4.57
Vancouver Island	E206619	LONG LAKE	125.47	49.915	2014-10-22 13:18:00	41.3	4.59
Vancouver Island	E206619	LONG LAKE	125.47	49.915	2014-04-15 13:17:00	42	4.59
Vancouver Island	E206619	LONG LAKE	125.47	49.915	2014-05-06 13:18:00	39.4	4.6
Vancouver Island	E206619	LONG LAKE	125.47	49.915	2013-05-01 00:19:00	44.1	4.6
Vancouver Island	E206619	LONG LAKE	125.47	49.915	2015-08-26 00:02:00	38.4	4.61
Vancouver Island	E206619	LONG LAKE	125.47	49.915	2014-04-29 13:17:00	42	4.61
Vancouver Island	E206619	LONG LAKE	125.47	49.915	2016-04-20 13:16:00	40.4	4.62
Vancouver Island	E206619	LONG LAKE	125.47	49.915	2015-05-06 13:18:00	43.6	4.62
Vancouver Island	E206619	LONG LAKE	125.47	49.915	2014-04-22 13:17:00	45.2	4.62
Vancouver Island	E206619	LONG LAKE	125.47	49.915	2013-08-21 10:30:00	46.6	4.62
Vancouver Island	E206619	LONG LAKE	125.47	49.915	2016-10-27 13:15:00	34.4	4.63
Vancouver Island	E206619	LONG LAKE	125.47	49.915	2015-08-26 00:04:00	38	4.65
Vancouver Island	E206619	LONG LAKE	125.47	49.915	2014-10-22 13:17:00	41.5	4.65
Vancouver Island	E206619	LONG LAKE	125.47	49.915	2013-08-21 10:25:00	44.9	4.65
Vancouver Island	E206619	LONG LAKE	125.47	49.915	2013-10-09 09:50:00	43	4.66
Vancouver Island	E206619	LONG LAKE	125.47	49.915	2015-08-11 00:01:00	39.4	4.67
Vancouver Island	E206619	LONG LAKE	125.47	49.915	2015-08-11 00:04:00	39.8	4.68
Vancouver Island	E206619	LONG LAKE	125.47	49.915	2014-11-17 13:18:00	42.4	4.68
Vancouver Island	E206619	LONG LAKE	125.47	49.915	2016-11-09 12:00:00	40.7	4.69
Vancouver Island	E206619	LONG LAKE	125.47	49.915	2015-10-13 00:02:00	44.9	4.7
Vancouver Island	E206619	LONG LAKE	125.47	49.915	2014-05-06 13:17:00	39.7	4.71
Vancouver Island	E206619	LONG LAKE	125.47	49.915	2012-08-23 11:02:00	47.9	4.72
Vancouver Island	E206619	LONG LAKE	125.47	49.915	2015-08-26 00:01:00	37.5	4.73
Vancouver Island	E206619	LONG LAKE	125.47	49.915	2016-11-22 12:00:00	36.7	4.74
Vancouver Island	E206619	LONG LAKE	125.47	49.915	2015-08-26	38.6	4.74
Vancouver Island	E206619	LONG LAKE	125.47	49.915	2015-05-13 13:18:00	41.1	4.74
Vancouver Island	E206619	LONG LAKE	125.47	49.915	2016-05-11 13:15:00	41.2	4.74
Vancouver Island	E206619	LONG LAKE	125.47	49.915	2012-05-30 00:02:00	48.8	4.75
Vancouver Island	E206619	LONG LAKE	125.47	49.915	2012-08-23 11:03:00	48.3	4.77
Vancouver Island	E206619	LONG LAKE	125.47	49.915	2015-05-13 13:17:00	41.7	4.79
Vancouver Island	E206619	LONG LAKE	125.47	49.915	2014-04-29 13:18:00	43.3	4.8
Vancouver Island	E206619	LONG LAKE	125.47	49.915	2015-08-18 00:03:00	41.7	4.84
Vancouver Island	E206619	LONG LAKE	125.47	49.915	2015-11-02 00:03:00	42.8	4.85
Vancouver Island	E206619	LONG LAKE	125.47	49.915	2016-04-28 00:01:00	43.1	4.85
Vancouver Island	E206619	LONG LAKE	125.47	49.915	2014-10-29 13:18:00	45.4	4.85
Vancouver Island	E206619	LONG LAKE	125.47	49.915	2014-08-12 13:17:00	42.9	4.87
Vancouver Island	E206619	LONG LAKE	125.47	49.915	2012-07-24 11:03:00	46	4.88
Vancouver Island	E206619	LONG LAKE	125.47	49.915	2016-05-04 13:15:00	42.6	4.9
Vancouver Island	E206619	LONG LAKE	125.47	49.915	2015-08-11 00:02:00	47	4.94
Vancouver Island	E206619	LONG LAKE	125.47	49.915	2017-08-29	37.3	4.95
Vancouver Island	E206619	LONG LAKE	125.47	49.915	2015-08-11	41.1	4.95
Vancouver Island	E206619	LONG LAKE	125.47	49.915	2017-08-29	38.6	4.96
Vancouver Island	E206619	LONG LAKE	125.47	49.915	2012-07-24 11:02:00	45.6	4.96
Vancouver Island	E206619	LONG LAKE	125.47	49.915	2015-08-18	38.8	4.98
Vancouver Island	E206619	LONG LAKE	125.47	49.915	2015-08-18 00:01:00	40.9	4.98
Vancouver Island	E206619	LONG LAKE	125.47	49.915	2016-04-13 13:16:00	41.7	4.99
Vancouver Island	E206619	LONG LAKE	125.47	49.915	2015-10-13 00:01:00	42	4.99
Vancouver Island	E206619	LONG LAKE	125.47	49.915	2017-08-29	43.5	4.99
Vancouver Island	E206619	LONG LAKE	125.47	49.915	2018-08-16	49.2	5
Vancouver Island	E206619	LONG LAKE	125.47	49.915	2015-10-13	43.7	5.01
Vancouver Island	E206619	LONG LAKE	125.47	49.915	2016-05-11 13:15:00	43.7	5.02
Vancouver Island	E206619	LONG LAKE	125.47	49.915	2017-08-29	44.9	5.07
Vancouver Island	E206619	LONG LAKE	125.47	49.915	2017-10-25	45.4	5.08
Vancouver Island	E206619	LONG LAKE	125.47	49.915	2015-10-13 00:04:00	41.9	5.1
Vancouver Island	E206619	LONG LAKE	125.47	49.915	2016-08-09 13:15:00	37.3	5.12
Vancouver Island	E206619	LONG LAKE	125.47	49.915	2018-08-16	48.7	5.13
Vancouver Island	E206619	LONG LAKE	125.47	49.915	2017-08-15	40.9	5.14
Vancouver Island	E206619	LONG LAKE	125.47	49.915	2017-05-10 13:15:00	42.8	5.15
Vancouver Island	E206619	LONG LAKE	125.47	49.915	2017-11-02	43.2	5.19
Vancouver Island	E206619	LONG LAKE	125.47	49.915	2018-08-23	47.9	5.21
Vancouver Island	E206619	LONG LAKE	125.47	49.915	2018-08-09	48.6	5.21
Vancouver Island	E206619	LONG LAKE	125.47	49.915	2018-08-02	53	5.24
Vancouver Island	E206619	LONG LAKE	125.47	49.915	2017-08-15	38.9	5.25
Vancouver Island	E206619	LONG LAKE	125.47	49.915	2018-08-02	53	5.25
Vancouver Island	E206619	LONG LAKE	125.47	49.915	2016-05-11 13:16:00	43.8	5.26
Vancouver Island	E206619	LONG LAKE	125.47	49.915	2016-11-03 13:15:00	44.4	5.28
Vancouver Island	E206619	LONG LAKE	125.47	49.915	2018-08-23	48.3	5.29
Vancouver Island	E206619	LONG LAKE	125.47	49.915	2016-04-20 13:17:00	45.8	5.31
Vancouver Island	E206619	LONG LAKE	125.47	49.915	2016-04-28 00:03:00	45.9	5.31
Vancouver Island	E206619	LONG LAKE	125.47	49.915	2016-08-09 13:15:00	41	5.32
Vancouver Island	E206619	LONG LAKE	125.47	49.915	2016-08-30 12:00:00	48.2	5.32
Vancouver Island	E206619	LONG LAKE	125.47	49.915	2017-04-27 12:00:00	46.5	5.33
Vancouver Island	E206619	LONG LAKE	125.47	49.915	2016-08-17 12:00:00	44.7	5.34
Vancouver Island	E206619	LONG LAKE	125.47	49.915	2017-05-10 13:15:00	46.1	5.34
Vancouver Island	E206619	LONG LAKE	125.47	49.915	2018-08-09	49.3	5.34
Vancouver Island	E206619	LONG LAKE	125.47	49.915	2016-04-28 00:02:00	45.6	5.35
Vancouver Island	E206619	LONG LAKE	125.47	49.915	2016-08-17 12:00:00	45.7	5.35
Vancouver Island	E206619	LONG LAKE	125.47	49.915	2017-08-15	45.8	5.36
Vancouver Island	E206619	LONG LAKE	125.47	49.915	2016-08-30 12:00:00	48.2	5.36
Vancouver Island	E206619	LONG LAKE	125.47	49.915	2017-11-02	46.4	5.37
Vancouver Island	E206619	LONG LAKE	125.47	49.915	2011-08-12 00:30:00	51.1	5.39
Vancouver Island	E206619	LONG LAKE	125.47	49.915	2016-04-20 13:18:00	45.3	5.4
Vancouver Island	E206619	LONG LAKE	125.47	49.915	2011-08-12	48.7	5.44
Vancouver Island	E206619	LONG LAKE	125.47	49.915	2017-11-08	45.4	5.45
Vancouver Island	E206619	LONG LAKE	125.47	49.915	2017-04-27 12:00:00	47.3	5.45
Vancouver Island	E206619	LONG LAKE	125.47	49.915	2017-10-19	45.6	5.46
Vancouver Island	E206619	LONG LAKE	125.47	49.915	2017-11-16	49	5.46
Vancouver Island	E206619	LONG LAKE	125.47	49.915	2017-10-25	44.1	5.47
Vancouver Island	E206619	LONG LAKE	125.47	49.915	2016-05-04 13:15:00	45.9	5.49
Vancouver Island	E206619	LONG LAKE	125.47	49.915	2016-11-22 12:00:00	42.5	5.52
Vancouver Island	E206619	LONG LAKE	125.47	49.915	2016-04-13 13:17:00	45.1	5.53
Vancouver Island	E206619	LONG LAKE	125.47	49.915	2017-08-15	46.2	5.61
Vancouver Island	E206619	LONG LAKE	125.47	49.915	2016-08-25 12:00:00	47.7	5.62
Vancouver Island	E206619	LONG LAKE	125.47	49.915	2016-08-25 12:00:00	45.4	5.65
Vancouver Island	E206619	LONG LAKE	125.47	49.915	2016-05-04 13:16:00	47.3	5.65
Vancouver Island	E206619	LONG LAKE	125.47	49.915	2016-04-13 13:18:00	45.3	5.72
Vancouver Island	E206619	LONG LAKE	125.47	49.915	2017-10-19	43	5.75
Vancouver Island	E206619	LONG LAKE	125.47	49.915	2017-10-19	42.9	5.98
Vancouver Island	E206619	LONG LAKE	125.47	49.915	2017-10-19	46.5	5.99
Vancouver Island	E206718	O`CONNOR LAKE	127.248	50.5406	1996-08-22 19:00:00	1.8	0.7
Vancouver Island	E206720	BEAVER LAKE	127.315	50.6008	1996-08-24 08:00:00	1.8	0.7
Vancouver Island	E206722	MAGGIE LAKE	125.434	49.0055	2002-04-02 16:00:00	3.33	0.46
Vancouver Island	E206722	MAGGIE LAKE	125.434	49.0055	1996-08-03 10:00:00	4.4	0.6
Vancouver Island	E206723	LAWSON LAKE	125.576	50.036	1996-08-17 17:30:00	3.8	1
Vancouver Island	E207156	MCIVOR LAKE	125.369	50.0103	2010-08-19 11:50:00	7.16	0.79
Vancouver Island	E207156	MCIVOR LAKE	125.369	50.0103	2010-08-19 12:00:00	7.02	0.83
Vancouver Island	E207156	MCIVOR LAKE	125.369	50.0103	2011-03-16 14:16:00	7.82	0.83
Vancouver Island	E207156	MCIVOR LAKE	125.369	50.0103	2010-05-24 12:45:00	6.96	0.85
Vancouver Island	E207156	MCIVOR LAKE	125.369	50.0103	2010-11-24 13:05:00	7.69	0.85
Vancouver Island	E207156	MCIVOR LAKE	125.369	50.0103	2010-05-24 13:00:00	7.02	0.86
Vancouver Island	E207156	MCIVOR LAKE	125.369	50.0103	2010-05-24 12:50:00	7.08	0.86
Vancouver Island	E207156	MCIVOR LAKE	125.369	50.0103	2010-11-24 13:10:00	7.28	0.86
Vancouver Island	E207156	MCIVOR LAKE	125.369	50.0103	2010-11-24 13:00:00	7.45	0.87
Vancouver Island	E207156	MCIVOR LAKE	125.369	50.0103	2010-08-19 11:57:00	7.46	0.87
Vancouver Island	E207156	MCIVOR LAKE	125.369	50.0103	2011-03-16 14:16:00	8.29	0.87
Vancouver Island	E207156	MCIVOR LAKE	125.369	50.0103	2011-03-16 14:16:00	8.58	0.88
Vancouver Island	E207160	ROBERTS LAKE	125.541	50.2222	1996-08-20 10:00:00	3.6	0.7
Vancouver Island	E207429	OYSTER RIVER AT BRIDGE D/S OF ADRIAN CREEK	125.421	49.8025	1988-06-22 08:10:00	3.1	0.48
Vancouver Island	E207429	OYSTER RIVER AT BRIDGE D/S OF ADRIAN CREEK	125.421	49.8025	1988-07-13 13:40:00	3.56	0.61
Vancouver Island	E207429	OYSTER RIVER AT BRIDGE D/S OF ADRIAN CREEK	125.421	49.8025	1988-06-15 08:05:00	3.6	0.67
Vancouver Island	E207429	OYSTER RIVER AT BRIDGE D/S OF ADRIAN CREEK	125.421	49.8025	1988-08-09 12:50:00	4.89	0.96
Vancouver Island	E207430	LITTLE OYSTER RIVER AT YORK RD	125.206	49.8964	1989-03-22 14:50:00	3.45	1.14
Vancouver Island	E207430	LITTLE OYSTER RIVER AT YORK RD	125.206	49.8964	1988-12-13 14:05:00	3.46	1.16
Vancouver Island	E207430	LITTLE OYSTER RIVER AT YORK RD	125.206	49.8964	1988-11-22 10:20:00	3.53	1.26
Vancouver Island	E207430	LITTLE OYSTER RIVER AT YORK RD	125.206	49.8964	1989-01-23 13:40:00	3.84	1.29
Vancouver Island	E207430	LITTLE OYSTER RIVER AT YORK RD	125.206	49.8964	2008-11-11 11:25:00	4.36	1.46
Vancouver Island	E207430	LITTLE OYSTER RIVER AT YORK RD	125.206	49.8964	1988-04-13 10:45:00	4.42	1.47
Vancouver Island	E207430	LITTLE OYSTER RIVER AT YORK RD	125.206	49.8964	1989-11-13 12:10:00	5.06	1.51
Vancouver Island	E207430	LITTLE OYSTER RIVER AT YORK RD	125.206	49.8964	1989-11-06 12:10:00	5.78	1.75
Vancouver Island	E207430	LITTLE OYSTER RIVER AT YORK RD	125.206	49.8964	1988-05-18 08:55:00	6.73	2.21
Vancouver Island	E207430	LITTLE OYSTER RIVER AT YORK RD	125.206	49.8964	1988-06-07 14:20:00	7.24	2.29
Vancouver Island	E207430	LITTLE OYSTER RIVER AT YORK RD	125.206	49.8964	1989-10-23 12:45:00	7.97	2.32
Vancouver Island	E207430	LITTLE OYSTER RIVER AT YORK RD	125.206	49.8964	1989-05-29 12:05:00	7.27	2.34
Vancouver Island	E207430	LITTLE OYSTER RIVER AT YORK RD	125.206	49.8964	1989-05-23 12:10:00	7.06	2.35
Vancouver Island	E207430	LITTLE OYSTER RIVER AT YORK RD	125.206	49.8964	2008-11-02 10:05:00	7.32	2.37
Vancouver Island	E207430	LITTLE OYSTER RIVER AT YORK RD	125.206	49.8964	1989-10-30 11:50:00	7.4	2.39
Vancouver Island	E207430	LITTLE OYSTER RIVER AT YORK RD	125.206	49.8964	1989-05-15 11:45:00	7.64	2.4
Vancouver Island	E207430	LITTLE OYSTER RIVER AT YORK RD	125.206	49.8964	1988-06-13 15:35:00	7.98	2.44
Vancouver Island	E207430	LITTLE OYSTER RIVER AT YORK RD	125.206	49.8964	2008-10-26 11:00:00	7.96	2.45
Vancouver Island	E207430	LITTLE OYSTER RIVER AT YORK RD	125.206	49.8964	2008-10-14 10:40:00	8.05	2.49
Vancouver Island	E207430	LITTLE OYSTER RIVER AT YORK RD	125.206	49.8964	1988-05-31 10:15:00	7.76	2.55
Vancouver Island	E207430	LITTLE OYSTER RIVER AT YORK RD	125.206	49.8964	2008-10-19 11:50:00	8.05	2.55
Vancouver Island	E207430	LITTLE OYSTER RIVER AT YORK RD	125.206	49.8964	1989-06-05 11:30:00	8.17	2.7
Vancouver Island	E207430	LITTLE OYSTER RIVER AT YORK RD	125.206	49.8964	1988-11-02 13:30:00	8.32	2.76
Vancouver Island	E207430	LITTLE OYSTER RIVER AT YORK RD	125.206	49.8964	1988-06-21 16:10:00	9.41	2.87
Vancouver Island	E207430	LITTLE OYSTER RIVER AT YORK RD	125.206	49.8964	1988-07-13 14:20:00	10	3.29
Vancouver Island	E207430	LITTLE OYSTER RIVER AT YORK RD	125.206	49.8964	1989-10-16 13:45:00	10.9	3.51
Vancouver Island	E207430	LITTLE OYSTER RIVER AT YORK RD	125.206	49.8964	1988-10-05 13:15:00	10.8	3.73
Vancouver Island	E207430	LITTLE OYSTER RIVER AT YORK RD	125.206	49.8964	2008-08-10 11:50:00	11.5	3.76
Vancouver Island	E207430	LITTLE OYSTER RIVER AT YORK RD	125.206	49.8964	2008-08-17 11:00:00	11.6	3.77
Vancouver Island	E207430	LITTLE OYSTER RIVER AT YORK RD	125.206	49.8964	2008-09-07 12:50:00	10.9	3.78
Vancouver Island	E207430	LITTLE OYSTER RIVER AT YORK RD	125.206	49.8964	2008-08-24 11:30:00	11.6	3.8
Vancouver Island	E207430	LITTLE OYSTER RIVER AT YORK RD	125.206	49.8964	2008-09-01 10:25:00	11.1	3.84
Vancouver Island	E207431	WOODHUS CREEK AT DUNCAN MAIN	125.29	49.8842	1988-12-13 14:15:00	3.4	0.91
Vancouver Island	E207431	WOODHUS CREEK AT DUNCAN MAIN	125.29	49.8842	1988-11-22 10:10:00	3.59	0.97
Vancouver Island	E207431	WOODHUS CREEK AT DUNCAN MAIN	125.29	49.8842	1989-03-22 14:35:00	3.71	0.99
Vancouver Island	E207431	WOODHUS CREEK AT DUNCAN MAIN	125.29	49.8842	1989-02-23 11:35:00	3.59	1.02
Vancouver Island	E207431	WOODHUS CREEK AT DUNCAN MAIN	125.29	49.8842	1988-04-13 11:05:00	3.9	1.05
Vancouver Island	E207431	WOODHUS CREEK AT DUNCAN MAIN	125.29	49.8842	1989-01-23 13:30:00	3.86	1.06
Vancouver Island	E207431	WOODHUS CREEK AT DUNCAN MAIN	125.29	49.8842	1989-11-13 11:40:00	4.19	1.07
Vancouver Island	E207431	WOODHUS CREEK AT DUNCAN MAIN	125.29	49.8842	1989-11-06 11:45:00	4.59	1.16
Vancouver Island	E207431	WOODHUS CREEK AT DUNCAN MAIN	125.29	49.8842	1989-05-29 11:35:00	4.47	1.19
Vancouver Island	E207431	WOODHUS CREEK AT DUNCAN MAIN	125.29	49.8842	2008-11-02 11:30:00	4.6	1.19
Vancouver Island	E207431	WOODHUS CREEK AT DUNCAN MAIN	125.29	49.8842	1988-05-18 09:10:00	4.48	1.23
Vancouver Island	E207431	WOODHUS CREEK AT DUNCAN MAIN	125.29	49.8842	1989-10-30 11:20:00	5.03	1.29
Vancouver Island	E207431	WOODHUS CREEK AT DUNCAN MAIN	125.29	49.8842	1989-05-15 11:10:00	5.09	1.31
Vancouver Island	E207431	WOODHUS CREEK AT DUNCAN MAIN	125.29	49.8842	1989-10-23 12:00:00	5.56	1.35
Vancouver Island	E207431	WOODHUS CREEK AT DUNCAN MAIN	125.29	49.8842	1988-11-02 13:15:00	6.36	1.35
Vancouver Island	E207431	WOODHUS CREEK AT DUNCAN MAIN	125.29	49.8842	1989-05-23 11:40:00	4.83	1.36
Vancouver Island	E207431	WOODHUS CREEK AT DUNCAN MAIN	125.29	49.8842	1988-06-07 14:10:00	5.19	1.38
Vancouver Island	E207431	WOODHUS CREEK AT DUNCAN MAIN	125.29	49.8842	1988-05-31 10:30:00	5.01	1.4
Vancouver Island	E207431	WOODHUS CREEK AT DUNCAN MAIN	125.29	49.8842	1988-06-13 15:20:00	5.33	1.4
Vancouver Island	E207431	WOODHUS CREEK AT DUNCAN MAIN	125.29	49.8842	2008-10-19 13:50:00	5.36	1.4
Vancouver Island	E207431	WOODHUS CREEK AT DUNCAN MAIN	125.29	49.8842	1989-06-05 11:00:00	5.49	1.5
Vancouver Island	E207431	WOODHUS CREEK AT DUNCAN MAIN	125.29	49.8842	2008-10-26 12:15:00	5.88	1.59
Vancouver Island	E207431	WOODHUS CREEK AT DUNCAN MAIN	125.29	49.8842	1988-06-21 16:00:00	6.45	1.69
Vancouver Island	E207431	WOODHUS CREEK AT DUNCAN MAIN	125.29	49.8842	2008-09-01 11:55:00	6.65	1.86
Vancouver Island	E207431	WOODHUS CREEK AT DUNCAN MAIN	125.29	49.8842	1988-07-13 13:15:00	6.84	1.9
Vancouver Island	E207431	WOODHUS CREEK AT DUNCAN MAIN	125.29	49.8842	1989-10-16 13:10:00	7.3	1.98
Vancouver Island	E207431	WOODHUS CREEK AT DUNCAN MAIN	125.29	49.8842	2008-08-24 13:40:00	7.53	2.13
Vancouver Island	E207431	WOODHUS CREEK AT DUNCAN MAIN	125.29	49.8842	2008-09-07 14:10:00	7.5	2.14
Vancouver Island	E207431	WOODHUS CREEK AT DUNCAN MAIN	125.29	49.8842	2008-08-10 13:25:00	7.48	2.17
Vancouver Island	E207431	WOODHUS CREEK AT DUNCAN MAIN	125.29	49.8842	2008-08-17 12:50:00	7.8	2.18
Vancouver Island	E207431	WOODHUS CREEK AT DUNCAN MAIN	125.29	49.8842	1988-10-05 13:00:00	8.79	2.62
Vancouver Island	E207431	WOODHUS CREEK AT DUNCAN MAIN	125.29	49.8842	1988-08-09 12:20:00	9.44	2.7
Vancouver Island	E207466	QUAMICHAN LAKE, CENTRE	123.662	48.8003	2018-02-08 11:10:00	18.1	4.14
Vancouver Island	E207672	BIG TREE CREEK AT HIGHWAY	125.734	50.2531	1988-11-23 13:50:00	2.7	0.69
Vancouver Island	E207672	BIG TREE CREEK AT HIGHWAY	125.734	50.2531	1989-11-06 13:30:00	2.97	0.71
Vancouver Island	E207672	BIG TREE CREEK AT HIGHWAY	125.734	50.2531	1989-01-24 13:45:00	3.26	0.82
Vancouver Island	E207673	STOWE CREEK AT HIGHWAY	125.884	50.2992	1988-11-23 13:35:00	2.29	0.69
Vancouver Island	E207673	STOWE CREEK AT HIGHWAY	125.884	50.2992	1989-11-07 14:15:00	2.62	0.71
Vancouver Island	E207673	STOWE CREEK AT HIGHWAY	125.884	50.2992	1989-01-24 08:30:00	2.47	0.76
Vancouver Island	E207674	ROBERTS CREEK AT HIGHWAY	125.553	50.2269	1989-11-06 13:15:00	3.9	0.72
Vancouver Island	E207674	ROBERTS CREEK AT HIGHWAY	125.553	50.2269	1989-01-24 14:00:00	3.71	0.75
Vancouver Island	E207674	ROBERTS CREEK AT HIGHWAY	125.553	50.2269	1988-11-23 14:15:00	3.88	0.75
Vancouver Island	E207674	ROBERTS CREEK AT HIGHWAY	125.553	50.2269	1989-02-06 11:15:00	4.03	0.76
Vancouver Island	E207675	EVE RIVER AT HIGHWAY	126.229	50.3169	1989-11-06 14:40:00	3.08	0.52
Vancouver Island	E207675	EVE RIVER AT HIGHWAY	126.229	50.3169	1988-11-23 13:15:00	3.33	0.61
Vancouver Island	E207675	EVE RIVER AT HIGHWAY	126.229	50.3169	1989-01-24 09:00:00	4.18	0.75
Vancouver Island	E207676	TSITIKA RIVER AT HIGHWAY	126.437	50.2435	1999-12-14 11:50:00	1.4	0.27
Vancouver Island	E207676	TSITIKA RIVER AT HIGHWAY	126.437	50.2435	1989-11-06 14:35:00	1.68	0.28
Vancouver Island	E207676	TSITIKA RIVER AT HIGHWAY	126.437	50.2435	1988-11-23 12:50:00	1.7	0.32
Vancouver Island	E207676	TSITIKA RIVER AT HIGHWAY	126.437	50.2435	1989-01-24 09:20:00	1.98	0.35
Vancouver Island	E207676	TSITIKA RIVER AT HIGHWAY	126.437	50.2435	2001-11-07 10:10:00	1.7	0.41003
Vancouver Island	E207677	KOKISH RIVER JUST UPSTREAM OF IBEC	126.877	50.5208	1989-02-06 16:05:00	8.29	0.47
Vancouver Island	E207677	KOKISH RIVER JUST UPSTREAM OF IBEC	126.877	50.5208	1989-01-24 11:55:00	8.84	0.47
Vancouver Island	E207677	KOKISH RIVER JUST UPSTREAM OF IBEC	126.877	50.5208	1988-11-23 10:00:00	8.86	0.51
Vancouver Island	E207677	KOKISH RIVER JUST UPSTREAM OF IBEC	126.877	50.5208	1989-11-07 11:55:00	2.9	0.58
Vancouver Island	E207678	STEELE CREEK AT HIGHWAY	126.819	50.2742	1989-01-24 10:00:00	2.83	0.36
Vancouver Island	E207678	STEELE CREEK AT HIGHWAY	126.819	50.2742	1988-11-23 12:15:00	2.72	0.39
Vancouver Island	E207678	STEELE CREEK AT HIGHWAY	126.819	50.2742	1989-11-07 12:35:00	3.46	0.41
Vancouver Island	E207679	CLUXEWE RIVER AT HIGHWAY	127.145	50.5507	1988-11-23 09:00:00	3.4	0.79
Vancouver Island	E207679	CLUXEWE RIVER AT HIGHWAY	127.145	50.5507	1989-11-06 15:40:00	4.46	0.96
Vancouver Island	E207679	CLUXEWE RIVER AT HIGHWAY	127.145	50.5507	1989-01-24 11:30:00	5.1	1.13
Vancouver Island	E207680	KEOGH RIVER AT HIGHWAY	127.302	50.6033	1988-11-23 08:30:00	2.02	0.69
Vancouver Island	E207680	KEOGH RIVER AT HIGHWAY	127.302	50.6033	1989-01-24 10:40:00	2.09	0.72
Vancouver Island	E207680	KEOGH RIVER AT HIGHWAY	127.302	50.6033	1989-11-07 11:10:00	2.48	0.78
Vancouver Island	E207792	GOLD RIVER AT HIGHWAY	126.055	49.7758	1989-08-15 14:30:00	5.15	0.57
Vancouver Island	E207792	GOLD RIVER AT HIGHWAY	126.055	49.7758	1989-08-21 13:45:00	4.87	0.58
Vancouver Island	E207792	GOLD RIVER AT HIGHWAY	126.055	49.7758	1989-09-12 12:30:00	5.53	0.7
Vancouver Island	E207793	HEBER RIVER JUST UPSTREAM OF GOLD RIVER	126.051	49.7742	1989-08-21 13:00:00	7.8	0.83
Vancouver Island	E207793	HEBER RIVER JUST UPSTREAM OF GOLD RIVER	126.051	49.7742	1989-08-15 12:00:00	7.1	0.88
Vancouver Island	E207793	HEBER RIVER JUST UPSTREAM OF GOLD RIVER	126.051	49.7742	1989-09-12 11:05:00	8.1	0.96
Vancouver Island	E216693	QUATSE LAKE	127.564	50.6317	2018-03-20 09:27:00	1.59	0.503
Vancouver Island	E217377	MEGIN LAKE	126.074	49.4909	1996-08-08 09:30:00	6	0.5
Vancouver Island	E217507	COWICHAN LAKE LIMNOLOGY STATION # 1	124.171	48.8258	2018-03-12 14:00:00	7.49	0.599
Vancouver Island	E217507	COWICHAN LAKE LIMNOLOGY STATION # 1	124.171	48.8258	2014-02-12 11:15:00	7.77	0.614
Vancouver Island	E217507	COWICHAN LAKE LIMNOLOGY STATION # 1	124.171	48.8258	2014-02-12 11:20:00	7.69	0.635
Vancouver Island	E217507	COWICHAN LAKE LIMNOLOGY STATION # 1	124.171	48.8258	2014-02-12 11:25:00	7.7	0.643
Vancouver Island	E217508	COWICHAN LAKE LIMNOLOGY STATION # 2	124.157	48.8564	2014-02-12 10:30:00	7.6	0.597
Vancouver Island	E217508	COWICHAN LAKE LIMNOLOGY STATION # 2	124.157	48.8564	2014-02-12 10:40:00	7.73	0.603
Vancouver Island	E217508	COWICHAN LAKE LIMNOLOGY STATION # 2	124.157	48.8564	2018-03-12 13:00:00	7.7	0.614
Vancouver Island	E217508	COWICHAN LAKE LIMNOLOGY STATION # 2	124.157	48.8564	2014-02-12 10:35:00	7.42	0.641
Vancouver Island	E217509	COWICHAN LAKE LIMNOLOGY STATION # 3	124.281	48.8817	2014-02-12 10:10:00	7.51	0.576
Vancouver Island	E217509	COWICHAN LAKE LIMNOLOGY STATION # 3	124.281	48.8817	2018-03-12 12:00:00	7.38	0.588
Vancouver Island	E217509	COWICHAN LAKE LIMNOLOGY STATION # 3	124.281	48.8817	2014-02-12 10:05:00	7.62	0.596
Vancouver Island	E217509	COWICHAN LAKE LIMNOLOGY STATION # 3	124.281	48.8817	2014-02-12 10:00:00	7.65	0.604
Vancouver Island	E217835	ANGORA LAKE	125.533	49.0908	1996-08-08 10:30:00	5.3	0.9
Vancouver Island	E218573	FAREWELL LAKE (CAMPBELL RIVER)	125.588	50.2	1996-08-19 11:00:00	2.3	0.7
Vancouver Island	E220635	CAMERON RIVER	124.659	49.2908	2011-10-18 10:40:00	13.3	1.29
Vancouver Island	E220635	CAMERON RIVER	124.659	49.2908	2011-08-16 11:00:00	14.7	1.47
Vancouver Island	E223543	LITTLE TOQUART LAKE	125.365	49.064	1996-08-03 11:00:00	1.3	0.4
Vancouver Island	E223545	TOQUART LAKE	125.35	49.081	1996-08-03 12:00:00	3.7	0.4
Vancouver Island	E223546	BLACK LAKE ON WEST COAST	125.096	49.7714	1996-08-05 08:00:00	1.9	0.6
Vancouver Island	E223547	SUGSAW LAKE	125.082	48.852	1996-08-05 08:30:00	1.9	0.4
Vancouver Island	E223547	SUGSAW LAKE	125.082	48.852	2008-03-12 13:45:00	1.92	0.47
Vancouver Island	E223547	SUGSAW LAKE	125.082	48.852	2009-03-25 13:55:00	4.66454	0.47
Vancouver Island	E223547	SUGSAW LAKE	125.082	48.852	2008-08-26 11:00:00	2.02	0.49
Vancouver Island	E223547	SUGSAW LAKE	125.082	48.852	2009-03-25 13:50:00	4.78218	0.49
Vancouver Island	E223547	SUGSAW LAKE	125.082	48.852	2009-03-25 13:45:00	4.88218	0.49
Vancouver Island	E223547	SUGSAW LAKE	125.082	48.852	2008-03-12 13:47:00	1.95	0.5
Vancouver Island	E223547	SUGSAW LAKE	125.082	48.852	2008-03-12 13:40:00	1.91	0.51
Vancouver Island	E223547	SUGSAW LAKE	125.082	48.852	2008-05-15 12:40:00	2.02	0.51
Vancouver Island	E223547	SUGSAW LAKE	125.082	48.852	2008-05-15 12:40:00	2.06	0.51
Vancouver Island	E223547	SUGSAW LAKE	125.082	48.852	2008-05-15 12:40:00	2.07	0.52
Vancouver Island	E223547	SUGSAW LAKE	125.082	48.852	2008-05-15 12:40:00	2.09	0.52
Vancouver Island	E223547	SUGSAW LAKE	125.082	48.852	2008-08-26 10:40:00	2.13	0.53
Vancouver Island	E223547	SUGSAW LAKE	125.082	48.852	2008-10-28 14:30:00	2.19	0.54
Vancouver Island	E223547	SUGSAW LAKE	125.082	48.852	2008-05-15 12:40:00	2.27	0.54
Vancouver Island	E223547	SUGSAW LAKE	125.082	48.852	2008-10-28 14:25:00	2.27	0.54
Vancouver Island	E223547	SUGSAW LAKE	125.082	48.852	2008-10-28 14:26:00	2.44	0.55
Vancouver Island	E223547	SUGSAW LAKE	125.082	48.852	2008-05-15 12:40:00	2.06	0.56
Vancouver Island	E223547	SUGSAW LAKE	125.082	48.852	2008-10-28 14:20:00	2.55	0.57
Vancouver Island	E223547	SUGSAW LAKE	125.082	48.852	2008-08-26 10:20:00	2.54	0.59
Vancouver Island	E223548	PACHENA LAKE	125.027	48.837	1996-08-05 09:00:00	1.9	0.4
Vancouver Island	E223549	FREDERICK LAKE	125.025	48.853	1996-08-05 09:30:00	3.6	0.7
Vancouver Island	E223550	BLUE LAKE ON WEST COAST	124.906	48.734	1996-08-05 10:00:00	1.1	0.4
Vancouver Island	E223551	UCHUCK LAKE	125.106	49.037	1996-08-08 07:30:00	7.6	0.5
Vancouver Island	E223552	CATARACT LAKE	125.267	48.997	1996-08-08 08:30:00	11	1.2
Vancouver Island	E223553	NANAIMO - FIRST LAKE	124.167	49.094	1996-08-13 14:00:00	5.7	0.6
Vancouver Island	E223554	BEAVERTAIL LAKE	125.503	49.984	1996-08-16 17:30:00	3	0.8
Vancouver Island	E223555	ECHO LAKE NEAR CAMPBELL RIVER	125.41	49.9863	1996-08-16 19:00:00	4.6	1
Vancouver Island	E223556	CAMPBELL LAKE - LOVELAND BAY	125.445	50.044	1996-08-17 09:00:00	7.4	0.8
Vancouver Island	E223557	GOSLING LAKE	125.502	50.0582	1996-08-17 11:00:00	1.6	0.6
Vancouver Island	E223558	MERRILL LAKE	125.56	50.061	1996-08-17 13:30:00	2.3	0.7
Vancouver Island	E223559	BOOT LAKE	125.533	50.058	1996-08-17 15:30:00	2.3	0.6
Vancouver Island	E223560	MOHUN LAKE	125.494	50.125	1996-08-18 09:00:00	1.6	0.6
Vancouver Island	E223561	MORTON LAKE	125.478	50.124	1996-08-18 10:30:00	1.8	0.7
Vancouver Island	E223562	NO NAME LAKE	125.648	50.9696	1996-08-18 13:00:00	6.2	1
Vancouver Island	E223563	GRAY LAKE	125.597	50.0569	1996-08-18 14:30:00	3.7	0.7
Vancouver Island	E223564	MUSKEG LAKE	125.574	50.2	1996-08-19 13:00:00	1.9	0.7
Vancouver Island	E223565	UPPER QUINSAM LAKE 2	125.553	49.877	1996-08-19 20:00:00	6.9	0.8
Vancouver Island	E223566	CEDAR LAKE	125.564	50.204	1996-08-20 16:00:00	1.6	0.5
Vancouver Island	E223567	KATHLEEN LAKE	127.284	50.395	1996-08-21 16:30:00	10.7	1.1
Vancouver Island	E223568	SARA LAKE	127.41	50.5344	2002-03-14 16:00:00	2.17	0.87
Vancouver Island	E223568	SARA LAKE	127.41	50.5344	1996-08-21 19:00:00	2.8	1.1
Vancouver Island	E223676	IRON LAKE	127.211	50.367	1996-08-22 12:00:00	20.3	2
Vancouver Island	E223677	MAYNARD LAKE	127.211	50.4038	1996-08-22 14:00:00	9.7	1.6
Vancouver Island	E223678	THREE ISLE LAKE	127.216	50.4526	1996-08-22 15:30:00	4.8	1.3
Vancouver Island	E223679	KEOGH LAKE	127.175	50.4948	1996-08-22 17:00:00	2.2	0.7
Vancouver Island	E223680	ANUTZ LAKE	126.922	50.2998	1996-08-23 11:00:00	8.8	1
Vancouver Island	E223681	HUSTAN LAKE	127.262	50.6074	1996-08-23 13:30:00	6.8	0.9
Vancouver Island	E223682	ATLUCK LAKE	126.974	50.2047	1996-08-23 15:30:00	4.3	0.7
Vancouver Island	E223683	WOLFE LAKE	126.883	50.209	1996-08-23 17:30:00	12.2	1.4
Vancouver Island	E223684	MISTY LAKE	127.261	50.6	1996-08-24 09:30:00	2.2	0.8
Vancouver Island	E225798	IRON RIVER, IMMMEDIATELY UPSTREAM OF BLK 242 ADIT INFLUENCE	125.437	49.9203	2012-06-12 08:35:00	7.34	0.484
Vancouver Island	E225798	IRON RIVER, IMMMEDIATELY UPSTREAM OF BLK 242 ADIT INFLUENCE	125.437	49.9203	2012-05-29 08:35:00	8.99	0.544
Vancouver Island	E225798	IRON RIVER, IMMMEDIATELY UPSTREAM OF BLK 242 ADIT INFLUENCE	125.437	49.9203	2014-04-02	10.5	0.649
Vancouver Island	E225798	IRON RIVER, IMMMEDIATELY UPSTREAM OF BLK 242 ADIT INFLUENCE	125.437	49.9203	2014-04-03	8.31	0.689
Vancouver Island	E225798	IRON RIVER, IMMMEDIATELY UPSTREAM OF BLK 242 ADIT INFLUENCE	125.437	49.9203	2013-12-02	12.5	0.702
Vancouver Island	E225798	IRON RIVER, IMMMEDIATELY UPSTREAM OF BLK 242 ADIT INFLUENCE	125.437	49.9203	2013-11-04 10:00:00	10.4	0.755
Vancouver Island	E225798	IRON RIVER, IMMMEDIATELY UPSTREAM OF BLK 242 ADIT INFLUENCE	125.437	49.9203	2013-10-07	16.4	0.792
Vancouver Island	E225798	IRON RIVER, IMMMEDIATELY UPSTREAM OF BLK 242 ADIT INFLUENCE	125.437	49.9203	2013-10-15 09:00:00	17.1	0.931
Vancouver Island	E225798	IRON RIVER, IMMMEDIATELY UPSTREAM OF BLK 242 ADIT INFLUENCE	125.437	49.9203	2013-10-21 09:00:00	19.4	0.95
Vancouver Island	E225798	IRON RIVER, IMMMEDIATELY UPSTREAM OF BLK 242 ADIT INFLUENCE	125.437	49.9203	2013-10-28 09:00:00	22	1.02
Vancouver Island	E225798	IRON RIVER, IMMMEDIATELY UPSTREAM OF BLK 242 ADIT INFLUENCE	125.437	49.9203	2013-07-22	23.1	1.11
Vancouver Island	E225798	IRON RIVER, IMMMEDIATELY UPSTREAM OF BLK 242 ADIT INFLUENCE	125.437	49.9203	2014-07-23	26.8	1.22
Vancouver Island	E225798	IRON RIVER, IMMMEDIATELY UPSTREAM OF BLK 242 ADIT INFLUENCE	125.437	49.9203	2014-07-31	28.7	1.23
Vancouver Island	E225798	IRON RIVER, IMMMEDIATELY UPSTREAM OF BLK 242 ADIT INFLUENCE	125.437	49.9203	2013-07-29 00:06:00	26	1.27
Vancouver Island	E225798	IRON RIVER, IMMMEDIATELY UPSTREAM OF BLK 242 ADIT INFLUENCE	125.437	49.9203	2014-08-14	31	1.31
Vancouver Island	E225798	IRON RIVER, IMMMEDIATELY UPSTREAM OF BLK 242 ADIT INFLUENCE	125.437	49.9203	2014-08-20	31.2	1.44
Vancouver Island	E225798	IRON RIVER, IMMMEDIATELY UPSTREAM OF BLK 242 ADIT INFLUENCE	125.437	49.9203	2014-07-23 00:01:00	22.3	1.64
Vancouver Island	E225798	IRON RIVER, IMMMEDIATELY UPSTREAM OF BLK 242 ADIT INFLUENCE	125.437	49.9203	2014-07-31 00:01:00	25.1	1.77
Vancouver Island	E225798	IRON RIVER, IMMMEDIATELY UPSTREAM OF BLK 242 ADIT INFLUENCE	125.437	49.9203	2014-08-14 00:01:00	26.2	1.88
Vancouver Island	E225798	IRON RIVER, IMMMEDIATELY UPSTREAM OF BLK 242 ADIT INFLUENCE	125.437	49.9203	2014-08-20 00:01:00	30.8	2.53
Vancouver Island	E229564	NEWCASTLE CREEK FRBC/WQ	125.964	50.3754	1999-02-23	2	0.4
Vancouver Island	E229564	NEWCASTLE CREEK FRBC/WQ	125.964	50.3754	1999-03-02	2.1	0.4
Vancouver Island	E229564	NEWCASTLE CREEK FRBC/WQ	125.964	50.3754	1999-02-18	2.2	0.4
Vancouver Island	E229564	NEWCASTLE CREEK FRBC/WQ	125.964	50.3754	1998-12-01	3.07	0.441
Vancouver Island	E229564	NEWCASTLE CREEK FRBC/WQ	125.964	50.3754	1998-03-17 13:30:00	2.32	0.446
Vancouver Island	E229564	NEWCASTLE CREEK FRBC/WQ	125.964	50.3754	1999-03-09	2.6	0.5
Vancouver Island	E229564	NEWCASTLE CREEK FRBC/WQ	125.964	50.3754	2009-10-14 15:03:00	4.41	0.89
Vancouver Island	E229564	NEWCASTLE CREEK FRBC/WQ	125.964	50.3754	2009-08-05 14:27:00	5.01	1
Vancouver Island	E229565	TSULQUATE RIVER	127.529	50.7296	1999-02-15 11:30:00	1.2	0.2
Vancouver Island	E229565	TSULQUATE RIVER	127.529	50.7296	1999-03-02 09:45:00	1.2	0.2
Vancouver Island	E229565	TSULQUATE RIVER	127.529	50.7296	1999-02-24 09:00:00	1	0.3
Vancouver Island	E229565	TSULQUATE RIVER	127.529	50.7296	1999-03-02 09:30:00	1.2	0.3
Vancouver Island	E229565	TSULQUATE RIVER	127.529	50.7296	1999-03-08 09:30:00	1.3	0.3
Vancouver Island	E229565	TSULQUATE RIVER	127.529	50.7296	1999-03-08 09:45:00	1.3	0.3
Vancouver Island	E229565	TSULQUATE RIVER	127.529	50.7296	1998-03-18 08:30:00	1.43	0.322
Vancouver Island	E229565	TSULQUATE RIVER	127.529	50.7296	1998-12-02	1.4	0.361
Vancouver Island	E229565	TSULQUATE RIVER	127.529	50.7296	1999-02-09 11:15:00	1.4	0.4
Vancouver Island	E229565	TSULQUATE RIVER	127.529	50.7296	2009-10-07 09:34:00	1.99	0.49
Vancouver Island	E229565	TSULQUATE RIVER	127.529	50.7296	2009-08-04 09:01:00	2.49	0.53
Vancouver Island	E229565	TSULQUATE RIVER	127.529	50.7296	2009-08-13 10:03:00	2.74	0.62
Vancouver Island	E230197	CHINA CREEK INTAKE	124.762	49.1781	2001-11-20 13:09:00	11	0.7
Vancouver Island	E230197	CHINA CREEK INTAKE	124.762	49.1781	1998-01-15 10:30:00	11.2	0.7
Vancouver Island	E230197	CHINA CREEK INTAKE	124.762	49.1781	2001-10-31 11:00:00	14.1	0.8
Vancouver Island	E230197	CHINA CREEK INTAKE	124.762	49.1781	2001-11-14 09:50:00	13.3	0.80066
Vancouver Island	E230197	CHINA CREEK INTAKE	124.762	49.1781	1998-03-02 13:47:00	16.1	0.9
Vancouver Island	E230197	CHINA CREEK INTAKE	124.762	49.1781	2001-10-22 14:00:00	18.2	1.10787
Vancouver Island	E230197	CHINA CREEK INTAKE	124.762	49.1781	2001-10-22 14:00:00	18	1.12523
Vancouver Island	E230197	CHINA CREEK INTAKE	124.762	49.1781	2001-11-05 13:00:00	19.2	1.14825
Vancouver Island	E230197	CHINA CREEK INTAKE	124.762	49.1781	2009-08-12 07:55:00	25.7	1.45
Vancouver Island	E230257	MERCANTILE CREEK AT INTAKE	125.542	48.9664	1998-01-20 12:00:00	1.74	0.45
Vancouver Island	E230257	MERCANTILE CREEK AT INTAKE	125.542	48.9664	2010-10-13 08:40:00	3.22	0.7
Vancouver Island	E230257	MERCANTILE CREEK AT INTAKE	125.542	48.9664	2010-08-11 08:25:00	6.97	1.2
Vancouver Island	E230718	MCKELVIE CREEK AT TAHSIS INTAKE	126.85	49.8444	1999-02-16 12:15:00	1.6	0.4
Vancouver Island	E230718	MCKELVIE CREEK AT TAHSIS INTAKE	126.85	49.8444	1999-02-16 12:30:00	1.6	0.4
Vancouver Island	E230718	MCKELVIE CREEK AT TAHSIS INTAKE	126.85	49.8444	1998-02-10 14:30:00	3.11	0.551
Vancouver Island	E230718	MCKELVIE CREEK AT TAHSIS INTAKE	126.85	49.8444	1999-02-23 12:00:00	2.9	0.6
Vancouver Island	E230718	MCKELVIE CREEK AT TAHSIS INTAKE	126.85	49.8444	1999-03-09	3.4	0.6
Vancouver Island	E230718	MCKELVIE CREEK AT TAHSIS INTAKE	126.85	49.8444	2009-08-10 08:35:00	3.43	0.69
Vancouver Island	E230718	MCKELVIE CREEK AT TAHSIS INTAKE	126.85	49.8444	1999-03-01 11:40:00	3.1	0.7
Vancouver Island	E230718	MCKELVIE CREEK AT TAHSIS INTAKE	126.85	49.8444	1999-02-10 12:15:00	3.7	0.7
Vancouver Island	E230719	ZEBALLOS RIVER AT PUMPHOUSE	126.852	49.996	1998-02-11 08:30:00	6.1	0.543
Vancouver Island	E230719	ZEBALLOS RIVER AT PUMPHOUSE	126.852	49.996	1998-03-18 11:30:00	7.09	0.697
Vancouver Island	E234124	COWICHAN RIVER AT VIMY BEACH	123.77	48.7622	1998-12-01 11:15:00	7.41	0.633
Vancouver Island	E234124	COWICHAN RIVER AT VIMY BEACH	123.77	48.7622	1999-06-08 10:40:00	7	0.649
Vancouver Island	E234124	COWICHAN RIVER AT VIMY BEACH	123.77	48.7622	1998-11-24 10:30:00	6.9	0.661
Vancouver Island	E234124	COWICHAN RIVER AT VIMY BEACH	123.77	48.7622	2014-07-29 12:15:00	9.12	0.926
Vancouver Island	E235457	TOD CREEK, PROSPECT LAKE	123.439	48.5217	2017-11-06 09:00:00	13.1	3.15
Vancouver Island	E235457	TOD CREEK, PROSPECT LAKE	123.439	48.5217	2017-11-14 10:00:00	15.7	3.27
Vancouver Island	E235457	TOD CREEK, PROSPECT LAKE	123.439	48.5217	2017-10-24 10:30:00	16.1	3.34
Vancouver Island	E235457	TOD CREEK, PROSPECT LAKE	123.439	48.5217	2017-10-18 08:45:00	14.7	3.37
Vancouver Island	E235457	TOD CREEK, PROSPECT LAKE	123.439	48.5217	2017-10-31 10:30:00	18.2	3.75
Vancouver Island	E235750	TEANOOK LAKE	123.508	48.4883	2000-02-23	7.7	1.9
Vancouver Island	E235750	TEANOOK LAKE	123.508	48.4883	2000-02-23	7.7	1.9
Vancouver Island	E235750	TEANOOK LAKE	123.508	48.4883	2000-02-23	7.8	1.9
Vancouver Island	E236083	TEANOOK LAKE SITE 2	123.507	48.4889	2000-02-23	7.8	1.9
Vancouver Island	E236086	TEANOOK LAKE SITE 6	123.507	48.4878	2000-02-23	7.7	1.9
Vancouver Island	E240484	THIRD LAKE SAMPLING SITE #4	123.5	48.5306	2004-03-15 11:20:00	6.35	1.21
Vancouver Island	E240484	THIRD LAKE SAMPLING SITE #4	123.5	48.5306	2004-03-15 11:25:00	6.41	1.21
Vancouver Island	E240484	THIRD LAKE SAMPLING SITE #4	123.5	48.5306	2005-03-02 11:45:00	6.38	1.24
Vancouver Island	E240484	THIRD LAKE SAMPLING SITE #4	123.5	48.5306	2005-03-02 11:50:00	6.71	1.25
Vancouver Island	E243893	LEECH RIVER	123.71	48.4931	2001-11-15 12:55:00	2	0.5
Vancouver Island	E243893	LEECH RIVER	123.71	48.4931	2001-11-21 11:50:00	2	0.5
Vancouver Island	E243893	LEECH RIVER	123.71	48.4931	2001-11-15 12:50:00	3.4	0.5
Vancouver Island	E243893	LEECH RIVER	123.71	48.4931	2001-11-08 12:20:00	2.6	0.6
Vancouver Island	E243893	LEECH RIVER	123.71	48.4931	2001-10-25 13:00:00	2.8	0.74848
Vancouver Island	E243893	LEECH RIVER	123.71	48.4931	2001-11-01 14:00:00	2.5	0.75997
Vancouver Island	E243893	LEECH RIVER	123.71	48.4931	2001-10-25 13:05:00	2.6	0.7983
Vancouver Island	E243893	LEECH RIVER	123.71	48.4931	2001-10-18 13:40:00	4.6	0.8
Vancouver Island	E246501	BAINBRIDGE LAKE	124.76	49.185	2001-11-20 12:45:00	7	0.8
Vancouver Island	E246501	BAINBRIDGE LAKE	124.76	49.185	2001-10-31 10:20:00	11	1.1
Vancouver Island	E246501	BAINBRIDGE LAKE	124.76	49.185	2001-11-14 09:20:00	11	1.15587
Vancouver Island	E246501	BAINBRIDGE LAKE	124.76	49.185	2001-11-05 12:40:00	12.7	1.3
Vancouver Island	E248112	MURIEL LAKE	125.611	49.1364	2002-04-02 16:00:00	2.32	0.36
Vancouver Island	E248113	ANTLER LAKE	126.052	49.8047	2002-03-13 16:00:00	9.25	0.96
Vancouver Island	E248618	COLWOOD CREEK (C12)	123.476	48.4383	2017-10-25 12:20:00	14.5	3.64
Vancouver Island	E248618	COLWOOD CREEK (C12)	123.476	48.4383	2017-11-15 12:00:00	14.3	3.7
Vancouver Island	E248618	COLWOOD CREEK (C12)	123.476	48.4383	2017-11-01 12:50:00	18.8	4.97
Vancouver Island	E248618	COLWOOD CREEK (C12)	123.476	48.4383	2017-11-08 12:10:00	21.3	5.78
Vancouver Island	E248618	COLWOOD CREEK (C12)	123.476	48.4383	2017-10-18 10:55:00	23.3	6.43
Vancouver Island	E248835	MORRISON CREEK JUST UPSTREAM ENGLISHMAN RIVER	124.309	49.2822	2010-11-01 11:00:00	6.93	2.26
Vancouver Island	E248835	MORRISON CREEK JUST UPSTREAM ENGLISHMAN RIVER	124.309	49.2822	2010-09-13 14:00:00	9.04	2.87
Vancouver Island	E248835	MORRISON CREEK JUST UPSTREAM ENGLISHMAN RIVER	124.309	49.2822	2010-08-16 13:05:00	9.6	2.88
Vancouver Island	E248836	SOUTH ENGLISHMAN RIVER JUST U/S ENGLISHMAN RIVER	124.297	49.2783	2010-11-01 12:32:00	3.43	0.61
Vancouver Island	E248836	SOUTH ENGLISHMAN RIVER JUST U/S ENGLISHMAN RIVER	124.297	49.2783	2010-08-16 15:30:00	23.1	3.79
Vancouver Island	E248836	SOUTH ENGLISHMAN RIVER JUST U/S ENGLISHMAN RIVER	124.297	49.2783	2010-09-14 13:30:00	25.7	4.34
Vancouver Island	E248874	SAN JUAN RIVER @ISLAND ROAD	123.412	48.4589	2006-12-10 14:48:00	4.31	0.47
Vancouver Island	E248874	SAN JUAN RIVER @ISLAND ROAD	123.412	48.4589	2008-05-27 17:00:00	5.5	0.47
Vancouver Island	E248874	SAN JUAN RIVER @ISLAND ROAD	123.412	48.4589	2007-03-18 10:15:00	4.2	0.48
Vancouver Island	E248874	SAN JUAN RIVER @ISLAND ROAD	123.412	48.4589	2007-02-18 12:09:00	4.66	0.48
Vancouver Island	E248874	SAN JUAN RIVER @ISLAND ROAD	123.412	48.4589	2007-03-26 08:45:00	4.99	0.5
Vancouver Island	E248874	SAN JUAN RIVER @ISLAND ROAD	123.412	48.4589	2007-10-22 09:03:00	4.47	0.53
Vancouver Island	E248874	SAN JUAN RIVER @ISLAND ROAD	123.412	48.4589	2008-02-11 09:45:00	5.17	0.54
Vancouver Island	E248874	SAN JUAN RIVER @ISLAND ROAD	123.412	48.4589	2006-01-12 11:07:00	4.97	0.55
Vancouver Island	E248874	SAN JUAN RIVER @ISLAND ROAD	123.412	48.4589	2005-12-27 09:15:00	5.69	0.56
Vancouver Island	E248874	SAN JUAN RIVER @ISLAND ROAD	123.412	48.4589	2008-11-12 13:15:00	4.7	0.57
Vancouver Island	E248874	SAN JUAN RIVER @ISLAND ROAD	123.412	48.4589	2004-12-14 08:13:00	4.52	0.58
Vancouver Island	E248874	SAN JUAN RIVER @ISLAND ROAD	123.412	48.4589	2004-02-19 12:00:00	5.19	0.58
Vancouver Island	E248874	SAN JUAN RIVER @ISLAND ROAD	123.412	48.4589	2006-04-12 12:15:00	6.04	0.59
Vancouver Island	E248874	SAN JUAN RIVER @ISLAND ROAD	123.412	48.4589	2006-11-20 12:26:00	5.24	0.6
Vancouver Island	E248874	SAN JUAN RIVER @ISLAND ROAD	123.412	48.4589	2007-01-08 12:27:00	4.79	0.62
Vancouver Island	E248874	SAN JUAN RIVER @ISLAND ROAD	123.412	48.4589	2008-03-02 02:30:00	6.05	0.62
Vancouver Island	E248874	SAN JUAN RIVER @ISLAND ROAD	123.412	48.4589	2009-04-19 08:32:00	6.39	0.63
Vancouver Island	E248874	SAN JUAN RIVER @ISLAND ROAD	123.412	48.4589	2009-01-19 12:32:00	5.95	0.64
Vancouver Island	E248874	SAN JUAN RIVER @ISLAND ROAD	123.412	48.4589	2005-04-05 09:25:00	6.3	0.64
Vancouver Island	E248874	SAN JUAN RIVER @ISLAND ROAD	123.412	48.4589	2008-01-07 02:45:00	6.78	0.64
Vancouver Island	E248874	SAN JUAN RIVER @ISLAND ROAD	123.412	48.4589	2009-01-19 12:45:00	6.35	0.65
Vancouver Island	E248874	SAN JUAN RIVER @ISLAND ROAD	123.412	48.4589	2008-04-13 12:30:00	6.73	0.65
Vancouver Island	E248874	SAN JUAN RIVER @ISLAND ROAD	123.412	48.4589	2006-03-07 10:30:00	5.24	0.66
Vancouver Island	E248874	SAN JUAN RIVER @ISLAND ROAD	123.412	48.4589	2007-04-10 09:25:00	5.7	0.66
Vancouver Island	E248874	SAN JUAN RIVER @ISLAND ROAD	123.412	48.4589	2009-05-04 09:02:00	6.09	0.66
Vancouver Island	E248874	SAN JUAN RIVER @ISLAND ROAD	123.412	48.4589	2008-04-28 13:00:00	6.16	0.66
Vancouver Island	E248874	SAN JUAN RIVER @ISLAND ROAD	123.412	48.4589	2006-01-24 11:28:00	5.76	0.67
Vancouver Island	E248874	SAN JUAN RIVER @ISLAND ROAD	123.412	48.4589	2005-03-22 08:20:00	6.05	0.67
Vancouver Island	E248874	SAN JUAN RIVER @ISLAND ROAD	123.412	48.4589	2008-03-16 12:45:00	6.36	0.67
Vancouver Island	E248874	SAN JUAN RIVER @ISLAND ROAD	123.412	48.4589	2008-11-25 13:00:00	5.98	0.68
Vancouver Island	E248874	SAN JUAN RIVER @ISLAND ROAD	123.412	48.4589	2007-03-04 15:45:00	6.14	0.68
Vancouver Island	E248874	SAN JUAN RIVER @ISLAND ROAD	123.412	48.4589	2005-04-19 09:30:00	6.47	0.68
Vancouver Island	E248874	SAN JUAN RIVER @ISLAND ROAD	123.412	48.4589	2004-11-02 13:15:00	5.53	0.69
Vancouver Island	E248874	SAN JUAN RIVER @ISLAND ROAD	123.412	48.4589	2004-03-24 12:15:00	5.58	0.69
Vancouver Island	E248874	SAN JUAN RIVER @ISLAND ROAD	123.412	48.4589	2007-12-18 11:30:00	6.38	0.7
Vancouver Island	E248874	SAN JUAN RIVER @ISLAND ROAD	123.412	48.4589	2006-02-07 11:32:00	6.15	0.71
Vancouver Island	E248874	SAN JUAN RIVER @ISLAND ROAD	123.412	48.4589	2004-01-29 13:45:00	4.77	0.73
Vancouver Island	E248874	SAN JUAN RIVER @ISLAND ROAD	123.412	48.4589	2008-02-17 15:15:00	6.96	0.73
Vancouver Island	E248874	SAN JUAN RIVER @ISLAND ROAD	123.412	48.4589	2005-03-08 09:11:00	6.67	0.74
Vancouver Island	E248874	SAN JUAN RIVER @ISLAND ROAD	123.412	48.4589	2004-12-28 11:00:00	7.01	0.74
Vancouver Island	E248874	SAN JUAN RIVER @ISLAND ROAD	123.412	48.4589	2008-03-31 09:30:00	7.04	0.74
Vancouver Island	E248874	SAN JUAN RIVER @ISLAND ROAD	123.412	48.4589	2007-11-05 08:37:00	6.1	0.76
Vancouver Island	E248874	SAN JUAN RIVER @ISLAND ROAD	123.412	48.4589	2009-03-16 09:38:00	6.44	0.78
Vancouver Island	E248874	SAN JUAN RIVER @ISLAND ROAD	123.412	48.4589	2007-06-18 09:05:00	8.74	0.78
Vancouver Island	E248874	SAN JUAN RIVER @ISLAND ROAD	123.412	48.4589	2007-07-29 11:45:00	9.55	0.79
Vancouver Island	E248874	SAN JUAN RIVER @ISLAND ROAD	123.412	48.4589	2007-07-10 09:00:00	9.16	0.81
Vancouver Island	E248874	SAN JUAN RIVER @ISLAND ROAD	123.412	48.4589	2007-10-08 11:30:00	6.54	0.82
Vancouver Island	E248874	SAN JUAN RIVER @ISLAND ROAD	123.412	48.4589	2008-01-20 14:45:00	6.94	0.83
Vancouver Island	E248874	SAN JUAN RIVER @ISLAND ROAD	123.412	48.4589	2006-04-18 13:13:00	6.75	0.85
Vancouver Island	E248874	SAN JUAN RIVER @ISLAND ROAD	123.412	48.4589	2007-05-07 13:42:00	7.06	0.85
Vancouver Island	E248874	SAN JUAN RIVER @ISLAND ROAD	123.412	48.4589	2009-02-09 09:40:00	7.52	0.86
Vancouver Island	E248874	SAN JUAN RIVER @ISLAND ROAD	123.412	48.4589	2007-08-12 09:02:00	9.64	0.87
Vancouver Island	E248874	SAN JUAN RIVER @ISLAND ROAD	123.412	48.4589	2009-03-30 10:40:00	7.36	0.88
Vancouver Island	E248874	SAN JUAN RIVER @ISLAND ROAD	123.412	48.4589	2007-07-16 11:30:00	9.44	0.88
Vancouver Island	E248874	SAN JUAN RIVER @ISLAND ROAD	123.412	48.4589	2007-08-27 09:30:00	9.81	0.9
Vancouver Island	E248874	SAN JUAN RIVER @ISLAND ROAD	123.412	48.4589	2007-01-21 09:10:00	6.1	0.91
Vancouver Island	E248874	SAN JUAN RIVER @ISLAND ROAD	123.412	48.4589	2005-10-18 11:45:00	6.47	0.91
Vancouver Island	E248874	SAN JUAN RIVER @ISLAND ROAD	123.412	48.4589	2004-11-16 09:50:00	6.64	0.91
Vancouver Island	E248874	SAN JUAN RIVER @ISLAND ROAD	123.412	48.4589	2008-09-16 10:30:00	9.82	0.92
Vancouver Island	E248874	SAN JUAN RIVER @ISLAND ROAD	123.412	48.4589	2007-09-25 18:30:00	10.2	0.92
Vancouver Island	E248874	SAN JUAN RIVER @ISLAND ROAD	123.412	48.4589	2007-02-04 10:44:00	7.83	0.93
Vancouver Island	E248874	SAN JUAN RIVER @ISLAND ROAD	123.412	48.4589	2006-09-11 15:30:00	10.2	0.93
Vancouver Island	E248874	SAN JUAN RIVER @ISLAND ROAD	123.412	48.4589	2006-07-31 11:00:00	9.88	0.94
Vancouver Island	E248874	SAN JUAN RIVER @ISLAND ROAD	123.412	48.4589	2007-09-10 17:30:00	10.1	0.96
Vancouver Island	E248874	SAN JUAN RIVER @ISLAND ROAD	123.412	48.4589	2007-04-22 12:05:00	6.76	0.97
Vancouver Island	E248874	SAN JUAN RIVER @ISLAND ROAD	123.412	48.4589	2007-09-26 08:30:00	9.63	0.97
Vancouver Island	E248874	SAN JUAN RIVER @ISLAND ROAD	123.412	48.4589	2007-11-20 09:20:00	7.27	1.01
Vancouver Island	E248874	SAN JUAN RIVER @ISLAND ROAD	123.412	48.4589	2004-10-19 13:15:00	8.78	1.02
Vancouver Island	E248874	SAN JUAN RIVER @ISLAND ROAD	123.412	48.4589	2008-10-12 12:20:00	8.74	1.04
Vancouver Island	E248874	SAN JUAN RIVER @ISLAND ROAD	123.412	48.4589	2006-11-13 10:53:00	5.31	1.09
Vancouver Island	E248874	SAN JUAN RIVER @ISLAND ROAD	123.412	48.4589	2004-03-09 11:11:00	5.68	1.12
Vancouver Island	E248874	SAN JUAN RIVER @ISLAND ROAD	123.412	48.4589	2004-12-08 10:23:00	6.9	1.13
Vancouver Island	E248874	SAN JUAN RIVER @ISLAND ROAD	123.412	48.4589	2006-05-02 10:10:00	7.19	1.14
Vancouver Island	E248874	SAN JUAN RIVER @ISLAND ROAD	123.412	48.4589	2005-05-31 11:30:00	9.09	1.22
Vancouver Island	E248874	SAN JUAN RIVER @ISLAND ROAD	123.412	48.4589	2003-12-30 12:50:00	7.13	1.23
Vancouver Island	E248874	SAN JUAN RIVER @ISLAND ROAD	123.412	48.4589	2007-01-14 15:00:00	6.56	1.26
Vancouver Island	E248874	SAN JUAN RIVER @ISLAND ROAD	123.412	48.4589	2007-11-27 10:45:00	8.41	1.26
Vancouver Island	E248874	SAN JUAN RIVER @ISLAND ROAD	123.412	48.4589	2003-10-22 13:30:00	6.2	1.27
Vancouver Island	E248874	SAN JUAN RIVER @ISLAND ROAD	123.412	48.4589	2004-10-06 13:00:00	9.29	1.42
Vancouver Island	E248874	SAN JUAN RIVER @ISLAND ROAD	123.412	48.4589	2006-05-17 12:17:00	6.52	1.53
Vancouver Island	E248874	SAN JUAN RIVER @ISLAND ROAD	123.412	48.4589	2005-07-12 10:30:00	9.19	1.59
Vancouver Island	E248874	SAN JUAN RIVER @ISLAND ROAD	123.412	48.4589	2006-03-21 10:15:00	7.01	1.7
Vancouver Island	E248874	SAN JUAN RIVER @ISLAND ROAD	123.412	48.4589	2008-12-09 12:38:00	7.9	1.83
Vancouver Island	E248874	SAN JUAN RIVER @ISLAND ROAD	123.412	48.4589	2004-09-20 15:15:00	9.2	2.06
Vancouver Island	E248874	SAN JUAN RIVER @ISLAND ROAD	123.412	48.4589	2006-10-31 08:40:00	9.72	2.25
Vancouver Island	E248874	SAN JUAN RIVER @ISLAND ROAD	123.412	48.4589	2008-01-28 10:15:00	8.06	2.29
Vancouver Island	E248874	SAN JUAN RIVER @ISLAND ROAD	123.412	48.4589	2007-01-01 12:45:00	8.08	2.55
Vancouver Island	E248874	SAN JUAN RIVER @ISLAND ROAD	123.412	48.4589	2005-06-14 09:55:00	9.8	2.61
Vancouver Island	E248874	SAN JUAN RIVER @ISLAND ROAD	123.412	48.4589	2004-04-21 13:45:00	8.56	2.83
Vancouver Island	E248874	SAN JUAN RIVER @ISLAND ROAD	123.412	48.4589	2005-01-11 10:09:00	10.5	3.18
Vancouver Island	E248874	SAN JUAN RIVER @ISLAND ROAD	123.412	48.4589	2006-02-21 10:28:00	9.59	3.26
Vancouver Island	E248874	SAN JUAN RIVER @ISLAND ROAD	123.412	48.4589	2005-10-04 10:30:00	10.6	4.41
Vancouver Island	E248874	SAN JUAN RIVER @ISLAND ROAD	123.412	48.4589	2008-09-29 10:00:00	10.5	4.9
Vancouver Island	E248874	SAN JUAN RIVER @ISLAND ROAD	123.412	48.4589	2005-05-03 09:45:00	10	5.56
Vancouver Island	E248874	SAN JUAN RIVER @ISLAND ROAD	123.412	48.4589	2005-05-17 11:30:00	10.5	5.95
Vancouver Island	E248874	SAN JUAN RIVER @ISLAND ROAD	123.412	48.4589	2005-02-21 15:00:00	10.8	6.86
Vancouver Island	E248874	SAN JUAN RIVER @ISLAND ROAD	123.412	48.4589	2004-01-22 12:45:00	8.88	6.94
Vancouver Island	E248874	SAN JUAN RIVER @ISLAND ROAD	123.412	48.4589	2006-05-30 08:04:00	9.25	8.15
Vancouver Island	E248874	SAN JUAN RIVER @ISLAND ROAD	123.412	48.4589	2004-06-08 17:30:00	11.3	8.4
Vancouver Island	E248874	SAN JUAN RIVER @ISLAND ROAD	123.412	48.4589	2005-02-08 11:15:00	10.4	9.79
Vancouver Island	E248874	SAN JUAN RIVER @ISLAND ROAD	123.412	48.4589	2005-01-25 12:00:00	9.77	11.4
Vancouver Island	E248874	SAN JUAN RIVER @ISLAND ROAD	123.412	48.4589	2004-09-14 10:15:00	14.3	14.4
Vancouver Island	E248874	SAN JUAN RIVER @ISLAND ROAD	123.412	48.4589	2008-02-03 12:30:00	12.7	15.5
Vancouver Island	E248874	SAN JUAN RIVER @ISLAND ROAD	123.412	48.4589	2006-12-03 12:30:00	13.4	17.2
Vancouver Island	E248874	SAN JUAN RIVER @ISLAND ROAD	123.412	48.4589	2005-11-29 11:35:00	13	18
Vancouver Island	E248874	SAN JUAN RIVER @ISLAND ROAD	123.412	48.4589	2004-08-31 10:35:00	17.3	18.4
Vancouver Island	E248874	SAN JUAN RIVER @ISLAND ROAD	123.412	48.4589	2004-08-24 10:40:00	17.8	19.6
Vancouver Island	E248874	SAN JUAN RIVER @ISLAND ROAD	123.412	48.4589	2005-06-28 11:35:00	15.6	19.9
Vancouver Island	E248874	SAN JUAN RIVER @ISLAND ROAD	123.412	48.4589	2005-12-13 11:15:00	17.1	24.9
Vancouver Island	E248874	SAN JUAN RIVER @ISLAND ROAD	123.412	48.4589	2004-06-21 15:30:00	18.9	28.2
Vancouver Island	E248874	SAN JUAN RIVER @ISLAND ROAD	123.412	48.4589	2008-10-29 13:44:00	22.1	34.5
Vancouver Island	E248874	SAN JUAN RIVER @ISLAND ROAD	123.412	48.4589	2004-07-07 12:45:00	31.8	52.9
Vancouver Island	E248874	SAN JUAN RIVER @ISLAND ROAD	123.412	48.4589	2005-09-06 10:03:00	28.5	53.7
Vancouver Island	E248874	SAN JUAN RIVER @ISLAND ROAD	123.412	48.4589	2004-05-25 12:00:00	32.2	73.5
Vancouver Island	E248874	SAN JUAN RIVER @ISLAND ROAD	123.412	48.4589	2002-10-29 09:05:00	34.5	74.9
Vancouver Island	E248874	SAN JUAN RIVER @ISLAND ROAD	123.412	48.4589	2002-10-23 08:05:00	35.3	78.3
Vancouver Island	E248874	SAN JUAN RIVER @ISLAND ROAD	123.412	48.4589	2005-08-09 15:30:00	37.1	86
Vancouver Island	E248874	SAN JUAN RIVER @ISLAND ROAD	123.412	48.4589	2003-09-10 11:15:00	41	86.8
Vancouver Island	E248874	SAN JUAN RIVER @ISLAND ROAD	123.412	48.4589	2004-07-20 11:40:00	41.8	86.9
Vancouver Island	E248874	SAN JUAN RIVER @ISLAND ROAD	123.412	48.4589	2005-09-20 09:35:00	41	89.8
Vancouver Island	E248874	SAN JUAN RIVER @ISLAND ROAD	123.412	48.4589	2004-08-10 10:10:00	48.2	93
Vancouver Island	E248874	SAN JUAN RIVER @ISLAND ROAD	123.412	48.4589	2004-08-03 11:30:00	55.9	115
Vancouver Island	E248874	SAN JUAN RIVER @ISLAND ROAD	123.412	48.4589	2004-08-17 11:05:00	61	131
Vancouver Island	E248874	SAN JUAN RIVER @ISLAND ROAD	123.412	48.4589	2006-10-10 12:55:00	57.5	142
Vancouver Island	E259337	JOHN HART LAKE MID LAKE SITE	125.351	50.0436	2011-03-09 09:20:00	6.88	0.81
Vancouver Island	E259337	JOHN HART LAKE MID LAKE SITE	125.351	50.0436	2011-03-09 09:20:00	6.86	0.82
Vancouver Island	E259337	JOHN HART LAKE MID LAKE SITE	125.351	50.0436	2011-03-09 09:20:00	6.95	0.83
Vancouver Island	E259337	JOHN HART LAKE MID LAKE SITE	125.351	50.0436	2010-08-19 09:30:00	7.31	0.84
Vancouver Island	E259337	JOHN HART LAKE MID LAKE SITE	125.351	50.0436	2010-08-19 09:27:00	7.5	0.85
Vancouver Island	E259337	JOHN HART LAKE MID LAKE SITE	125.351	50.0436	2010-11-24 12:00:00	7.79	0.85
Vancouver Island	E259337	JOHN HART LAKE MID LAKE SITE	125.351	50.0436	2010-11-24 12:05:00	7.59	0.86
Vancouver Island	E259337	JOHN HART LAKE MID LAKE SITE	125.351	50.0436	2010-05-26 10:05:00	7.03	0.88
Vancouver Island	E259337	JOHN HART LAKE MID LAKE SITE	125.351	50.0436	2010-05-26 10:00:00	7.21	0.88
Vancouver Island	E259337	JOHN HART LAKE MID LAKE SITE	125.351	50.0436	2010-08-19 09:35:00	7.08	0.89
Vancouver Island	E259337	JOHN HART LAKE MID LAKE SITE	125.351	50.0436	2010-05-26 10:10:00	7.44	0.92
Vancouver Island	E259337	JOHN HART LAKE MID LAKE SITE	125.351	50.0436	2010-11-24 12:10:00	7.54	1.32
Vancouver Island	E259497	COMOX LAKE INLET BASIN - MID LAKE	125.179	49.5633	2007-10-23 10:50:00	13.1291	0.79
Vancouver Island	E259497	COMOX LAKE INLET BASIN - MID LAKE	125.179	49.5633	2007-10-23 10:45:00	13.0291	0.81
Vancouver Island	E259497	COMOX LAKE INLET BASIN - MID LAKE	125.179	49.5633	2007-10-23 10:55:00	13.8997	0.86
Vancouver Island	E259497	COMOX LAKE INLET BASIN - MID LAKE	125.179	49.5633	2008-03-19 11:00:00	6.54	0.97
Vancouver Island	E259497	COMOX LAKE INLET BASIN - MID LAKE	125.179	49.5633	2008-03-19 11:00:00	6.63	0.99
Vancouver Island	E259497	COMOX LAKE INLET BASIN - MID LAKE	125.179	49.5633	2008-03-19 11:00:00	6.47	1.04
Vancouver Island	E259498	COMOX LAKE MAIN BASIN, MID LAKE	125.176	49.6136	2007-10-23 12:00:00	12.0939	0.75
Vancouver Island	E259498	COMOX LAKE MAIN BASIN, MID LAKE	125.176	49.6136	2007-10-23 11:55:00	12.3527	0.76
Vancouver Island	E259498	COMOX LAKE MAIN BASIN, MID LAKE	125.176	49.6136	2008-03-19 11:40:00	5.39	0.79
Vancouver Island	E259498	COMOX LAKE MAIN BASIN, MID LAKE	125.176	49.6136	2008-03-19 11:40:00	5.41	0.79
Vancouver Island	E259498	COMOX LAKE MAIN BASIN, MID LAKE	125.176	49.6136	2007-10-23 12:05:00	13.1056	0.83
Vancouver Island	E259498	COMOX LAKE MAIN BASIN, MID LAKE	125.176	49.6136	2008-03-19 11:40:00	5.4	0.86
Vancouver Island	E259499	COMOX LAKE OUTLET BASIN, MID LAKE	125.087	49.6333	2007-10-23 12:30:00	12.1939	0.74
Vancouver Island	E259499	COMOX LAKE OUTLET BASIN, MID LAKE	125.087	49.6333	2007-10-23 12:25:00	12.2939	0.77
Vancouver Island	E259499	COMOX LAKE OUTLET BASIN, MID LAKE	125.087	49.6333	2007-10-23 12:35:00	12.1115	0.78
Vancouver Island	E259499	COMOX LAKE OUTLET BASIN, MID LAKE	125.087	49.6333	2008-03-19 12:15:00	5.4	0.8
Vancouver Island	E259499	COMOX LAKE OUTLET BASIN, MID LAKE	125.087	49.6333	2008-03-19 12:15:00	5.41	0.8
Vancouver Island	E259499	COMOX LAKE OUTLET BASIN, MID LAKE	125.087	49.6333	2008-03-19 12:15:00	5.39	0.88
Vancouver Island	E259499	COMOX LAKE OUTLET BASIN, MID LAKE	125.087	49.6333	2016-03-03 10:55:00	5.86	0.895
Vancouver Island	E259499	COMOX LAKE OUTLET BASIN, MID LAKE	125.087	49.6333	2016-03-03 10:45:00	5.67	0.898
Vancouver Island	E259499	COMOX LAKE OUTLET BASIN, MID LAKE	125.087	49.6333	2016-03-03 10:35:00	5.61	0.921
Vancouver Island	E267906	SUGSAW LAKE @ INTAKE	125.091	48.8428	2007-10-30	4.60572	0.45
Vancouver Island	E267906	SUGSAW LAKE @ INTAKE	125.091	48.8428	2009-03-25 14:20:00	1.91	0.48
Vancouver Island	E267906	SUGSAW LAKE @ INTAKE	125.091	48.8428	2007-10-16	2.16	0.49
Vancouver Island	E267906	SUGSAW LAKE @ INTAKE	125.091	48.8428	2009-11-24 11:00:00	2.12	0.5
Vancouver Island	E267906	SUGSAW LAKE @ INTAKE	125.091	48.8428	2009-11-12 11:00:00	2.39	0.53
Vancouver Island	E267906	SUGSAW LAKE @ INTAKE	125.091	48.8428	2008-05-15 13:50:00	2.34	0.54
Vancouver Island	E267906	SUGSAW LAKE @ INTAKE	125.091	48.8428	2007-11-06	5.45864	0.54
Vancouver Island	E267906	SUGSAW LAKE @ INTAKE	125.091	48.8428	2008-09-09	2.53	0.55
Vancouver Island	E267906	SUGSAW LAKE @ INTAKE	125.091	48.8428	2009-08-11 11:30:00	2.65	0.55
Vancouver Island	E267906	SUGSAW LAKE @ INTAKE	125.091	48.8428	2009-10-27 12:50:00	2.4	0.56
Vancouver Island	E267906	SUGSAW LAKE @ INTAKE	125.091	48.8428	2008-09-02 10:00:00	2.48	0.56
Vancouver Island	E267906	SUGSAW LAKE @ INTAKE	125.091	48.8428	2009-09-01 11:00:00	2.66	0.56
Vancouver Island	E267906	SUGSAW LAKE @ INTAKE	125.091	48.8428	2009-11-03 11:00:00	2.56	0.57
Vancouver Island	E267906	SUGSAW LAKE @ INTAKE	125.091	48.8428	2009-08-25 11:30:00	2.69	0.57
Vancouver Island	E267906	SUGSAW LAKE @ INTAKE	125.091	48.8428	2007-10-23	5.04684	0.57
Vancouver Island	E267906	SUGSAW LAKE @ INTAKE	125.091	48.8428	2009-08-18 11:30:00	2.62	0.58
Vancouver Island	E267906	SUGSAW LAKE @ INTAKE	125.091	48.8428	2009-08-06 12:25:00	2.69	0.58
Vancouver Island	E267906	SUGSAW LAKE @ INTAKE	125.091	48.8428	2009-11-17 11:00:00	2.41	0.59
Vancouver Island	E267906	SUGSAW LAKE @ INTAKE	125.091	48.8428	2008-08-11 12:35:00	2.63	0.59
Vancouver Island	E267906	SUGSAW LAKE @ INTAKE	125.091	48.8428	2008-08-19 10:00:00	2.64	0.59
Vancouver Island	E267906	SUGSAW LAKE @ INTAKE	125.091	48.8428	2008-08-26 10:30:00	2.69	0.65
Vancouver Island	E268993	LITTLE QUALICUM RIVER - 1.2KM D/S CAMERON LAKE	124.569	49.291	2011-10-18 11:30:00	11.4	1.25
Vancouver Island	E268993	LITTLE QUALICUM RIVER - 1.2KM D/S CAMERON LAKE	124.569	49.291	2011-08-16 11:40:00	11.4	1.35
Vancouver Island	E275463	BAINBRIDGE LAKE, DEEP STN	124.735	49.2033	2018-02-19	4.82	0.633
Vancouver Island	E276448	CHARTERS CREEK NEAR CONFLUENCE WITH SOOKE RIVER	123.71	48.414	2009-11-18 13:05:00	2.17	0.82
Vancouver Island	E276448	CHARTERS CREEK NEAR CONFLUENCE WITH SOOKE RIVER	123.71	48.414	2017-11-14 09:25:00	2.33	0.857
Vancouver Island	E276448	CHARTERS CREEK NEAR CONFLUENCE WITH SOOKE RIVER	123.71	48.414	2009-11-09 13:30:00	2.45	0.91
Vancouver Island	E276448	CHARTERS CREEK NEAR CONFLUENCE WITH SOOKE RIVER	123.71	48.414	2017-10-24 10:25:00	2.62	0.933
Vancouver Island	E276448	CHARTERS CREEK NEAR CONFLUENCE WITH SOOKE RIVER	123.71	48.414	2017-11-09 09:46:00	2.88	1.04
Vancouver Island	E276448	CHARTERS CREEK NEAR CONFLUENCE WITH SOOKE RIVER	123.71	48.414	2009-11-03 12:19:00	3.1	1.09
Vancouver Island	E276448	CHARTERS CREEK NEAR CONFLUENCE WITH SOOKE RIVER	123.71	48.414	2017-11-01 09:50:00	3.35	1.14
Vancouver Island	E276448	CHARTERS CREEK NEAR CONFLUENCE WITH SOOKE RIVER	123.71	48.414	2009-10-26 12:01:00	3.45	1.25
Vancouver Island	E276448	CHARTERS CREEK NEAR CONFLUENCE WITH SOOKE RIVER	123.71	48.414	2017-08-08 11:45:00	4.42	1.5
Vancouver Island	E276448	CHARTERS CREEK NEAR CONFLUENCE WITH SOOKE RIVER	123.71	48.414	2009-10-19 13:33:00	4.86	1.5
Vancouver Island	E276448	CHARTERS CREEK NEAR CONFLUENCE WITH SOOKE RIVER	123.71	48.414	2017-09-06 09:43:00	4.64	1.51
Vancouver Island	E276448	CHARTERS CREEK NEAR CONFLUENCE WITH SOOKE RIVER	123.71	48.414	2017-10-17 12:15:00	4.75	1.51
Vancouver Island	E276448	CHARTERS CREEK NEAR CONFLUENCE WITH SOOKE RIVER	123.71	48.414	2017-08-29 13:00:00	4.83	1.6
Vancouver Island	E276448	CHARTERS CREEK NEAR CONFLUENCE WITH SOOKE RIVER	123.71	48.414	2017-08-22 09:23:00	4.56	1.62
Vancouver Island	E276448	CHARTERS CREEK NEAR CONFLUENCE WITH SOOKE RIVER	123.71	48.414	2017-08-15 09:55:00	5.09	1.74
Vancouver Island	E276449	TODD CREEK NEAR CONFLUENCE WITH SOOKE RIVER	123.709	48.4302	2009-11-18 12:48:00	2.2	0.84
Vancouver Island	E276449	TODD CREEK NEAR CONFLUENCE WITH SOOKE RIVER	123.709	48.4302	2017-11-14 09:35:00	2.4	0.867
Vancouver Island	E276449	TODD CREEK NEAR CONFLUENCE WITH SOOKE RIVER	123.709	48.4302	2017-10-24 10:40:00	2.69	0.961
Vancouver Island	E276449	TODD CREEK NEAR CONFLUENCE WITH SOOKE RIVER	123.709	48.4302	2009-11-09 13:10:00	2.6	0.98
Vancouver Island	E276449	TODD CREEK NEAR CONFLUENCE WITH SOOKE RIVER	123.709	48.4302	2017-11-09 09:58:00	3	1.06
Vancouver Island	E276449	TODD CREEK NEAR CONFLUENCE WITH SOOKE RIVER	123.709	48.4302	2009-11-03 11:55:00	3.04	1.18
Vancouver Island	E276449	TODD CREEK NEAR CONFLUENCE WITH SOOKE RIVER	123.709	48.4302	2009-10-26 11:38:00	3.27	1.24
Vancouver Island	E276449	TODD CREEK NEAR CONFLUENCE WITH SOOKE RIVER	123.709	48.4302	2017-11-01 10:00:00	3.51	1.28
Vancouver Island	E276449	TODD CREEK NEAR CONFLUENCE WITH SOOKE RIVER	123.709	48.4302	2009-10-19 13:09:00	4.22	1.6
Vancouver Island	E276449	TODD CREEK NEAR CONFLUENCE WITH SOOKE RIVER	123.709	48.4302	2017-10-17 12:30:00	4.83	1.82
Vancouver Island	E276449	TODD CREEK NEAR CONFLUENCE WITH SOOKE RIVER	123.709	48.4302	2017-08-08 11:55:00	5.65	2.08
Vancouver Island	E276449	TODD CREEK NEAR CONFLUENCE WITH SOOKE RIVER	123.709	48.4302	2017-08-22 09:40:00	5.87	2.2
Vancouver Island	E276449	TODD CREEK NEAR CONFLUENCE WITH SOOKE RIVER	123.709	48.4302	2017-08-29 13:11:00	6.35	2.36
Vancouver Island	E276449	TODD CREEK NEAR CONFLUENCE WITH SOOKE RIVER	123.709	48.4302	2017-09-06 09:56:00	6.38	2.38
Vancouver Island	E276449	TODD CREEK NEAR CONFLUENCE WITH SOOKE RIVER	123.709	48.4302	2017-08-15 10:07:00	6.58	2.56
Vancouver Island	E276450	UPPER SOOKE RIVER	123.714	48.4313	2009-11-18 12:57:00	2.19	0.56
Vancouver Island	E276450	UPPER SOOKE RIVER	123.714	48.4313	2017-11-14 09:40:00	2.33	0.626
Vancouver Island	E276450	UPPER SOOKE RIVER	123.714	48.4313	2009-11-09 13:15:00	2.45	0.66
Vancouver Island	E276450	UPPER SOOKE RIVER	123.714	48.4313	2017-10-24 10:50:00	2.68	0.677
Vancouver Island	E276450	UPPER SOOKE RIVER	123.714	48.4313	2009-11-03 12:08:00	2.93	0.71
Vancouver Island	E276450	UPPER SOOKE RIVER	123.714	48.4313	2009-10-26 11:45:00	2.65	0.73
Vancouver Island	E276450	UPPER SOOKE RIVER	123.714	48.4313	2009-10-19 13:20:00	3.49	0.84
Vancouver Island	E276450	UPPER SOOKE RIVER	123.714	48.4313	2017-11-09 10:06:00	3.59	0.859
Vancouver Island	E276450	UPPER SOOKE RIVER	123.714	48.4313	2017-11-01 10:10:00	4.05	0.89
Vancouver Island	E276450	UPPER SOOKE RIVER	123.714	48.4313	2017-08-08 12:05:00	5.12	1.06
Vancouver Island	E276450	UPPER SOOKE RIVER	123.714	48.4313	2017-08-22 09:47:00	5.05	1.07
Vancouver Island	E276450	UPPER SOOKE RIVER	123.714	48.4313	2017-09-06 10:02:00	5.27	1.1
Vancouver Island	E276450	UPPER SOOKE RIVER	123.714	48.4313	2017-08-29 13:20:00	5.37	1.13
Vancouver Island	E276450	UPPER SOOKE RIVER	123.714	48.4313	2017-08-15 10:20:00	5.76	1.23
Vancouver Island	E276450	UPPER SOOKE RIVER	123.714	48.4313	2017-10-17 12:36:00	6.57	1.31
Vancouver Island	E282969	UPPER ENGLISHMAN RIVER U/S CENTRE FORK CREEK	124.373	49.2268	2010-11-01 13:40:00	4.96	0.49
Vancouver Island	E282969	UPPER ENGLISHMAN RIVER U/S CENTRE FORK CREEK	124.373	49.2268	2010-09-14 11:44:00	7.8	0.68
Vancouver Island	E282969	UPPER ENGLISHMAN RIVER U/S CENTRE FORK CREEK	124.373	49.2268	2010-08-16 14:35:00	7.78	0.72
Vancouver Island	E282970	UPPER SOUTH ENGLISHMAN RIVER D/S CREEK CONFLUENCE	124.275	49.2253	2010-09-14 09:50:00	35.1	3.84
Vancouver Island	E283338	BANON CREEK U/S CHEMAINUS RIVER	123.768	48.9071	2011-11-09 11:15:00	3.34	0.49
Vancouver Island	E283570	CHEMAINUS RIVER @ GRACE ROAD	123.757	48.9039	2011-11-09 10:35:00	5.74	0.74
Vancouver Island	E285669	UPPER CAMERON RIVER	124.623	49.2078	2011-10-18 10:00:00	11	1.1
Vancouver Island	E285669	UPPER CAMERON RIVER	124.623	49.2078	2011-08-16 10:10:00	13.1	1.31
Vancouver Island	E285670	CHEMAINUS RIVER AT MEADE CREEK ML BRIDGE	124.084	48.9233	2011-11-09 12:45:00	5.66	0.65
Vancouver Island	E285671	CHIPMAN CREEK U/S CHEMAINUS RIVER	123.929	48.8456	2011-11-09 12:20:00	5.12	0.69
Vancouver Island	E286930	QUINSAM RIVER @ QRDS1	125.514	49.984	2016-11-10 12:00:00	8.14	1.07
Vancouver Island	E286930	QUINSAM RIVER @ QRDS1	125.514	49.984	2014-11-03	9.4	1.19
Vancouver Island	E286930	QUINSAM RIVER @ QRDS1	125.514	49.984	2013-10-21 09:00:00	10.6	1.26
Vancouver Island	E286930	QUINSAM RIVER @ QRDS1	125.514	49.984	2014-11-12	9.12	1.27
Vancouver Island	E286930	QUINSAM RIVER @ QRDS1	125.514	49.984	2018-08-14	10.7	1.28
Vancouver Island	E286930	QUINSAM RIVER @ QRDS1	125.514	49.984	2018-08-07	11	1.28
Vancouver Island	E286930	QUINSAM RIVER @ QRDS1	125.514	49.984	2015-05-04	11	1.31
Vancouver Island	E286930	QUINSAM RIVER @ QRDS1	125.514	49.984	2018-07-24	11.5	1.31
Vancouver Island	E286930	QUINSAM RIVER @ QRDS1	125.514	49.984	2016-08-29 12:00:00	10.7	1.35
Vancouver Island	E286930	QUINSAM RIVER @ QRDS1	125.514	49.984	2015-04-20	11.4	1.35
Vancouver Island	E286930	QUINSAM RIVER @ QRDS1	125.514	49.984	2016-04-12 12:00:00	11.9	1.35
Vancouver Island	E286930	QUINSAM RIVER @ QRDS1	125.514	49.984	2013-10-28 09:00:00	10.7	1.36
Vancouver Island	E286930	QUINSAM RIVER @ QRDS1	125.514	49.984	2018-08-01	11.1	1.39
Vancouver Island	E286930	QUINSAM RIVER @ QRDS1	125.514	49.984	2016-08-22 12:00:00	11.3	1.39
Vancouver Island	E286930	QUINSAM RIVER @ QRDS1	125.514	49.984	2016-08-11 12:00:00	11.7	1.39
Vancouver Island	E286930	QUINSAM RIVER @ QRDS1	125.514	49.984	2015-04-14	11.3	1.4
Vancouver Island	E286930	QUINSAM RIVER @ QRDS1	125.514	49.984	2016-10-18 12:00:00	9.6	1.41
Vancouver Island	E286930	QUINSAM RIVER @ QRDS1	125.514	49.984	2016-04-28 12:00:00	12.9	1.41
Vancouver Island	E286930	QUINSAM RIVER @ QRDS1	125.514	49.984	2013-10-15 09:00:00	11.2	1.42
Vancouver Island	E286930	QUINSAM RIVER @ QRDS1	125.514	49.984	2016-08-16 12:00:00	11.3	1.42
Vancouver Island	E286930	QUINSAM RIVER @ QRDS1	125.514	49.984	2014-10-15	10.5	1.43
Vancouver Island	E286930	QUINSAM RIVER @ QRDS1	125.514	49.984	2018-04-25	11.6	1.44
Vancouver Island	E286930	QUINSAM RIVER @ QRDS1	125.514	49.984	2014-08-13	12	1.45
Vancouver Island	E286930	QUINSAM RIVER @ QRDS1	125.514	49.984	2015-04-27	12.2	1.46
Vancouver Island	E286930	QUINSAM RIVER @ QRDS1	125.514	49.984	2018-05-01	11.7	1.47
Vancouver Island	E286930	QUINSAM RIVER @ QRDS1	125.514	49.984	2016-10-31 12:00:00	10.2	1.49
Vancouver Island	E286930	QUINSAM RIVER @ QRDS1	125.514	49.984	2015-08-12	11.9	1.51
Vancouver Island	E286930	QUINSAM RIVER @ QRDS1	125.514	49.984	2014-08-20 00:01:00	12.1	1.51
Vancouver Island	E286930	QUINSAM RIVER @ QRDS1	125.514	49.984	2017-08-04	12.6	1.52
Vancouver Island	E286930	QUINSAM RIVER @ QRDS1	125.514	49.984	2015-08-04	11.9	1.53
Vancouver Island	E286930	QUINSAM RIVER @ QRDS1	125.514	49.984	2014-07-23	12.1	1.53
Vancouver Island	E286930	QUINSAM RIVER @ QRDS1	125.514	49.984	2015-08-17 12:00:00	12.2	1.53
Vancouver Island	E286930	QUINSAM RIVER @ QRDS1	125.514	49.984	2017-10-16	10.3	1.54
Vancouver Island	E286930	QUINSAM RIVER @ QRDS1	125.514	49.984	2016-05-03 12:00:00	13.2	1.54
Vancouver Island	E286930	QUINSAM RIVER @ QRDS1	125.514	49.984	2017-08-30	11.7	1.55
Vancouver Island	E286930	QUINSAM RIVER @ QRDS1	125.514	49.984	2013-10-07	11.9	1.55
Vancouver Island	E286930	QUINSAM RIVER @ QRDS1	125.514	49.984	2016-04-19 12:00:00	11.9	1.55
Vancouver Island	E286930	QUINSAM RIVER @ QRDS1	125.514	49.984	2015-09-01	12.4	1.56
Vancouver Island	E286930	QUINSAM RIVER @ QRDS1	125.514	49.984	2017-07-26	12.1	1.57
Vancouver Island	E286930	QUINSAM RIVER @ QRDS1	125.514	49.984	2013-07-29	12.2	1.58
Vancouver Island	E286930	QUINSAM RIVER @ QRDS1	125.514	49.984	2013-07-22	12.2	1.59
Vancouver Island	E286930	QUINSAM RIVER @ QRDS1	125.514	49.984	2017-04-24 12:00:00	12.4	1.59
Vancouver Island	E286930	QUINSAM RIVER @ QRDS1	125.514	49.984	2014-04-07	13.4	1.61
Vancouver Island	E286930	QUINSAM RIVER @ QRDS1	125.514	49.984	2014-07-31	12.5	1.63
Vancouver Island	E286930	QUINSAM RIVER @ QRDS1	125.514	49.984	2017-04-12 12:00:00	11.6	1.65
Vancouver Island	E286930	QUINSAM RIVER @ QRDS1	125.514	49.984	2015-08-24	12.1	1.65
Vancouver Island	E286930	QUINSAM RIVER @ QRDS1	125.514	49.984	2014-04-02	13	1.69
Vancouver Island	E286930	QUINSAM RIVER @ QRDS1	125.514	49.984	2017-05-03 12:00:00	13	1.69
Vancouver Island	E286930	QUINSAM RIVER @ QRDS1	125.514	49.984	2016-05-10 12:00:00	14.2	1.7
Vancouver Island	E286930	QUINSAM RIVER @ QRDS1	125.514	49.984	2014-08-05 11:00:00	12.5	1.71
Vancouver Island	E286930	QUINSAM RIVER @ QRDS1	125.514	49.984	2016-08-04 12:00:00	13.2	1.72
Vancouver Island	E286930	QUINSAM RIVER @ QRDS1	125.514	49.984	2014-04-14	13.6	1.72
Vancouver Island	E286930	QUINSAM RIVER @ QRDS1	125.514	49.984	2016-10-26 12:00:00	11.5	1.73
Vancouver Island	E286930	QUINSAM RIVER @ QRDS1	125.514	49.984	2017-11-06	13.6	1.73
Vancouver Island	E286930	QUINSAM RIVER @ QRDS1	125.514	49.984	2017-10-11	12.8	1.74
Vancouver Island	E286930	QUINSAM RIVER @ QRDS1	125.514	49.984	2014-10-12 12:00:00	13	1.75
Vancouver Island	E286930	QUINSAM RIVER @ QRDS1	125.514	49.984	2014-10-27	12.2	1.77
Vancouver Island	E286930	QUINSAM RIVER @ QRDS1	125.514	49.984	2000-04-11	14	1.81
Vancouver Island	E286930	QUINSAM RIVER @ QRDS1	125.514	49.984	2017-10-30	13.7	1.82
Vancouver Island	E286930	QUINSAM RIVER @ QRDS1	125.514	49.984	2014-04-21	14.6	1.86
Vancouver Island	E286930	QUINSAM RIVER @ QRDS1	125.514	49.984	2015-10-28	14.4	1.89
Vancouver Island	E286930	QUINSAM RIVER @ QRDS1	125.514	49.984	2017-04-04 12:00:00	15.1	1.92
Vancouver Island	E286930	QUINSAM RIVER @ QRDS1	125.514	49.984	2018-05-08	16.5	1.94
Vancouver Island	E286930	QUINSAM RIVER @ QRDS1	125.514	49.984	2015-10-21	16.1	2.03
Vancouver Island	E286930	QUINSAM RIVER @ QRDS1	125.514	49.984	2014-04-28	16.4	2.08
Vancouver Island	E286930	QUINSAM RIVER @ QRDS1	125.514	49.984	2017-10-23	16.5	2.14
Vancouver Island	E286930	QUINSAM RIVER @ QRDS1	125.514	49.984	2015-11-10	16.2	2.15
Vancouver Island	E286930	QUINSAM RIVER @ QRDS1	125.514	49.984	2015-10-14	17.4	2.16
Vancouver Island	E286930	QUINSAM RIVER @ QRDS1	125.514	49.984	2015-11-04	17.9	2.27
Vancouver Island	E286930	QUINSAM RIVER @ QRDS1	125.514	49.984	2014-10-22	20	2.69
Vancouver Island	E290509	COLWOOD CREEK AT MOUTH	123.469	48.4314	2017-10-18 11:15:00	2.09	0.277
Vancouver Island	E290509	COLWOOD CREEK AT MOUTH	123.469	48.4314	2017-11-15 11:35:00	14.1	3.66
Vancouver Island	E290509	COLWOOD CREEK AT MOUTH	123.469	48.4314	2017-10-25 12:00:00	15.4	3.77
Vancouver Island	E290509	COLWOOD CREEK AT MOUTH	123.469	48.4314	2017-11-01 12:30:00	19.8	5.18
Vancouver Island	E290509	COLWOOD CREEK AT MOUTH	123.469	48.4314	2017-11-08 11:45:00	21.3	5.53
Vancouver Island	E290511	COLWOOD CREEK BELOW GLEN LAKE	123.515	48.4353	2017-11-15 10:55:00	22.6	5.94
Vancouver Island	E290511	COLWOOD CREEK BELOW GLEN LAKE	123.515	48.4353	2017-11-01 10:50:00	22	6.01
Vancouver Island	E290511	COLWOOD CREEK BELOW GLEN LAKE	123.515	48.4353	2017-11-08 11:00:00	24.5	6.33
Vancouver Island	E290511	COLWOOD CREEK BELOW GLEN LAKE	123.515	48.4353	2017-10-25 11:10:00	23.5	6.65
Vancouver Island	E290511	COLWOOD CREEK BELOW GLEN LAKE	123.515	48.4353	2017-10-18 09:30:00	27.6	8.11
Vancouver Island	E290512	COLWOOD CREEK DOWNSTREAM GOLF COURSE	123.493	48.4433	2017-10-18 10:10:00	18.5	4.64
Vancouver Island	E290512	COLWOOD CREEK DOWNSTREAM GOLF COURSE	123.493	48.4433	2017-11-15 11:10:00	18.9	4.98
Vancouver Island	E290512	COLWOOD CREEK DOWNSTREAM GOLF COURSE	123.493	48.4433	2017-10-25 11:45:00	23.3	6
Vancouver Island	E290512	COLWOOD CREEK DOWNSTREAM GOLF COURSE	123.493	48.4433	2017-11-01 12:10:00	22.7	6.38
Vancouver Island	E290512	COLWOOD CREEK DOWNSTREAM GOLF COURSE	123.493	48.4433	2017-11-08 11:30:00	24.6	6.52
Vancouver Island	E290513	COLQUITZ CREEK AT MOUTH	123.401	48.4564	2017-10-18 14:00:00	14.8	4.11
Vancouver Island	E290513	COLQUITZ CREEK AT MOUTH	123.401	48.4564	2017-11-15 15:35:00	25.6	7.45
Vancouver Island	E290513	COLQUITZ CREEK AT MOUTH	123.401	48.4564	2017-11-01 15:35:00	35.5	9.76
Vancouver Island	E290513	COLQUITZ CREEK AT MOUTH	123.401	48.4564	2017-11-08 14:20:00	33.2	10.1
Vancouver Island	E290513	COLQUITZ CREEK AT MOUTH	123.401	48.4564	2017-10-25 13:05:00	36.3	10.1
Vancouver Island	E290514	COLQUITZ CREEK D/S SWAN CREEK	123.401	48.4664	2017-11-01 14:00:00	21.2	5.56
Vancouver Island	E290514	COLQUITZ CREEK D/S SWAN CREEK	123.401	48.4664	2017-11-15 13:10:00	21	5.86
Vancouver Island	E290514	COLQUITZ CREEK D/S SWAN CREEK	123.401	48.4664	2017-10-25 14:45:00	24	6.08
Vancouver Island	E290514	COLQUITZ CREEK D/S SWAN CREEK	123.401	48.4664	2017-10-18 12:30:00	25.3	6.38
Vancouver Island	E290514	COLQUITZ CREEK D/S SWAN CREEK	123.401	48.4664	2017-11-08 12:55:00	26.3	7.02
Vancouver Island	E290515	SWAN CREEK U/S COLQUITZ CREEK	123.377	48.4625	2017-10-18 12:05:00	10.1	2.9
Vancouver Island	E290515	SWAN CREEK U/S COLQUITZ CREEK	123.377	48.4625	2017-11-15 15:00:00	30.8	9.38
Vancouver Island	E290515	SWAN CREEK U/S COLQUITZ CREEK	123.377	48.4625	2017-10-25 13:55:00	35.3	10.2
Vancouver Island	E290515	SWAN CREEK U/S COLQUITZ CREEK	123.377	48.4625	2017-11-08 14:50:00	41.6	12.8
Vancouver Island	E290515	SWAN CREEK U/S COLQUITZ CREEK	123.377	48.4625	2017-11-01 13:30:00	44.2	14.6
Vancouver Island	E290516	BLENKINSOP CREEK U/S SWAN LAKE	123.366	48.4639	2017-10-18 13:40:00	5.85	1.1
Vancouver Island	E290516	BLENKINSOP CREEK U/S SWAN LAKE	123.366	48.4639	2017-11-15 14:30:00	46.1	11.1
Vancouver Island	E290516	BLENKINSOP CREEK U/S SWAN LAKE	123.366	48.4639	2017-11-01 15:15:00	53.3	13.7
Vancouver Island	E290516	BLENKINSOP CREEK U/S SWAN LAKE	123.366	48.4639	2017-10-25 16:00:00	60.1	13.7
Vancouver Island	E290516	BLENKINSOP CREEK U/S SWAN LAKE	123.366	48.4639	2017-11-08 14:00:00	64.6	17.3
Vancouver Island	E290517	COLQUITZ CREEK D/S ELK LAKE	123.397	48.5054	2017-11-01 14:35:00	18.4	4.54
Vancouver Island	E290517	COLQUITZ CREEK D/S ELK LAKE	123.397	48.5054	2017-11-15 13:50:00	20	4.75
Vancouver Island	E290517	COLQUITZ CREEK D/S ELK LAKE	123.397	48.5054	2017-10-25 15:30:00	19.7	4.87
Vancouver Island	E290517	COLQUITZ CREEK D/S ELK LAKE	123.397	48.5054	2017-10-18 12:10:00	20.5	4.88
Vancouver Island	E290517	COLQUITZ CREEK D/S ELK LAKE	123.397	48.5054	2017-11-08 13:30:00	20.5	4.98
Vancouver Island	E290518	COLQUITZ CREEK U/S SWAN CREEK	123.401	48.4675	2017-10-18 11:55:00	19.3	5.01
Vancouver Island	E290518	COLQUITZ CREEK U/S SWAN CREEK	123.401	48.4675	2017-11-15 15:10:00	24.7	7.03
Vancouver Island	E290518	COLQUITZ CREEK U/S SWAN CREEK	123.401	48.4675	2017-11-01 13:15:00	31.9	9.09
Vancouver Island	E290518	COLQUITZ CREEK U/S SWAN CREEK	123.401	48.4675	2017-10-25 14:00:00	35	9.43
Vancouver Island	E290518	COLQUITZ CREEK U/S SWAN CREEK	123.401	48.4675	2017-11-08 15:05:00	35.9	10.4
Vancouver Island	E297230	IRON RIVER BACKGROUND - IR1	125.464	49.8923	2016-05-03 12:00:00	7.42	0.477
Vancouver Island	E297230	IRON RIVER BACKGROUND - IR1	125.464	49.8923	2018-05-09	7.71	0.489
Vancouver Island	E297230	IRON RIVER BACKGROUND - IR1	125.464	49.8923	2017-04-24 12:00:00	9.91	0.524
Vancouver Island	E297230	IRON RIVER BACKGROUND - IR1	125.464	49.8923	2016-04-19 12:00:00	8.07	0.526
Vancouver Island	E297230	IRON RIVER BACKGROUND - IR1	125.464	49.8923	2000-04-12	9.36	0.528
Vancouver Island	E297230	IRON RIVER BACKGROUND - IR1	125.464	49.8923	2015-03-26	8.5	0.529
Vancouver Island	E297230	IRON RIVER BACKGROUND - IR1	125.464	49.8923	2018-05-01	9.57	0.545
Vancouver Island	E297230	IRON RIVER BACKGROUND - IR1	125.464	49.8923	2018-01-24	9.47	0.546
Vancouver Island	E297230	IRON RIVER BACKGROUND - IR1	125.464	49.8923	2016-04-12 12:00:00	8.04	0.553
Vancouver Island	E297230	IRON RIVER BACKGROUND - IR1	125.464	49.8923	2018-03-20	8.77	0.553
Vancouver Island	E297230	IRON RIVER BACKGROUND - IR1	125.464	49.8923	2016-05-10 12:00:00	8.03	0.555
Vancouver Island	E297230	IRON RIVER BACKGROUND - IR1	125.464	49.8923	2016-11-10 12:00:00	9.79	0.57
Vancouver Island	E297230	IRON RIVER BACKGROUND - IR1	125.464	49.8923	2017-04-12 12:00:00	10.4	0.576
Vancouver Island	E297230	IRON RIVER BACKGROUND - IR1	125.464	49.8923	2017-05-03 12:00:00	10.4	0.583
[truncated: 4,973 more rows]

## Sheet: Classified as secondary_R Data
OrganismType	OrganismGroup	BC_Resident	Name	SciName	TestLength	Acute_Chronic	EffectLevel	ToxEndpoint	Lethal_Sublethal	Contaminant	CaMgContam	EffectAnion	TimeContam	HardnessEffectConc_mgLasCaCO3	Ca_mgL	Mg_mgL	Ca_mM	Mg_mM	BKGD_Ca_mgL	BKGD_Mg_mgL	BKGD_CaMg_Ratio	BKGD_Hardness_mgLasCaCO3	PercentChange_Ca	PercentChange_Mg	PercentChange_CaMg_Ratio	PercentChange_Hardness	CaMg_Ratio	MgCa_Ratio	Alkalinity_mgLasCaCO3	pH	Temperature_degC	Conductivity_uScm	ConductivityEffectLevel_uScm	Na_mgL	K_mgL	HCO3_mgL	SO4_mgL	Cl_mgL	Reference
Invertebrate(Hydra)	Invert	no	GreenHydra	Hydra_viridissima	96-hr	Chronic	IC10	Growth	Sublethal	MgSO4.7H2O-4-hrPulse	Mg	SO4	time	5313.96	127.684	1213	3.18589	49.9074	0.21	0.72	0.291667	1.1	60802	168372	-63.9098	482987	0.105263	9.5	5.4	6.3	27	21	NA	2.4	NA	NA	NA	NA	Hoganetal.,2013.
Invertebrate(Hydra)	Invert	no	GreenHydra	Hydra_viridissima	96-hr	Chronic	IC50	Growth	Sublethal	MgSO4.7H2O-4-hrPulse	Mg	SO4	time	5918.52	142.211	1351	3.54834	55.5853	0.21	0.72	0.291667	1.1	67719.3	187539	-63.9098	537947	0.105263	9.5	5.4	6.3	27	21	NA	2.4	NA	NA	NA	NA	Hoganetal.,2013.
Invertebrate(Hydra)	Invert	no	GreenHydra	Hydra_viridissima	96-hr	Chronic	IC10	Growth	Sublethal	MgSO4.7H2O-8-hrPulse	Mg	SO4	time	4385.22	105.368	1001	2.62908	41.1849	0.21	0.72	0.291667	1.1	50175.4	138928	-63.9098	398557	0.105263	9.5	5.4	6.3	27	21	NA	2.4	NA	NA	NA	NA	Hoganetal.,2013.
Invertebrate(Hydra)	Invert	no	GreenHydra	Hydra_viridissima	96-hr	Chronic	IC50	Growth	Sublethal	MgSO4.7H2O-8-hrPulse	Mg	SO4	time	4577.98	110	1045	2.74465	42.9953	0.21	0.72	0.291667	1.1	52381	145039	-63.9098	416080	0.105263	9.5	5.4	6.3	27	21	NA	2.4	NA	NA	NA	NA	Hoganetal.,2013.
Invertebrate(Hydra)	Invert	no	GreenHydra	Hydra_viridissima	96-hr	Chronic	IC10	Growth	Sublethal	MgSO4.7H2O-24-hrPulse	Mg	SO4	time	3106.02	74.6316	709	1.86216	29.171	0.21	0.72	0.291667	1.1	35538.8	98372.2	-63.9098	282265	0.105263	9.5	5.4	6.3	27	21	NA	2.4	NA	NA	NA	NA	Hoganetal.,2013.
Invertebrate(Hydra)	Invert	no	GreenHydra	Hydra_viridissima	96-hr	Chronic	IC50	Growth	Sublethal	MgSO4.7H2O-24-hrPulse	Mg	SO4	time	3942.76	94.7368	900	2.36381	37.0294	0.21	0.72	0.291667	1.1	45012.8	124900	-63.9098	358333	0.105263	9.5	5.4	6.3	27	21	NA	2.4	NA	NA	NA	NA	Hoganetal.,2013.
Invertebrate(Hydra)	Invert	no	GreenHydra	Hydra_viridissima	96-hr	Chronic	IC50	Growth	Sublethal	MgSO4.7H2O	Mg	SO4	no	2759.93	66.3158	630	1.65467	25.9206	0.21	0.72	0.291667	1.1	31478.9	87400	-63.9098	250803	0.105263	9.5	5.4	6.3	27	21	NA	2.4	NA	NA	NA	NA	Hoganetal.,2013.
Invertebrate(Cladoceran)	Invert	no	WaterFlea	Moinodaphnia_macleayi	3-brood	Chronic	IC10	Reproduction	Sublethal	MgSO4.7H2O-4-hrPulse	Mg	SO4	time	4455.32	107.053	1017	2.67111	41.8432	0.21	0.72	0.291667	1.1	50877.4	141150	-63.9098	404929	0.105263	9.5	5.4	6.3	27	21	NA	2.4	NA	NA	NA	NA	Hoganetal.,2013.
Invertebrate(Cladoceran)	Invert	no	WaterFlea	Moinodaphnia_macleayi	3-brood	Chronic	IC50	Reproduction	Sublethal	MgSO4.7H2O-4-hrPulse	Mg	SO4	time	6400.41	153.789	1461	3.83725	60.1111	0.21	0.72	0.291667	1.1	73133.1	202817	-63.9098	581755	0.105263	9.5	5.4	6.3	27	21	NA	2.4	NA	NA	NA	NA	Hoganetal.,2013.
Invertebrate(Cladoceran)	Invert	no	WaterFlea	Moinodaphnia_macleayi	3-brood	Chronic	IC10	Reproduction	Sublethal	MgSO4.7H2O-8-hrPulse	Mg	SO4	time	2681.08	64.4211	612	1.60739	25.18	0.21	0.72	0.291667	1.1	30576.7	84900	-63.9098	243634	0.105263	9.5	5.4	6.3	27	21	NA	2.4	NA	NA	NA	NA	Hoganetal.,2013.
Invertebrate(Cladoceran)	Invert	no	WaterFlea	Moinodaphnia_macleayi	3-brood	Chronic	IC50	Reproduction	Sublethal	MgSO4.7H2O-8-hrPulse	Mg	SO4	time	4569.22	109.789	1043	2.7394	42.913	0.21	0.72	0.291667	1.1	52180.7	144761	-63.9098	415283	0.105263	9.5	5.4	6.3	27	21	NA	2.4	NA	NA	NA	NA	Hoganetal.,2013.
Invertebrate(Cladoceran)	Invert	no	WaterFlea	Moinodaphnia_macleayi	3-brood	Chronic	IC10	Reproduction	Sublethal	MgSO4.7H2O-24-hrPulse	Mg	SO4	time	946.262	22.7368	216	0.567315	8.88706	0.21	0.72	0.291667	1.1	10727.1	29900	-63.9098	85923.8	0.105263	9.5	5.4	6.3	27	21	NA	2.4	NA	NA	NA	NA	Hoganetal.,2013.
Invertebrate(Cladoceran)	Invert	no	WaterFlea	Moinodaphnia_macleayi	3-brood	Chronic	IC50	Reproduction	Sublethal	MgSO4.7H2O-24-hrPulse	Mg	SO4	time	2199.18	52.8421	502	1.31848	20.6542	0.21	0.72	0.291667	1.1	25062.9	69622.2	-63.9098	199826	0.105263	9.5	5.4	6.3	27	21	NA	2.4	NA	NA	NA	NA	Hoganetal.,2013.
Invertebrate(Cladoceran)	Invert	no	WaterFlea	Moinodaphnia_macleayi	3-brood	Chronic	IC50	Reproduction	Sublethal	MgSO4.7H2O	Mg	SO4	no	556.367	13.3684	127	0.33356	5.22526	0.21	0.72	0.291667	1.1	6265.91	17538.9	-63.9098	50478.8	0.105263	9.5	5.4	6.3	27	21	NA	2.4	NA	NA	NA	NA	Hoganetal.,2013.
Invertebrate(Cladoceran)	Invert	no	WaterFlea	Moinodaphnia_macleayi	3-brood	Chronic	IC10	Reproduction	Sublethal	MgSO4.7H2O-4-hrPulse	Mg	SO4	time	928.739	22.3158	212	0.556809	8.72249	0.21	0.72	0.291667	1.1	10526.6	29344.4	-63.9098	84330.8	0.105263	9.5	5.4	6.3	27	21	NA	2.4	NA	NA	NA	NA	Hoganetal.,2013.
Invertebrate(Cladoceran)	Invert	no	WaterFlea	Moinodaphnia_macleayi	3-brood	Chronic	IC50	Reproduction	Sublethal	MgSO4.7H2O-4-hrPulse	Mg	SO4	time	1568.34	37.6842	358	0.940272	14.7295	0.21	0.72	0.291667	1.1	17844.9	49622.2	-63.9098	142476	0.105263	9.5	5.4	6.3	27	21	NA	2.4	NA	NA	NA	NA	Hoganetal.,2013.
Invertebrate(Cladoceran)	Invert	no	WaterFlea	Moinodaphnia_macleayi	3-brood	Chronic	IC10	Reproduction	Sublethal	MgSO4.7H2O-8-hrPulse	Mg	SO4	time	271.612	6.52632	62	0.16284	2.55092	0.21	0.72	0.291667	1.1	3007.77	8511.11	-63.9098	24592	0.105263	9.5	5.4	6.3	27	21	NA	2.4	NA	NA	NA	NA	Hoganetal.,2013.
Invertebrate(Cladoceran)	Invert	no	WaterFlea	Moinodaphnia_macleayi	3-brood	Chronic	IC50	Reproduction	Sublethal	MgSO4.7H2O-8-hrPulse	Mg	SO4	time	1296.73	31.1579	296	0.777431	12.1786	0.21	0.72	0.291667	1.1	14737.1	41011.1	-63.9098	117784	0.105263	9.5	5.4	6.3	27	21	NA	2.4	NA	NA	NA	NA	Hoganetal.,2013.
Invertebrate(Cladoceran)	Invert	no	WaterFlea	Moinodaphnia_macleayi	3-brood	Chronic	IC10	Reproduction	Sublethal	MgSO4.7H2O-24-hrPulse	Mg	SO4	time	560.748	13.4737	128	0.336187	5.26641	0.21	0.72	0.291667	1.1	6316.04	17677.8	-63.9098	50877.1	0.105263	9.5	5.4	6.3	27	21	NA	2.4	NA	NA	NA	NA	Hoganetal.,2013.
Invertebrate(Cladoceran)	Invert	no	WaterFlea	Moinodaphnia_macleayi	3-brood	Chronic	IC50	Reproduction	Sublethal	MgSO4.7H2O-24-hrPulse	Mg	SO4	time	1082.07	26	247	0.648735	10.1625	0.21	0.72	0.291667	1.1	12281	34205.6	-63.9098	98269.8	0.105263	9.5	5.4	6.3	27	21	NA	2.4	NA	NA	NA	NA	Hoganetal.,2013.
Algae	Algae/AquaticPlant	yes	GreenAlgae	Chlorella_sp.	72-hr	Chronic	IC10	Growth	Sublethal	MgCl2-4-hrPulse	Mg	Cl	time	26083.5	626.737	5954	15.6379	244.97	0.21	0.72	0.291667	1.1	298346	826844	-63.9098	2.37113e+06	0.105263	9.5	5.4	6.3	29	21	NA	2.4	NA	NA	0.29	NA	Hoganetal.,2013.
Algae	Algae/AquaticPlant	yes	GreenAlgae	Chlorella_sp.	72-hr	Chronic	IC50	Growth	Sublethal	MgCl2-4-hrPulse	Mg	Cl	time	28475.5	684.211	6500	17.072	267.435	0.21	0.72	0.291667	1.1	325715	902678	-63.9098	2.58858e+06	0.105263	9.5	5.4	6.3	29	21	NA	2.4	NA	NA	0.29	NA	Hoganetal.,2013.
Algae	Algae/AquaticPlant	yes	GreenAlgae	Chlorella_sp.	72-hr	Chronic	IC10	Growth	Sublethal	MgCl2-8-hrPulse	Mg	Cl	time	24620.3	591.579	5620	14.7607	231.228	0.21	0.72	0.291667	1.1	281604	780456	-63.9098	2.23811e+06	0.105263	9.5	5.4	6.3	29	21	NA	2.4	NA	NA	0.29	NA	Hoganetal.,2013.
Algae	Algae/AquaticPlant	yes	GreenAlgae	Chlorella_sp.	72-hr	Chronic	IC50	Growth	Sublethal	MgCl2-8-hrPulse	Mg	Cl	time	28589.4	686.947	6526	17.1403	268.504	0.21	0.72	0.291667	1.1	327018	906289	-63.9098	2.59893e+06	0.105263	9.5	5.4	6.3	29	21	NA	2.4	NA	NA	0.29	NA	Hoganetal.,2013.
Algae	Algae/AquaticPlant	yes	GreenAlgae	Chlorella_sp.	72-hr	Chronic	IC10	Growth	Sublethal	MgCl2-24-hrPulse	Mg	Cl	time	16997.7	408.421	3880	10.1907	159.638	0.21	0.72	0.291667	1.1	194386	538789	-63.9098	1.54514e+06	0.105263	9.5	5.4	6.3	29	21	NA	2.4	NA	NA	0.29	NA	Hoganetal.,2013.
Algae	Algae/AquaticPlant	yes	GreenAlgae	Chlorella_sp.	72-hr	Chronic	IC50	Growth	Sublethal	MgCl2-24-hrPulse	Mg	Cl	time	29921.2	718.947	6830	17.9387	281.012	0.21	0.72	0.291667	1.1	342256	948511	-63.9098	2.72e+06	0.105263	9.5	5.4	6.3	29	21	NA	2.4	NA	NA	0.29	NA	Hoganetal.,2013.
Algae	Algae/AquaticPlant	yes	GreenAlgae	Chlorella_sp.	72-hr	Chronic	IC50	Growth	Sublethal	MgSO4.7H2O	Mg	SO4	no	26407.7	634.526	6028	15.8323	248.015	0.21	0.72	0.291667	1.1	302055	837122	-63.9098	2.4006e+06	0.105263	9.5	5.4	6.3	29	21	NA	2.4	NA	NA	NA	NA	Hoganetal.,2013.
AquaticPlant	Algae/AquaticPlant	no	LesserDuckweed	Lemna_aequinoctialis	96-hr	Chronic	IC10	Growth	Sublethal	MgSO4.7H2O-4-hrPulse	Mg	SO4	time	17654.8	424.211	4030	10.5846	165.81	0.21	0.72	0.291667	1.1	201905	559622	-63.9098	1.60488e+06	0.105263	9.5	5.4	6.3	29	21	NA	2.4	NA	NA	NA	NA	Hoganetal.,2013.
AquaticPlant	Algae/AquaticPlant	no	LesserDuckweed	Lemna_aequinoctialis	96-hr	Chronic	IC10	Growth	Sublethal	MgSO4.7H2O-8-hrPulse	Mg	SO4	time	6549.36	157.368	1495	3.92655	61.51	0.21	0.72	0.291667	1.1	74837.3	207539	-63.9098	595296	0.105263	9.5	5.4	6.3	29	21	NA	2.4	NA	NA	NA	NA	Hoganetal.,2013.
AquaticPlant	Algae/AquaticPlant	no	LesserDuckweed	Lemna_aequinoctialis	96-hr	Chronic	IC50	Growth	Sublethal	MgSO4.7H2O-8-hrPulse	Mg	SO4	time	16564	398	3781	9.93064	155.565	0.21	0.72	0.291667	1.1	189424	525039	-63.9098	1.50571e+06	0.105263	9.5	5.4	6.3	29	21	NA	2.4	NA	NA	NA	NA	Hoganetal.,2013.
AquaticPlant	Algae/AquaticPlant	no	LesserDuckweed	Lemna_aequinoctialis	96-hr	Chronic	IC10	Growth	Sublethal	MgSO4.7H2O-24-hrPulse	Mg	SO4	time	350.467	8.42105	80	0.210117	3.2915	0.21	0.72	0.291667	1.1	3910.03	11011.1	-63.9098	31760.7	0.105263	9.5	5.4	6.3	29	21	NA	2.4	NA	NA	NA	NA	Hoganetal.,2013.
AquaticPlant	Algae/AquaticPlant	no	LesserDuckweed	Lemna_aequinoctialis	96-hr	Chronic	IC50	Growth	Sublethal	MgSO4.7H2O-24-hrPulse	Mg	SO4	time	12489.8	300.105	2851	7.48803	117.301	0.21	0.72	0.291667	1.1	142807	395872	-63.9098	1.13533e+06	0.105263	9.5	5.4	6.3	29	21	NA	2.4	NA	NA	NA	NA	Hoganetal.,2013.
AquaticPlant	Algae/AquaticPlant	no	LesserDuckweed	Lemna_aequinoctialis	96-hr	Chronic	IC50	Growth	Sublethal	MgSO4.7H2O	Mg	SO4	no	6426.7	154.421	1467	3.85301	60.358	0.21	0.72	0.291667	1.1	73433.8	203650	-63.9098	584145	0.105263	9.5	5.4	6.3	29	21	NA	2.4	NA	NA	NA	NA	Hoganetal.,2013.
Invertebrate(Gastropod)	Invert	no	PulmonateSnail	Amerianna_cumingi	96-hr	Acute	IC10	Reproduction	Sublethal	MgSO4.7H2O-4-hrPulse	Mg	SO4	time	13278.3	319.053	3031	7.96079	124.707	0.21	0.72	0.291667	1.1	151830	420872	-63.9098	1.20702e+06	0.105263	9.5	5.4	6.3	30	21	NA	2.4	NA	NA	NA	NA	Hoganetal.,2013.
Invertebrate(Gastropod)	Invert	no	PulmonateSnail	Amerianna_cumingi	96-hr	Acute	IC10	Reproduction	Sublethal	MgSO4.7H2O-8-hrPulse	Mg	SO4	time	1695.39	40.7368	387	1.01644	15.9226	0.21	0.72	0.291667	1.1	19298.5	53650	-63.9098	154026	0.105263	9.5	5.4	6.3	30	21	NA	2.4	NA	NA	NA	NA	Hoganetal.,2013.
Invertebrate(Gastropod)	Invert	no	PulmonateSnail	Amerianna_cumingi	96-hr	Acute	IC50	Reproduction	Sublethal	MgSO4.7H2O-8-hrPulse	Mg	SO4	time	12016.6	288.737	2743	7.20437	112.857	0.21	0.72	0.291667	1.1	137394	380872	-63.9098	1.09232e+06	0.105263	9.5	5.4	6.3	30	21	NA	2.4	NA	NA	NA	NA	Hoganetal.,2013.
Invertebrate(Gastropod)	Invert	no	PulmonateSnail	Amerianna_cumingi	96-hr	Acute	IC10	Reproduction	Sublethal	MgSO4.7H2O-24-hrPulse	Mg	SO4	time	1318.63	31.6842	301	0.790564	12.3843	0.21	0.72	0.291667	1.1	14987.7	41705.6	-63.9098	119776	0.105263	9.5	5.4	6.3	30	21	NA	2.4	NA	NA	NA	NA	Hoganetal.,2013.
Invertebrate(Gastropod)	Invert	no	PulmonateSnail	Amerianna_cumingi	96-hr	Acute	IC50	Reproduction	Sublethal	MgSO4.7H2O-24-hrPulse	Mg	SO4	time	8485.69	203.895	1937	5.08745	79.6955	0.21	0.72	0.291667	1.1	96992.7	268928	-63.9098	771326	0.105263	9.5	5.4	6.3	30	21	NA	2.4	NA	NA	NA	NA	Hoganetal.,2013.
Invertebrate(Gastropod)	Invert	no	PulmonateSnail	Amerianna_cumingi	96-hr	Acute	IC50	Reproduction	Sublethal	MgSO4.7H2O	Mg	SO4	no	324.182	7.78947	74	0.194358	3.04464	0.21	0.72	0.291667	1.1	3609.27	10177.8	-63.9098	29371.1	0.105263	9.5	5.4	6.3	30	21	NA	2.4	NA	NA	NA	NA	Hoganetal.,2013.
Fish(WarmWater)	Fish	no	NorthernTroutGudgeon	Mogurnda_mogurnda	96-hr	Acute	LC05	Survival	Lethal	MgSO4.7H2O	Mg	SO4	no	50.1651	0.3	12	0.0074854	0.493726	0.3	0.8	0.375	4.5	0	1400	-93.3333	1014.78	0.025	40	6	6.3	27	17	NA	1.3	NA	NA	0.4	2.4	VanDametal.,2010.
Fish(WarmWater)	Fish	no	NorthernTroutGudgeon	Mogurnda_mogurnda	96-hr	Acute	LC50	Survival	Lethal	MgSO4.7H2O	Mg	SO4	no	165.469	0.3	40	0.0074854	1.64575	0.3	0.8	0.375	4.5	0	4900	-98	3577.09	0.0075	133.333	6	6.3	27	17	NA	1.3	NA	NA	0.4	2.4	VanDametal.,2010.
Fish(WarmWater)	Fish	no	NorthernTroutGudgeon	Mogurnda_mogurnda	96-hr	Acute	LC05	Survival	Lethal	MgSO4.7H2O	Mg	SO4	no	17600	445.333	4008	11.1117	164.904	0.3	0.8	0.375	4.5	148344	500900	-70.3704	391011	0.111111	9	6	6.3	27	17	NA	1.3	NA	NA	0.4	2.4	VanDametal.,2010.
Fish(WarmWater)	Fish	no	NorthernTroutGudgeon	Mogurnda_mogurnda	96-hr	Acute	LC50	Survival	Lethal	MgSO4.7H2O	Mg	SO4	no	17800	450	4054	11.2281	166.797	0.3	0.8	0.375	4.5	149900	506650	-70.3704	395456	0.111111	9.00889	6	6.3	27	17	NA	1.3	NA	NA	0.4	2.4	VanDametal.,2010.
Invertebrate(Hydra)	Invert	no	GreenHydra	Hydra_viridissima	96-hr	Chronic	IC10	PopulationGrowth	Sublethal	MgSO4.7H2O	Mg	SO4	no	8	0.3	1.8	0.0074854	0.0740588	0.3	0.8	0.375	4.5	0	125	-55.5556	77.7778	0.166667	6	6	6.3	27	17	NA	1.3	NA	NA	0.4	2.4	VanDametal.,2010.
Invertebrate(Hydra)	Invert	no	GreenHydra	Hydra_viridissima	96-hr	Chronic	IC50	PopulationGrowth	Sublethal	MgSO4.7H2O	Mg	SO4	no	46	0.3	11	0.0074854	0.452582	0.3	0.8	0.375	4.5	0	1275	-92.7273	922.222	0.0272727	36.6667	6	6.3	27	17	NA	1.3	NA	NA	0.4	2.4	VanDametal.,2010.
Invertebrate(Hydra)	Invert	no	GreenHydra	Hydra_viridissima	96-hr	Chronic	IC10	PopulationGrowth	Sublethal	MgSO4.7H2O	Mg	SO4	no	1080	27	246	0.673686	10.1214	0.3	0.8	0.375	4.5	8900	30650	-70.3704	23900	0.111111	9.11111	6	6.3	27	17	NA	1.3	NA	NA	0.4	2.4	VanDametal.,2010.
Invertebrate(Hydra)	Invert	no	GreenHydra	Hydra_viridissima	96-hr	Chronic	IC50	PopulationGrowth	Sublethal	MgSO4.7H2O	Mg	SO4	no	3130	79	713	1.97116	29.3355	0.3	0.8	0.375	4.5	26233.3	89025	-70.3704	69455.6	0.111111	9.02532	6	6.3	27	17	NA	1.3	NA	NA	0.4	2.4	VanDametal.,2010.
Invertebrate(Hydra)	Invert	no	GreenHydra	Hydra_viridissima	96-hr	Chronic	IC50	PopulationGrowth	Sublethal	MgCl2.6H2O	Mg	Cl	no	112	0.3	27	0.0074854	1.11088	0.3	0.8	0.375	4.5	0	3275	-97.3333	2388.89	0.01	90	6	6.3	27	17	NA	1.3	NA	NA	0.4	2.4	VanDametal.,2010.
Invertebrate(Cladoceran)	Invert	no	WaterFlea	Moinodaphnia_macleayi	3-brood	Chronic	IC10	Reproduction	Sublethal	MgSO4.7H2O	Mg	SO4	no	149	0.3	36	0.0074854	1.48118	0.3	0.8	0.375	4.5	0	4400	-97.8667	3211.11	0.008	120	6	6.3	27	17	NA	1.3	NA	NA	0.4	2.4	VanDametal.,2010.
Invertebrate(Cladoceran)	Invert	no	WaterFlea	Moinodaphnia_macleayi	3-brood	Chronic	IC50	Reproduction	Sublethal	MgSO4.7H2O	Mg	SO4	no	260	0.3	63	0.0074854	2.59206	0.3	0.8	0.375	4.5	0	7775	-98.6667	5677.78	0.005	210	6	6.3	27	17	NA	1.3	NA	NA	0.4	2.4	VanDametal.,2010.
Invertebrate(Cladoceran)	Invert	no	WaterFlea	Moinodaphnia_macleayi	3-brood	Chronic	IC10	Reproduction	Sublethal	MgSO4.7H2O	Mg	SO4	no	171	4	39	0.0998054	1.60461	0.3	0.8	0.375	4.5	1233.33	4775	-70.3704	3700	0.111111	9.75	6	6.3	27	17	NA	1.3	NA	NA	0.4	2.4	VanDametal.,2010.
Invertebrate(Cladoceran)	Invert	no	WaterFlea	Moinodaphnia_macleayi	3-brood	Chronic	IC50	Reproduction	Sublethal	MgSO4.7H2O	Mg	SO4	no	536	14	122	0.349319	5.01954	0.3	0.8	0.375	4.5	4566.67	15150	-70.3704	11811.1	0.111111	8.71429	6	6.3	27	17	NA	1.3	NA	NA	0.4	2.4	VanDametal.,2010.
Algae	Algae/AquaticPlant	yes	GreenAlgae	Chlorella_sp.	72-hr	Chronic	IC50	Growth	Sublethal	MgSO4.7H2O	Mg	SO4	no	5000	0.3	1215	0.0074854	49.9897	0.3	0.8	0.375	4.5	0	151775	-99.9467	111011	0.0002	4050	6	6.3	29	17	NA	1.3	NA	NA	0.4	2.4	VanDametal.,2010.
Algae	Algae/AquaticPlant	yes	GreenAlgae	Chlorella_sp.	72-hr	Chronic	IC10	Growth	Sublethal	MgSO4.7H2O	Mg	SO4	no	178	0.3	43	0.0074854	1.76918	0.3	0.8	0.375	4.5	0	5275	-98.1333	3855.56	0.007	143.333	6	6.3	29	17	NA	1.3	NA	NA	0.4	2.4	VanDametal.,2010.
Algae	Algae/AquaticPlant	yes	GreenAlgae	Chlorella_sp.	72-hr	Chronic	IC50	Growth	Sublethal	MgSO4.7H2O	Mg	SO4	no	15100	382	3435	9.53141	141.329	0.3	0.8	0.375	4.5	127233	429275	-70.3704	335456	0.111111	8.99215	6	6.3	29	17	NA	1.3	NA	NA	0.4	2.4	VanDametal.,2010.
Algae	Algae/AquaticPlant	yes	GreenAlgae	Chlorella_sp.	72-hr	Chronic	IC10	Growth	Sublethal	MgSO4.7H2O	Mg	SO4	no	3600	91	818	2.27057	33.6556	0.3	0.8	0.375	4.5	30233.3	102150	-70.3704	79900	0.111111	8.98901	6	6.3	29	17	NA	1.3	NA	NA	0.4	2.4	VanDametal.,2010.
AquaticPlant	Algae/AquaticPlant	no	LesserDuckweed	Lemna_aequinoctialis	96-hr	Chronic	IC10	Growth	Sublethal	MgSO4.7H2O	Mg	SO4	no	9	0.3	1.9	0.0074854	0.0781732	0.3	0.8	0.375	4.5	0	137.5	-57.3333	100	0.16	6.33333	6	6.3	29	17	NA	1.3	NA	NA	0.4	2.4	VanDametal.,2010.
AquaticPlant	Algae/AquaticPlant	no	LesserDuckweed	Lemna_aequinoctialis	96-hr	Chronic	IC50	Growth	Sublethal	MgSO4.7H2O	Mg	SO4	no	19	0.3	4.4	0.0074854	0.181033	0.3	0.8	0.375	4.5	0	450	-81.3333	322.222	0.07	14.6667	6	6.3	29	17	NA	1.3	NA	NA	0.4	2.4	VanDametal.,2010.
AquaticPlant	Algae/AquaticPlant	no	LesserDuckweed	Lemna_aequinoctialis	96-hr	Chronic	IC10	Growth	Sublethal	MgSO4.7H2O	Mg	SO4	no	158	4	36	0.0998054	1.48118	0.3	0.8	0.375	4.5	1233.33	4400	-70.3704	3411.11	0.111111	9	6	6.3	29	17	NA	1.3	NA	NA	0.4	2.4	VanDametal.,2010.
AquaticPlant	Algae/AquaticPlant	no	LesserDuckweed	Lemna_aequinoctialis	96-hr	Chronic	IC50	Growth	Sublethal	MgSO4.7H2O	Mg	SO4	no	2770	70	629	1.74659	25.8794	0.3	0.8	0.375	4.5	23233.3	78525	-70.3704	61455.6	0.111111	8.98571	6	6.3	29	17	NA	1.3	NA	NA	0.4	2.4	VanDametal.,2010.
AquaticPlant	Algae/AquaticPlant	no	LesserDuckweed	Lemna_aequinoctialis	96-hr	Chronic	IC50	Growth	Sublethal	MgCl2.6H2O	Mg	Cl	no	29	0.3	6.8	0.0074854	0.279778	0.3	0.8	0.375	4.5	0	750	-89.3333	544.444	0.04	22.6667	6	6.3	29	17	NA	1.3	NA	NA	0.4	2.4	VanDametal.,2010.
Invertebrate(Gastropod)	Invert	no	PulmonateSnail	Amerianna_cumingi	96-hr	Acute	IC10	Reproduction	Sublethal	MgSO4.7H2O	Mg	SO4	no	19	0.3	4.5	0.0074854	0.185147	0.3	0.8	0.375	4.5	0	462.5	-81.3333	322.222	0.07	15	6	6.3	30	17	NA	1.3	NA	NA	0.4	2.4	VanDametal.,2010.
Invertebrate(Gastropod)	Invert	no	PulmonateSnail	Amerianna_cumingi	96-hr	Acute	IC50	Reproduction	Sublethal	MgSO4.7H2O	Mg	SO4	no	54	0.3	13	0.0074854	0.534869	0.3	0.8	0.375	4.5	0	1525	-94.6667	1100	0.02	43.3333	6	6.3	30	17	NA	1.3	NA	NA	0.4	2.4	VanDametal.,2010.
Invertebrate(Gastropod)	Invert	no	PulmonateSnail	Amerianna_cumingi	96-hr	Acute	IC10	Reproduction	Sublethal	MgSO4.7H2O	Mg	SO4	no	25	1	5.6	0.0249513	0.230405	0.3	0.8	0.375	4.0435	233.333	600	-70.3704	518.276	0.111111	5.6	6	6.3	30	17	NA	1.3	NA	NA	0.4	2.4	VanDametal.,2010.
Invertebrate(Gastropod)	Invert	no	PulmonateSnail	Amerianna_cumingi	96-hr	Acute	IC50	Reproduction	Sublethal	MgSO4.7H2O	Mg	SO4	no	422	11	96	0.274465	3.9498	0.3	0.8	0.375	4.0435	3566.67	11900	-70.3704	10336.5	0.111111	8.72727	6	6.3	30	17	NA	1.3	NA	NA	0.4	2.4	VanDametal.,2010.
Invertebrate(Gastropod)	Invert	no	PulmonateSnail	Amerianna_cumingi	96-hr	Acute	IC50	Reproduction	Sublethal	MgCl2.6H2O	Mg	Cl	no	83	0.3	20	0.0074854	0.822876	0.3	0.8	0.375	4.0435	0	2400	-94.6667	1952.68	0.02	66.6667	6	6.3	30	17	NA	1.3	NA	NA	0.4	2.4	VanDametal.,2010.
Invertebrate(Cladoceran)	Invert	yes	WaterFlea	Daphnia_magna	3-wk	Chronic	LC50	Mortality	Lethal	CaCl2.2H2O	Ca	Cl	no	871.067	343.695	3.123	8.57565	0.128492	13.695	3.123	4.38521	45.3	2409.64	0	2409.64	1822.89	110.053	0.00908654	42.3	7.74	18	NA	NA	1.13	0.534	NA	NA	1.217	BiesingerandChristensen,1972.
Invertebrate(Cladoceran)	Invert	yes	WaterFlea	Daphnia_magna	3-wk	Chronic	IC50	Reproduction	Sublethal	CaCl2.2H2O	Ca	Cl	no	596.397	233.695	3.123	5.831	0.128492	13.695	3.123	4.38521	45.3	1606.43	0	1606.43	1216.55	74.8303	0.0133636	42.3	7.74	18	NA	NA	1.13	0.534	NA	NA	1.217	BiesingerandChristensen,1972.
Invertebrate(Cladoceran)	Invert	yes	WaterFlea	Daphnia_magna	3-wk	Chronic	IC16	Reproduction	Sublethal	CaCl2.2H2O	Ca	Cl	no	336.709	129.695	3.123	3.23606	0.128492	13.695	3.123	4.38521	45.3	847.024	0	847.024	643.287	41.529	0.0240796	42.3	7.74	18	NA	NA	1.13	0.534	NA	NA	1.217	BiesingerandChristensen,1972.
Invertebrate(Cladoceran)	Invert	yes	WaterFlea	Daphnia_magna	3-wk	Chronic	LC50	Mortality	Lethal	MgCl2.6H2O	Mg	Cl	no	829.477	13.695	193.123	0.341709	7.94581	13.695	3.123	4.38521	45.3	0	6083.89	-98.3829	1731.07	0.0709134	14.1017	42.3	7.74	18	NA	NA	1.13	0.534	NA	NA	1.217	BiesingerandChristensen,1972.
Invertebrate(Cladoceran)	Invert	yes	WaterFlea	Daphnia_magna	3-wk	Chronic	IC50	Reproduction	Sublethal	MgCl2.6H2O	Mg	Cl	no	561.807	13.695	128.123	0.341709	5.27147	13.695	3.123	4.38521	45.3	0	4002.56	-97.5625	1140.19	0.106889	9.35546	42.3	7.74	18	NA	NA	1.13	0.534	NA	NA	1.217	BiesingerandChristensen,1972.
Invertebrate(Cladoceran)	Invert	yes	WaterFlea	Daphnia_magna	3-wk	Chronic	IC16	Reproduction	Sublethal	MgCl2.6H2O	Mg	Cl	no	384.733	13.695	85.123	0.341709	3.50228	13.695	3.123	4.38521	45.3	0	2625.68	-96.3312	749.3	0.160885	6.21563	42.3	7.74	18	NA	NA	1.13	0.534	NA	NA	1.217	BiesingerandChristensen,1972.
Invertebrate(Cladoceran)	Invert	yes	WaterFlea	Daphnia_magna	3-wk	Chronic	IC16	Reproduction	Sublethal	MgCl2.6H2O(WithFood)	Mg	Cl	no	384.733	13.695	85.123	0.341709	3.50228	13.695	3.123	4.38521	45.3	0	2625.68	-96.3312	749.3	0.160885	6.21563	42.3	7.74	18	NA	NA	1.13	0.534	NA	NA	1.217	BiesingerandChristensen,1972.
Invertebrate(Cladoceran)	Invert	yes	WaterFlea	Daphnia_magna	3-wk	Chronic	IC16	Reproduction	Sublethal	CaCl2.2H2O(WithFood)	Ca	Cl	no	336.709	129.695	3.123	3.23606	0.128492	13.695	3.123	4.38521	45.3	847.024	0	847.024	643.287	41.529	0.0240796	42.3	7.74	18	NA	NA	1.13	0.534	NA	NA	1.217	BiesingerandChristensen,1972.
Fish(WarmWater)	Fish	yes	FatheadMinnow	Pimephales_promelas	96-hr	Acute	LC50	Mortality	Lethal	CaCl2	Ca	Cl	no	4259	1686	12	42.068	0.493726	14	12	1.16667	84.374	11942.9	0	11942.9	4947.76	140.5	0.007	NA	8.25	25	NA	NA	26.3	2.1	69.7	81.4	2959.9	Mountetal.,1997.
Fish(WarmWater)	Fish	yes	FatheadMinnow	Pimephales_promelas	96-hr	Acute	LC50	Mortality	Lethal	MgCl2	Mg	Cl	no	2312	14	553	0.349319	22.7525	14	12	1.16667	84.374	0	4508.33	-97.8571	2640.18	0.025	39.5	NA	8.25	25	NA	NA	26.3	2.1	69.7	81.4	1580.9	Mountetal.,1997.
Fish(WarmWater)	Fish	yes	FatheadMinnow	Pimephales_promelas	96-hr	Acute	LC50	Mortality	Lethal	MgSO4	Mg	SO4	no	2428	14	581	0.349319	23.9045	14	12	1.16667	84.374	0	4741.67	-97.9429	2777.66	0.024	41.5	NA	8.25	25	NA	NA	26.3	2.1	69.7	2332.4	1.9	Mountetal.,1997.
Fish(WarmWater)	Fish	yes	FatheadMinnow	Pimephales_promelas	96-hr	Acute	LC50	Mortality	Lethal	MgCl2/MgSO4	Mg	Cl,SO4	no	2629	14	630	0.349319	25.9206	14	12	1.16667	84.374	0	5150	-98.1143	3015.89	0.022	45	NA	8.25	25	NA	NA	26.3	2.1	69.7	1525.4	739.9	Mountetal.,1997.
Invertebrate(Cladoceran)	Invert	yes	WaterFlea	Ceriodaphnia_dubia	48-hr	Acute	LC50	Mortality	Lethal	CaCl2/CaSO4	Ca	Cl,SO4	no	2751	1082	12	26.9974	0.493726	14	12	1.16667	84.374	7628.57	0	7631.43	3160.48	90.2	0.011	NA	8.25	25	NA	NA	26.3	2.1	69.7	435.4	1629.9	Mountetal.,1997.
Invertebrate(Cladoceran)	Invert	yes	WaterFlea	Ceriodaphnia_dubia	48-hr	Acute	LC50	Mortality	Lethal	CaCl2/MgCl2	Ca,Mg	Cl	no	2623	483	344	12.0515	14.1535	14	12	1.16667	84.374	3350	2766.67	20	3008.78	1.4	0.712	NA	8.25	25	NA	NA	26.3	2.1	69.7	81.4	1800.9	Mountetal.,1997.
Invertebrate(Cladoceran)	Invert	yes	WaterFlea	Ceriodaphnia_dubia	48-hr	Acute	LC50	Mortality	Lethal	CaCl2	Ca	Cl	no	1735	675	12	16.8422	0.493726	14	12	1.16667	84.374	4721.43	0	4725.71	1956.32	56.3	0.018	NA	8.25	25	NA	NA	26.3	2.1	69.7	81.4	1170.9	Mountetal.,1997.
Invertebrate(Cladoceran)	Invert	yes	WaterFlea	Ceriodaphnia_dubia	48-hr	Acute	LC50	Mortality	Lethal	MgCl2	Mg	Cl	no	1011	14	237	0.349319	9.75108	14	12	1.16667	84.374	0	1875	-94.9429	1098.24	0.059	16.9	NA	8.25	25	NA	NA	26.3	2.1	69.7	81.4	656.9	Mountetal.,1997.
Invertebrate(Cladoceran)	Invert	yes	WaterFlea	Ceriodaphnia_dubia	48-hr	Acute	LC50	Mortality	Lethal	MgCl2/MgSO4	Mg	Cl,SO4	no	1489	14	353	0.349319	14.5238	14	12	1.16667	84.374	0	2841.67	-96.5714	1664.76	0.04	25.2	NA	8.25	25	NA	NA	26.3	2.1	69.7	676.4	556.9	Mountetal.,1997.
Invertebrate(Cladoceran)	Invert	yes	WaterFlea	Ceriodaphnia_dubia	48-hr	Acute	LC50	Mortality	Lethal	MgSO4	Mg	SO4	no	1555	14	369	0.349319	15.1821	14	12	1.16667	84.374	0	2975	-96.7429	1742.98	0.038	26.4	NA	8.25	25	NA	NA	26.3	2.1	69.7	1494.4	1.9	Mountetal.,1997.
Invertebrate(Cladoceran)	Invert	yes	WaterFlea	Daphnia_magna	48-hr	Acute	LC50	Mortality	Lethal	MgCl2	Mg	Cl	no	1484	14	352	0.349319	14.4826	14	12	1.16667	84.374	0	2833.33	-96.5714	1658.84	0.04	25.14	NA	8.25	20	NA	NA	26.3	2.1	69.7	81.4	991.9	Mountetal.,1997.
Invertebrate(Cladoceran)	Invert	yes	WaterFlea	Daphnia_magna	48-hr	Acute	LC50	Mortality	Lethal	CaCl2	Ca	Cl	no	2581	1014	12	25.3007	0.493726	14	12	1.16667	84.374	7142.86	0	7142.86	2959	84.5	0.012	NA	8.25	20	NA	NA	26.3	2.1	69.7	81.4	1771.9	Mountetal.,1997.
Invertebrate(Cladoceran)	Invert	yes	WaterFlea	Daphnia_magna	48-hr	Acute	LC50	Mortality	Lethal	MgSO4	Mg	SO4	no	1600	14	380	0.349319	15.6346	14	12	1.16667	84.374	0	3066.67	-96.8286	1796.32	0.037	27.1	NA	8.25	20	NA	NA	26.3	2.1	69.7	1533.4	1.9	Mountetal.,1997.
Invertebrate(Cladoceran)	Invert	yes	WaterFlea	Daphnia_magna	48-hr	Acute	LC50	Mortality	Lethal	CaCl2/CaSO4	Ca	Cl,SO4	no	2641	1038	12	25.8995	0.493726	14	12	1.16667	84.374	7314.29	0	7314.29	3030.11	86.5	0.012	NA	8.25	20	NA	NA	26.3	2.1	69.7	515.4	1493.9	Mountetal.,1997.
Invertebrate(Cladoceran)	Invert	yes	WaterFlea	Daphnia_magna	48-hr	Acute	LC50	Mortality	Lethal	MgCl2/MgSO4	Mg	Cl,SO4	no	1456	14	345	0.349319	14.1946	14	12	1.16667	84.374	0	2775	-96.4857	1625.65	0.041	24.6	NA	8.25	20	NA	NA	26.3	2.1	69.7	859.4	399.9	Mountetal.,1997.
Fish(WarmWater)	Fish	no	SilverCatfish	Rhamdia_quelen	36-hr	Acute	LOEC	Mortality	Lethal	CaCl2,Hardness	Ca	Cl	no	161	62.94	0.95	1.57044	0.0390866	5.2	0.95	5.47368	16.8965	1110.38	0	1111.25	852.86	66.3	0.0150937	58	8.05	23.5	NA	NA	NA	NA	NA	NA	NA	Silvaetal.,2003.
Fish(WarmWater)	Fish	no	SilverCatfish	Rhamdia_quelen	84-hr	Acute	LOEC	Mortality	Lethal	CaCl2,Hardness	Ca	Cl	no	161	62.94	0.95	1.57044	0.0390866	5.2	0.95	5.47368	16.8965	1110.38	0	1111.25	852.86	66.3	0.0150937	58	8.05	23.5	NA	NA	NA	NA	NA	NA	NA	Silvaetal.,2003.
Fish(WarmWater)	Fish	no	SilverCatfish	Rhamdia_quelen	36-hr	Acute	NOEC	Mortality	Lethal	CaCl2,Hardness	Ca	Cl	no	66	24.95	0.95	0.622536	0.0390866	5.2	0.95	5.47368	16.8965	379.808	0	380.481	290.613	26.3	0.0380762	58	8.05	23.5	NA	NA	NA	NA	NA	NA	NA	Silvaetal.,2003.
Fish(WarmWater)	Fish	no	SilverCatfish	Rhamdia_quelen	84-hr	Acute	LOEC	Mortality	Lethal	CaCl2,Hardness	Ca	Cl	no	66	24.95	0.95	0.622536	0.0390866	5.2	0.95	5.47368	16.8965	379.808	0	380.481	290.613	26.3	0.0380762	58	8.05	23.5	NA	NA	NA	NA	NA	NA	NA	Silvaetal.,2003.
Invertebrate(Cladoceran)	Invert	yes	WaterFlea	Ceriodaphnia_dubia	48-hr	Acute	LC50	Mortality	Lethal	MgCl2(A:0.33xALSW,T:0.33xALSW)	Mg	Cl	no	572.158	4.85	136	0.121014	5.59556	4.87	1.36	3.58088	17.7609	-0.410678	9900	-99.0041	3121.46	0.0356618	28.0412	14.5	7.45	25	NA	1230	2.0691	0.39098	NA	4.8028	397.04	Mountetal.,2016.
Invertebrate(Cladoceran)	Invert	yes	WaterFlea	Ceriodaphnia_dubia	48-hr	Acute	LC50	Mortality	Lethal	MgCl2(A:ALSW,T:0.33xALSW)	Mg	Cl	no	720.406	4.85	172	0.121014	7.07673	4.87	1.36	3.58088	17.7609	-0.410678	12547.1	-99.2125	3956.14	0.0281977	35.4639	14.5	7.45	25	NA	1510	2.0691	0.39098	NA	4.8028	499.845	Mountetal.,2016.
Invertebrate(Cladoceran)	Invert	yes	WaterFlea	Ceriodaphnia_dubia	48-hr	Acute	LC50	Mortality	Lethal	MgCl2(A:MHRW,T:0.33xMHRW)	Mg	Cl	no	348.875	4.65	81.9	0.116024	3.36968	4.65	4.01	1.1596	28.1242	0	1942.39	-95.1038	1140.48	0.0567766	17.6129	19	7.55	25	NA	813	8.7362	0.78196	NA	26.8957	227.589	Mountetal.,2016.
Invertebrate(Cladoceran)	Invert	yes	WaterFlea	Ceriodaphnia_dubia	48-hr	Acute	LC50	Mortality	Lethal	MgCl2(A:0.33xMHRW,T:0.33xMHRW)	Mg	Cl	no	355.876	4.65	83.6	0.116024	3.43962	4.65	4.01	1.1596	28.1242	0	1984.79	-95.2033	1165.37	0.055622	17.9785	19	7.6	25	NA	835	8.7362	0.78196	NA	26.8957	232.907	Mountetal.,2016.
Invertebrate(Cladoceran)	Invert	yes	WaterFlea	Ceriodaphnia_dubia	48-hr	Acute	LC50	Mortality	Lethal	MgCl2(A:0.125xMHRW,T:0.125xMHRW)	Mg	Cl	no	83.4603	1.76	19.2	0.0439144	0.789961	1.75	1.5	1.16667	10.5467	0.571429	1180	-92.1429	691.337	0.0916667	10.9091	7	7.25	25	NA	229	3.2186	0.39098	NA	10.5662	51.757	Mountetal.,2016.
Invertebrate(Cladoceran)	Invert	yes	WaterFlea	Ceriodaphnia_dubia	48-hr	Acute	LC50	Mortality	Lethal	MgCl2(A:MHRW,T:0.125xMHRW)	Mg	Cl	no	132.465	1.76	31.1	0.0439144	1.27957	1.75	1.5	1.16667	10.5467	0.571429	1973.33	-95.1493	1155.97	0.0565916	17.6705	7	7.25	25	NA	351	3.2186	0.39098	NA	10.5662	86.498	Mountetal.,2016.
Invertebrate(Cladoceran)	Invert	yes	WaterFlea	Ceriodaphnia_dubia	48-hr	Acute	LC50	Mortality	Lethal	MgSO4(A:0.125xMHRW,T:0.125xMHRW)	Mg	SO4	no	143.583	1.76	33.8	0.0439144	1.39066	1.75	1.5	1.16667	10.5467	0.571429	2153.33	-95.5368	1261.4	0.052071	19.2045	7	7.05	25	NA	630	3.2186	0.39098	NA	137.36	0.3545	Mountetal.,2016.
Invertebrate(Cladoceran)	Invert	yes	WaterFlea	Ceriodaphnia_dubia	48-hr	Acute	LC50	Mortality	Lethal	MgSO4(A:MHRW,T:0.125xMHRW)	Mg	SO4	no	252.71	1.76	60.3	0.0439144	2.48097	1.75	1.5	1.16667	10.5467	0.571429	3920	-97.4982	2296.09	0.0291874	34.2614	7	7.2	25	NA	978	3.2186	0.39098	NA	242.061	0.3545	Mountetal.,2016.
Invertebrate(Cladoceran)	Invert	yes	WaterFlea	Ceriodaphnia_dubia	48-hr	Acute	LC50	Mortality	Lethal	CaCl2(A:0.125xMHRW,T:0.125xMHRW)	Ca	Cl	no	1516.7	605	1.46	15.0956	0.0600699	1.75	1.5	1.16667	10.5467	34471.4	-2.66667	35418.6	14280.7	414.384	0.00241322	7	6.9	25	NA	2930	3.2186	0.39098	NA	10.5662	1070.59	Mountetal.,2016.
Invertebrate(Cladoceran)	Invert	yes	WaterFlea	Ceriodaphnia_dubia	48-hr	Acute	LC50	Mortality	Lethal	CaCl2(A:MHRW,T:0.125xMHRW)	Ca	Cl	no	1506.71	601	1.46	14.9958	0.0600699	1.75	1.5	1.16667	10.5467	34242.9	-2.66667	35183.8	14186	411.644	0.00242928	7	6.95	25	NA	2920	3.2186	0.39098	NA	10.5662	1063.5	Mountetal.,2016.
Invertebrate(Cladoceran)	Invert	yes	WaterFlea	Ceriodaphnia_dubia	48-hr	Acute	LC50	Mortality	Lethal	CaCl2(A:MHRW,T:ALSW)	Ca	Cl	no	1767.4	701	4.13	17.4909	0.169924	14.6	4.09	3.56968	53.2988	4701.37	0.977995	4654.87	3216.03	169.734	0.00589158	43	7.9	25	NA	3220	6.4372	1.56392	NA	15.369	1223.03	Mountetal.,2016.
Invertebrate(Cladoceran)	Invert	yes	WaterFlea	Ceriodaphnia_dubia	48-hr	Acute	LC50	Mortality	Lethal	CaCl2(A:MHRW,T:MHRW)	Ca	Cl	no	1880.54	733	12.2	18.2893	0.501954	14	12	1.16667	84.374	5135.71	1.66667	5049.88	2128.82	60.082	0.0166439	57	7.95	25	NA	3250	26.2086	1.9549	NA	80.687	1276.2	Mountetal.,2016.
Invertebrate(Cladoceran)	Invert	yes	WaterFlea	Ceriodaphnia_dubia	48-hr	Acute	LC50	Mortality	Lethal	MgCl2(A:MHRW,T:ALSW)	Mg	Cl	no	958.888	14.6	224	0.36429	9.21621	14.6	4.09	3.56968	53.2988	0	5376.77	-98.1741	1699.08	0.0651786	15.3425	43	7.85	25	NA	1900	6.4372	1.56392	NA	15.369	648.735	Mountetal.,2016.
Invertebrate(Cladoceran)	Invert	yes	WaterFlea	Ceriodaphnia_dubia	48-hr	Acute	LC50	Mortality	Lethal	MgCl2(A:MHRW,T:MHRW)	Mg	Cl	no	854.19	13.9	199	0.346824	8.18762	14	12	1.16667	84.374	-0.714286	1558.33	-94.0129	912.386	0.0698492	14.3165	57	7.95	25	NA	1730	26.2086	1.9549	NA	80.687	545.93	Mountetal.,2016.
Invertebrate(Cladoceran)	Invert	yes	WaterFlea	Ceriodaphnia_dubia	48-hr	Acute	LC50	Mortality	Lethal	MgSO4(A:MHRW,T:ALSW)	Mg	SO4	no	1749.54	14.6	416	0.36429	17.1158	14.6	4.09	3.56968	53.2988	0	10071.1	-99.0168	3182.52	0.0350962	28.4932	43	7.85	25	NA	2240	6.4372	1.56392	NA	1642.56	7.799	Mountetal.,2016.
Invertebrate(Cladoceran)	Invert	yes	WaterFlea	Ceriodaphnia_dubia	48-hr	Acute	LC50	Mortality	Lethal	MgSO4(A:MHRW,T:MHRW)	Mg	SO4	no	1747.8	13.9	416	0.346824	17.1158	14	12	1.16667	84.374	-0.714286	3366.67	-97.136	1971.49	0.0334135	29.9281	57	8	25	NA	2280	26.2086	1.9549	NA	1671.37	1.7725	Mountetal.,2016.
Invertebrate(Cladoceran)	Invert	yes	WaterFlea	Ceriodaphnia_dubia	48-hr	Acute	LC50	Mortality	Lethal	MgCO3(A:MHRW,T:ALSW)	Mg	CO3	no	1135.72	17.8	265	0.444134	10.9031	14.6	4.09	3.56968	53.2988	21.9178	6379.22	-98.1183	2030.85	0.0671698	14.8876	1120	9.25	25	NA	1160	6.4372	1.56392	NA	15.369	7.799	Mountetal.,2016.
Invertebrate(Cladoceran)	Invert	yes	WaterFlea	Ceriodaphnia_dubia	48-hr	Acute	LC50	Mortality	Lethal	MgCO3(A:MHRW,T:MHRW)	Mg	CO3	no	1154.56	17.1	270	0.426668	11.1088	14	12	1.16667	84.374	22.1429	2150	-94.5714	1268.38	0.0633333	15.7895	1115	9.25	25	NA	1230	26.2086	1.9549	NA	80.687	1.7725	Mountetal.,2016.
Invertebrate(Cladoceran)	Invert	yes	WaterFlea	Ceriodaphnia_dubia	48-hr	Acute	LC50	Mortality	Lethal	MgSO4(A:MHRW,T:0.33xALSW)	Mg	SO4	no	1342.22	4.85	323	0.121014	13.2894	4.87	1.36	3.58088	17.7609	-0.410678	23650	-99.5807	7457.2	0.0150155	66.5979	14.5	7.45	25	NA	1780	2.0691	0.39098	NA	1277.54	2.4815	Mountetal.,2016.
Invertebrate(Cladoceran)	Invert	yes	WaterFlea	Ceriodaphnia_dubia	48-hr	Acute	LC50	Mortality	Lethal	MgSO4(A:MHRW,T:3xALSW)	Mg	SO4	no	2543.11	43.8	591	1.09287	24.316	43.8	12.3	3.56098	160.02	0	4704.88	-97.9188	1489.24	0.0741117	13.4932	129	8.35	25	NA	2910	19.5415	4.69176	NA	2324.56	23.0425	Mountetal.,2016.
Invertebrate(Cladoceran)	Invert	yes	WaterFlea	Ceriodaphnia_dubia	48-hr	Acute	LC50	Mortality	Lethal	MgCl2(A:MHRW,T:0.33xALSW)	Mg	Cl	no	410.321	4.85	96.7	0.121014	3.97861	4.87	1.36	3.58088	17.7609	-0.410678	7010.29	-98.5994	2210.25	0.0501551	19.9381	14.5	7.25	25	NA	910	2.0691	0.39098	NA	4.8028	281.118	Mountetal.,2016.
Invertebrate(Cladoceran)	Invert	yes	WaterFlea	Ceriodaphnia_dubia	48-hr	Acute	LC50	Mortality	Lethal	MgCl2(A:MHRW,T:3xALSW)	Mg	Cl	no	1509.49	43.8	340	1.09287	13.9889	43.8	12.3	3.56098	160.02	0	2664.23	-96.3824	843.312	0.128824	7.76256	129	8.35	25	NA	2760	19.5415	4.69176	NA	45.1463	985.51	Mountetal.,2016.
Invertebrate(Cladoceran)	Invert	yes	WaterFlea	Ceriodaphnia_dubia	48-hr	Acute	LC50	Mortality	Lethal	CaCl2(A:ALSW,T:0.33xALSW)	Ca	Cl	no	1456.77	581	1.46	14.4967	0.0600699	4.87	1.36	3.58088	17.7609	11830.2	7.35294	11013	8102.13	397.945	0.00251291	14.5	7.35	25	NA	2870	2.0691	0.39098	NA	4.8028	1020.96	Mountetal.,2016.
Invertebrate(Cladoceran)	Invert	yes	WaterFlea	Ceriodaphnia_dubia	48-hr	Acute	LC50	Mortality	Lethal	CaCl2(A:ALSW,T:3xALSW)	Ca	Cl	no	1960.44	765	12.2	19.0878	0.501954	43.8	12.3	3.56098	160.02	1646.58	-0.813008	1660.89	1125.12	62.7049	0.0159477	129	7.95	25	NA	3510	19.5415	4.69176	NA	45.1463	1301.02	Mountetal.,2016.
Invertebrate(Cladoceran)	Invert	yes	WaterFlea	Ceriodaphnia_dubia	48-hr	Acute	LC50	Mortality	Lethal	MgCO3(A:ALSW,T:0.33xALSW)	Mg	CO3	no	484.958	6.21	114	0.154948	4.69039	4.87	1.36	3.58088	17.7609	27.5154	8282.35	-98.4788	2630.49	0.0544737	18.3575	477	8.95	25	NA	619	2.0691	0.39098	NA	4.8028	2.4815	Mountetal.,2016.
Invertebrate(Cladoceran)	Invert	yes	WaterFlea	Ceriodaphnia_dubia	48-hr	Acute	LC50	Mortality	Lethal	MgCO3(A:ALSW,T:3xALSW)	Mg	CO3	no	1242.4	12.7	294	0.316882	12.0963	43.8	12.3	3.56098	160.02	-71.0046	2290.24	-98.7869	676.405	0.0431973	23.1496	1290	9.15	25	NA	1280	19.5415	4.69176	NA	45.1463	23.0425	Mountetal.,2016.
Invertebrate(Cladoceran)	Invert	yes	WaterFlea	Ceriodaphnia_dubia	48-hr	Acute	LC50	Mortality	Lethal	MgSO4(A:MHRW,T:LowCa:Mg)	Mg	SO4	no	831.116	3.01	200	0.0751035	8.22876	3	11.1	0.27027	53.2008	0.333333	1701.8	-94.4315	1462.22	0.01505	66.4452	43	7.9	25	NA	1292	6.4372	1.56392	NA	760.764	7.799	Mountetal.,2016.
Invertebrate(Cladoceran)	Invert	yes	WaterFlea	Ceriodaphnia_dubia	48-hr	Acute	LC50	Mortality	Lethal	MgSO4(A:MHRW,T:HighCa:Mg)	Mg	SO4	no	1760.53	19	416	0.474076	17.1158	19	1.4	13.5714	53.2082	0	29614.3	-99.6635	3208.76	0.0456731	21.8947	43	7.95	25	NA	2232	6.4372	1.56392	NA	1652.16	7.799	Mountetal.,2016.
Invertebrate(Cladoceran)	Invert	yes	WaterFlea	Ceriodaphnia_dubia	48-hr	Acute	LC50	Mortality	Lethal	MgCl2(A:MHRW,T:LowCa:Mg)	Mg	Cl	no	287.952	3.01	68.1	0.0751035	2.80189	3	11.1	0.27027	53.2008	0.333333	513.514	-83.6461	441.255	0.0441997	22.6246	43	7.9	25	NA	654	6.4372	1.56392	NA	14.4084	173.705	Mountetal.,2016.
Invertebrate(Cladoceran)	Invert	yes	WaterFlea	Ceriodaphnia_dubia	48-hr	Acute	LC50	Mortality	Lethal	MgCl2(A:MHRW,T:HighCa:Mg)	Mg	Cl	no	1035.76	19	240	0.474076	9.87451	19	1.4	13.5714	53.2082	0	17042.9	-99.4167	1846.62	0.0791667	12.6316	43	7.9	25	NA	2041	6.4372	1.56392	NA	14.4084	705.455	Mountetal.,2016.
Invertebrate(Cladoceran)	Invert	yes	WaterFlea	Ceriodaphnia_dubia	48-hr	Acute	LC50	Mortality	Lethal	MgSO4(A:MHRW,T:LowCl:SO4)	Mg	SO4	no	1696.01	14.6	403	0.36429	16.581	14.6	4.09	3.56968	53.2988	0	9753.3	-98.9851	3082.08	0.0362283	27.6027	43	7.9	25	NA	2172	6.4372	1.56392	NA	1594.53	1.418	Mountetal.,2016.
Invertebrate(Cladoceran)	Invert	yes	WaterFlea	Ceriodaphnia_dubia	48-hr	Acute	LC50	Mortality	Lethal	MgSO4(A:MHRW,T:HighCl:SO4)	Mg	SO4	no	1597.18	14.6	379	0.36429	15.5935	14.6	4.09	3.56968	53.2988	0	9166.5	-98.9208	2896.65	0.0385224	25.9589	43	7.9	25	NA	2097	6.4372	1.56392	NA	1488.87	14.18	Mountetal.,2016.
Invertebrate(Cladoceran)	Invert	yes	WaterFlea	Ceriodaphnia_dubia	48-hr	Acute	LC50	Mortality	Lethal	MgCO3(A:MHRW,T:LowCl:SO4)	Mg	CO3	no	1185.38	17.9	277	0.446629	11.3968	14.6	4.09	3.56968	53.2988	22.6027	6672.62	-98.1897	2124.03	0.0646209	15.4749	1170	9.2	25	NA	1149	6.4372	1.56392	NA	21.1323	1.418	Mountetal.,2016.
Invertebrate(Cladoceran)	Invert	yes	WaterFlea	Ceriodaphnia_dubia	48-hr	Acute	LC50	Mortality	Lethal	MgCO3(A:MHRW,T:HighCl:SO4)	Mg	CO3	no	1123.11	17.7	262	0.441639	10.7797	14.6	4.09	3.56968	53.2988	21.2329	6305.87	-98.1075	2007.2	0.0675573	14.8023	1105	9.2	25	NA	1131	6.4372	1.56392	NA	3.84224	14.18	Mountetal.,2016.
Invertebrate(Cladoceran)	Invert	yes	WaterFlea	Ceriodaphnia_dubia	48-hr	Acute	LC50	Mortality	Lethal	CaCl2(A:ALSW,T:LowNa:K)	Ca	Cl	no	1737.44	689	4.13	17.1915	0.169924	14.6	4.09	3.56968	53.2988	4619.18	0.977995	4573.47	3159.81	166.828	0.00599419	43	7.9	25	NA	3168	7.5867	0.39098	NA	15.369	1205.3	Mountetal.,2016.
Invertebrate(Cladoceran)	Invert	yes	WaterFlea	Ceriodaphnia_dubia	48-hr	Acute	LC50	Mortality	Lethal	CaCl2(A:ALSW,T:HighNa:K)	Ca	Cl	no	1597.61	633	4.13	15.7942	0.169924	14.6	4.09	3.56968	53.2988	4235.62	0.977995	4193.62	2897.46	153.269	0.00652449	43	7.85	25	NA	2942	1.8392	10.1655	NA	15.369	1102.5	Mountetal.,2016.
Invertebrate(Cladoceran)	Invert	yes	WaterFlea	Ceriodaphnia_dubia	48-hr	Acute	LC50	Mortality	Lethal	MgCl2(A:ALSW,T:LowNa:K)	Mg	Cl	no	1078.31	14.6	253	0.36429	10.4094	14.6	4.09	3.56968	53.2988	0	6085.82	-98.3834	1923.14	0.0577075	17.3288	43	7.85	25	NA	2022	7.5867	0.39098	NA	15.465	730.27	Mountetal.,2016.
Invertebrate(Cladoceran)	Invert	yes	WaterFlea	Ceriodaphnia_dubia	48-hr	Acute	LC50	Mortality	Lethal	MgCl2(A:ALSW,T:HighNa:K)	Mg	Cl	no	1012.42	14.6	237	0.36429	9.75108	14.6	4.09	3.56968	53.2988	0	5694.62	-98.2743	1799.52	0.0616034	16.2329	43	7.9	25	NA	1968	1.8392	10.1655	NA	15.369	687.73	Mountetal.,2016.
Invertebrate(Cladoceran)	Invert	yes	WaterFlea	Ceriodaphnia_dubia	48-hr	Acute	LC50	Mortality	Lethal	MgSO4(A:ALSW,T:LowNa:K)	Mg	SO4	no	1737.19	14.6	413	0.36429	16.9924	14.6	4.09	3.56968	53.2988	0	9997.8	-99.0097	3159.34	0.0353511	28.2877	43	7.95	25	NA	2232	7.5867	0.39098	NA	1632.95	7.799	Mountetal.,2016.
Invertebrate(Cladoceran)	Invert	yes	WaterFlea	Ceriodaphnia_dubia	48-hr	Acute	LC50	Mortality	Lethal	MgSO4(A:ALSW,T:HighNa:K)	Mg	SO4	no	1918.38	14.6	457	0.36429	18.8027	14.6	4.09	3.56968	53.2988	0	11073.6	-99.105	3499.3	0.0319475	31.3014	43	8	25	NA	2329	1.8392	10.1655	NA	1805.85	7.799	Mountetal.,2016.
Invertebrate(Cladoceran)	Invert	yes	WaterFlea	Ceriodaphnia_dubia	48-hr	Acute	LC50	Mortality	Lethal	MgCl2(A:MHRW,T:LowAlkalinityALSW)	Mg	Cl	no	1000.07	14.6	234	0.36429	9.62765	14.6	4.09	3.56968	53.2988	0	5621.27	-98.2521	1776.34	0.0623932	16.0274	10	7.3	25	NA	2076	28.2777	1.56392	NA	91.2532	677.095	Mountetal.,2016.
Invertebrate(Cladoceran)	Invert	yes	WaterFlea	Ceriodaphnia_dubia	48-hr	Acute	LC50	Mortality	Lethal	MgCl2(A:MHRW,T:HighAlkalinityALSW)	Mg	Cl	no	695.336	14.6	160	0.36429	6.58301	14.6	4.09	3.56968	53.2988	0	3811.98	-97.4437	1204.6	0.09125	10.9589	90	8.25	25	NA	1542	28.2777	1.56392	NA	15.369	460.85	Mountetal.,2016.
Invertebrate(Cladoceran)	Invert	yes	WaterFlea	Ceriodaphnia_dubia	48-hr	Acute	LC50	Mortality	Lethal	MgSO4(A:MHRW,T:LowAlkalinityALSW)	Mg	SO4	no	1918.38	14.6	457	0.36429	18.8027	14.6	4.09	3.56968	53.2988	0	11073.6	-99.105	3499.3	0.0319475	31.3014	10	7.3	25	NA	2475	28.2777	1.56392	NA	1882.7	7.799	Mountetal.,2016.
Invertebrate(Cladoceran)	Invert	yes	WaterFlea	Ceriodaphnia_dubia	48-hr	Acute	LC50	Mortality	Lethal	MgSO4(A:MHRW,T:HighAlkalinityALSW)	Mg	SO4	no	1766.02	14.6	420	0.36429	17.2804	14.6	4.09	3.56968	53.2988	0	10168.9	-99.0262	3213.42	0.0347619	28.7671	90	8.2	25	NA	2263	28.2777	1.56392	NA	1661.77	7.799	Mountetal.,2016.
Invertebrate(Cladoceran)	Invert	yes	WaterFlea	Ceriodaphnia_dubia	48-hr	Acute	LC50	Mortality	Lethal	MgCl2(A:ALSW,T:ALSW)	Mg	Cl	no	1037.13	14.6	243	0.36429	9.99794	14.6	4.09	3.56968	53.2988	0	5841.32	-98.3169	1845.88	0.0600823	16.6438	43	7.85	25	NA	2045	6.4372	1.56392	NA	15.369	705.455	Mountetal.,2016.
Invertebrate(Cladoceran)	Invert	yes	WaterFlea	Ceriodaphnia_dubia	48-hr	Acute	LC50	Mortality	Lethal	MgCl2(A:ALSW,T:LowpHALSW)	Mg	Cl	no	1135.96	14.6	267	0.36429	10.9854	14.6	4.09	3.56968	53.2988	0	6428.12	-98.4682	2031.31	0.0546816	18.2877	43	6.75	25	NA	2057	6.4372	1.56392	NA	15.369	779.9	Mountetal.,2016.
Invertebrate(Cladoceran)	Invert	yes	WaterFlea	Ceriodaphnia_dubia	48-hr	Acute	LC50	Mortality	Lethal	MgCl2(A:ALSW,T:HighpHALSW)	Mg	Cl	no	1238.91	14.6	292	0.36429	12.014	14.6	4.09	3.56968	53.2988	0	7039.36	-98.5993	2224.46	0.05	20	43	8.5	25	NA	2257	6.4372	1.56392	NA	15.369	847.255	Mountetal.,2016.
Invertebrate(Cladoceran)	Invert	yes	WaterFlea	Ceriodaphnia_dubia	48-hr	Acute	LC50	Mortality	Lethal	MgCO3(A:ALSW,T:ALSWAged)	Mg	CO3	no	969.748	17.3	225	0.431658	9.25735	14.6	4.09	3.56968	53.2988	18.4932	5401.22	-97.8461	1719.46	0.0768889	13.0058	950	9.3	25	NA	1043	6.4372	1.56392	NA	15.369	7.799	Mountetal.,2016.
Invertebrate(Cladoceran)	Invert	yes	WaterFlea	Ceriodaphnia_dubia	48-hr	Acute	LC50	Mortality	Lethal	MgCO3(A:ALSW,T:3.0xALSWAged)	Mg	CO3	no	665.351	5.89	158	0.146963	6.50072	43.8	12.3	3.56098	160.02	-86.5525	1184.55	-98.9531	315.793	0.0372785	26.8251	730	9.3	25	NA	879	19.5415	4.69176	NA	45.1463	23.0425	Mountetal.,2016.
Invertebrate(Cladoceran)	Invert	yes	WaterFlea	Ceriodaphnia_dubia	48-hr	Acute	LC50	Mortality	Lethal	MgCO3(A:ALSW,T:ALSWFresh)	Mg	CO3	no	998.824	17.4	232	0.434153	9.54536	14.6	4.09	3.56968	53.2988	19.1781	5572.37	-97.899	1774.01	0.075	13.3333	980	9.15	25	NA	1054	6.4372	1.56392	NA	15.369	7.799	Mountetal.,2016.
Invertebrate(Cladoceran)	Invert	yes	WaterFlea	Ceriodaphnia_dubia	48-hr	Acute	LC50	Mortality	Lethal	MgCO3(A:ALSW,T:3.0xALSWFresh)	Mg	CO3	no	818.217	6.09	195	0.151954	8.02304	43.8	12.3	3.56098	160.02	-86.0959	1485.37	-99.123	411.322	0.0312308	32.0197	880	9	25	NA	941	19.5415	4.69176	NA	45.1463	23.0425	Mountetal.,2016.
Invertebrate(Cladoceran)	Invert	yes	WaterFlea	Ceriodaphnia_dubia	48-hr	Acute	LC50	Mortality	Lethal	CaGluconate(A:ALSW,T:ALSW)	Ca	Gluconate	no	3313.05	1320	4.13	32.9358	0.169924	14.6	4.09	3.56968	53.2988	8941.1	0.977995	8853.53	6115.99	319.613	0.00312879	43	7.8	25	NA	2074	6.4372	1.56392	NA	15.369	7.799	Mountetal.,2016.
Invertebrate(Cladoceran)	Invert	yes	WaterFlea	Ceriodaphnia_dubia	48-hr	Acute	LC50	Mortality	Lethal	MgGluconate(A:ALSW,T:ALSW)	Mg	Gluconate	no	1766.02	14.6	420	0.36429	17.2804	14.6	4.09	3.56968	53.2988	0	10168.9	-99.0262	3213.42	0.0347619	28.7671	43	7.8	25	NA	1638	6.4372	1.56392	NA	15.369	7.799	Mountetal.,2016.
Invertebrate(Cladoceran)	Invert	yes	WaterFlea	Daphnia_magna	96-hr	Acute	LT50	Mortality	Lethal	Waterhardness,alkalinity(CaCO3precipitation)	Ca	CO3,SO4	time	600	NA	NA	NA	NA	NA	NA	NA	250	NA	NA	NA	140	1.2	NA	420	8.5	20	1900	NA	NA	NA	NA	NA	NA	Bogartetal.,2016.

## Sheet: Classified as secondary_Referen
Full reference of studies classified as primary or secondary
1	Biesinger, KE, and Christensen, GM. 1972. Effects of various metals on survival, growth, reproduction, and metabolism of Daphnia magna. Journal of Fisheries Research Board of Canada, 29(12): 1691-1700.
2	Bogart, SJ, Woodman, S, Steinkey, D, Meays, C, and Pyle, GG. 2016. Rapid changes in water hardness and alkalinity: Calcite formation is lethal to Daphnia magna. Science of the Total Environment, 559: 182-191.
3	Hogan, AC, Trenfield, MA, Harford, AJ, and Van Dam, RA. 2013. Toxicity of magnesium pulses to tropical freshwater species and the development of a duration based water quality guideline. Environmental Toxicology and Chemistry, 32(9): 1969-1980.
4	Mount, DR, Erickson, RJ, Highland, TL, Hockett, JR, Hoff, DJ, Jenson, CT, Norberg-King, TJ, Peterson, KN, and Polaske, ZM. 2016. The acute toxicity of major ion salts to Ceriodaphnia dubia: 1. Influence of background water chemistry. Environmental Toxicology and Chemistry, 35:(12) 3039-3057.
5	Mount, DR, Gulley, DD, Hockett, JR, Garrison, TD, and Evans, JM. 1997. Statistical models to predict the toxicity of major ions to Ceriodaphnia dubia, Daphnia magna and Pimpephales promelas (fathead minnows). Environmental Toxicology and Chemistry, 16(10): 2009-2019.
6	Silva, LVF, Golombieski, JI, and Baldisserotto, B. 2003. Incubation of silver catfish, Rhamadia quelen (Pimelodidae), eggs at different calcium and magnesium concentrations. Aquaculture, 228: 279-287.
7	van Dam, RA, Hogan, AC, McCullough, CD, Houston, MA, Humphrey, CL, and Harford, AJ. 2010. Aquatic toxicity of magnesium sulfate and the influence of calcium, in very low ionic concentration water. Enviornmental Toxicology and Chemistry, 29 (2): 410-421.

## Sheet: Classified as unacceptable
No.	List of studies classified as unacceptable for the derivation of a water hardness WQG
	Full Reference	Common Name	Scientific Name	Reason for Unacceptable Ranking
1	Anderson, BG. 1944. The toxicity of various substances found in the industrial wastes as determined by the use of Daphnia magna. Sewage Works Journal, 16(6): 1156-1165.	Water Flea	Daphnia magna	Treatment concentrations nominal and n=1.
2	Anderson, BG. 1950. The apparent thresholds of toxicity to Daphnia magna for chlorides of various metals when added to lake Erie water. Transactions of the American fisheries society, 78(1): 96-113.	Water Flea	Daphnia magna	Treatment concentrations nominal and n=1.
3	Baek, MJ, Yoon, TJ, Kim, DG, Lee, CY, Cho,K, and Bae, YJ. 2014. Effects of road deicer runoff on benthic macroinvertebrate communities in Korean freshwaters with toxicity tests of calcium chloride CaCl2. Water Air and Soil Pollution, 225 (6): 1-14.	Atyid Shrimp (Decapoda)	Caridina denticulata denticulata	No water quality data.
		Mayfly (Baetidae)	Cloeon dipterum
		Mayfly (Heptageniidae)	Ecdyonurus levis
		Midge (Chironomidae)	Glyptotendipes tokunagai
		Scud (Gammarus)	Gammarus sobaegensis
4	Baillieul, M, Bervoets, L, Blust, R and De Boeck, G. 1993. Assessment of the toxicity of an industrial effluent with a two-generation reproduction test using Daphnia magna. Science of the Total Environment, Supplement 1993, 1159-1164.	Water Flea	Daphnia magna	No water quality data.
5	Baldisserotto, BC, Kamunde, C, and Wood, CM. 2004. A protective effect of dietary calcium against waterborne cadmium uptake in rainbow trout. Aquatic Toxicology, 67: 57-73.	Rainbow Trout	Oncorhynchus mykiss	Dietary calcium study; study not applicable.
6	Baudouin, MF, and, Scoppa, P. 1974. Acute toxicity of various metals to freshwater zooplankton. Bulletin of Environmental Contamination and Toxicology, 12(6): 745-751.	Copepod	Cyclops abyssorum prealpinus	All concentrations are reported as amounts of salts added; no correction calculated. Adults of all species were tested; no standard test protocol referenced. Test concentrations were not measured and no analytical techniques described for ion measurements in dilution (lake) water.
		Water Flea	Daphnia hyalina
7	Bengtsson, BE. 1978. Use of a harpacticoid copepod in toxicity tests. Marine Pollution Bulletin, 9: 238-241.	Copepod	Nitocra spinipes	Conductivity and dissolved oxygen not reported. Species is a brackish water species and was tested in 7 ppt salinity. Treatments not analytically defined.
8	Brown, DJA. 1981. The effects of various cations on the survival of brown trout, Salmo trutta at low pHs. Journal of Fish Biology, 18: 31-40.	Brown Trout	Salmo trutta	Fish tested at very low (3.5-4.0) pH with Ca, Mg as toxicity modifiers. Ion concentrations (treatments) not analytically confirmed. No description of replication however graphs show error bars. Alkalinity, conductivity and dissolved oxygen not reported.
9	Cairns, J, and Scheier, A. 1958. The relationship of bluegill sunfish body size to tolerace for some common chemicals. Proceedings of the 13th Industrial Waste Conference, Engineering Bulletin, Purdue University, 96: 243-252.	Bluegill Sunfish	Lepomis marcochirus	Alkalinity, conductivity, pH and water hardness not reported (i.e. only 3/6 required variables reported). Treatment and control replication unknown. Statistical method not referenced.
10	Cowgill, UM, Milazzo, DP. 1991a. The sensitivity of two cladocerans to water quality variables: Salinity <467 mg NaCl/L and hardness <200 mg CaCO3/L. Archives of Environmental Contamination and Toxicology, 21(2): 218-223.	Water Flea	Ceriodaphnia dubia	Novel test methods (test water preparation) not fully specified to allow repeating the tests. Sometimes effect concentration was beyond tested range, i.e. not calculable. Note a hardness decrease was tested in this study.
		Water Flea	Daphnia magna
11	Cowgill, UM, Milazzo, DP. 1991b. Demographic effects of salinity, water hardness and carbonate alkalinity on Daphnia magna and Ceriodaphnia dubia. Archiv fur Hydrobiologie, 122(1): 33-56.	Water Flea	Ceriodaphnia dubia	Authors reported 48 hr results in their results section but in the methods the test length was 9-10 days depending on species; no information was provided as to reconcile this discrepancy. Novel test methods and preparation of treatment waters unclearly described, which limits repeatability of the study. Sometimes effect concentration was beyond tested range, i.e. not calculable.
		Water Flea	Daphnia magna
12	Dooren de Jong, LE. 1965. Tolerance of Chlorella vulgaris for metallic and non-metallic ions. Antonie Van Leeuwenhoek, 31: 301-313.	Green Algae	Chlorella vulgaris	Lack of water quality data and temperature is an approximation; reported as room temperature.
13	Dougherty, CK, and Smith, GR. 2006. Acute effects of road de-icers on the tadpoles of three anurans. Applied Herpetology, 3: 87-93.	African Clawed Frog	Xenopus laevis	No water quality data.
		American Toad	Bufo americanus
		Green Frog	Rana clamitans
14	Dowden, BF. 1960. Cumulative toxicities of some inorganic salts to Daphnia magna as determined by median tolerance limits. Louisiana Academy of Sciences, 23: 77-85.	Water Flea	Daphnia magna	No water quality data, only temperature reported.
15	Dowden, BF, and Bennett, HJ. 1965. Toxicity of selected chemicals to certain animals. Water Pollution Control Federation, 37(9): 1308-1316.	Bluegill Sunfish	Lepomis marcochirus	No water quality data.
		Pulmonate Snail Species	Lymnaea sp.
		Water Flea	Daphnia magna
16	Gomes, PIA, and Asaeda, T. Phycoremediation of chromium (VI) by Nitella and impact of calcium encrustation. Journal of Hazardous Materials, 166: 1332-1338.	Stonewort	Nitella pseudoflabellata	No water quality data, only temperature reported.
17	Harless, ME, Huckins, CJ, Grant, JB, and Pypker, TG. 2011. Effects of six chemical deicers on larval wood frogs (Rana sylvatica). Environmental Toxicology and Chemistry, 30(7): 1637-1641.	Wood Frog	Rana sylvatica	No water quality data, only temperature reported.
18	Jones, JRE. 1939. The relation between the electrolytic solution pressures of the metals and their toxicity to the stickleback Gasterosteus aculeatus. Journal of Experimental Biology, 16: 425-437.	Three-spined Stickleback	Gasterosteus aculeatus	Lack of water quality data; only temperature and pH reported.
19	Joutti, A, Schultz, A, Pessala, P, Nysten, T, and Hellsten, P. 2003. Ecotoxicity of alternative deicers. Journal of Soils and Sediments, 3(4): 269-272.	Duckweed	Lemna spp.	No water quality data, only temperature reported.
20	Kennedy, C.J. 2012a. Report on toxicological assessment of the effect of water hardness and composition on the acute and chronic toxicity of sulphate, nitrate, zinc, and cadmium to fish (Oncorhynchus mykiss) and freshwater invertebrates (Daphnia magna). Submitted to the BCMOE, 51 pp.	Water Flea	Daphnia magna	WQG suitable endpoints not reported for water hardness only tests, however executive summary stated a 10% mortality of trout at 1500 mg/L as CaCO3 hardness at Ca:Mg ratio of 0:100. Water hardness samples taken at unknown frequency, analysis method not reported, and hardness, Ca, Mg concentrations not reported. No validation of Ca:Mg ratios reported.
		Rainbow Trout	Oncorhynchus mykiss
21	Kennedy, C.J. 2012b. Report on assessment of toxiological effects of sulphate under varying water hardness conditions using the early life stages of rainbow trout (Oncorhynchus mykiss). Submitted to the BCMOE, 9 pp.	Rainbow Trout	Oncorhynchus mykiss	Methods for hardness only test not described; assume similar to hardness plus SO4 test. Water hardness samples taken at unknown frequency, analysis method not reported, and hardness, Ca, Mg concentrations not reported. Unknown statistical handling of pseudoreplicated study (true n=3 but reported n=15).
22	Ketola, H.G., Longacre, D., Greulich, A., Phetterplace, L., and Lashomb, R. 1988. High calcium concentration in water increases mortality of salmon and trout eggs. The Progressive Fish-Culturist, 50 (3): 129-135.	Rainbow Trout	Oncorhynchus mykiss	No suitable endpoints reported. Lack of water quality data; dissolved oxygen, alkalinity, and conductivity not reported.
23	Khangarot, BS, and Ray, PK. 1989. Investigation of correlation between physiochemical properties of metals and their toxicity to the water flea Daphnia magna. Ecotoxicology and Environmental Safety, 18: 109-120.	Water Flea	Daphnia magna	Treatment/stock concentrations not analytically described. Daphnia collected from a pond; lifestage not reported.
24	Khangarot, BS. 1991. Toxicity of metals to a freshwater tubificid worm, Tubifex tubifex. Bulletin of Environmental Contamination and Toxicology, 46: 906-912.	Sludge Worm	Tubifex tubifex	Toxicant Ca, Mg concentrations not measured/not reported in treatments or stocks, only reported for dilution water.
25	Mallick, A, Mohapatra, BC, and Sarangi, N. 2014. Acute toxicity of calcium chloride on different stages (egg, spawn, fry, fingerling) of rohu (Labeo rohita). Research Journal of Animal, Veterinary and Fishery Sciences, 2(8): 11-16.	Rohu Carp	Labeo rohita	No water quality data
26	Mazuran, N, Hrsak, V, Tomic, M, and Papes, D. 1999. Effects of CaCl2 and CaBr2 on the fecundity of Planorbarius corneus. Chemosphere, 38(10): 2345-2355.	Great Ramshorn Snail	Planorbarius corneus	Lack of water quality data; alkalinity, conductivity, and dissolved oxygen not reported.
27	McCulloch, WL, Goodfellow, WL, and Black, JA. 1993. Characterization, identification and confirmation of total dissolved solids as effluent toxicants. Environmental Toxicology and Risk Assessment, 2: 213-227.	Water Flea	Daphnia magna	No water quality data
28	Meyer, JS, Sanchez, DA, Brookman, JA, McWhorter, DB , and Bergman, HL. 1985. Chemistry and aquatic toxicity of raw oil shale leachates from Piceance Basin, Colorado. Environmental Toxicology and Chemistry, 4: 559-572.	Fathead Minnow	Pimephales promelas	No Ca content reported for exposure water used in tests, stocks, or in dilution water (water hardness as an endpoint incalculable). Ca and Mg content in salt exposures not analytically confirmed. Control mortality not reported.
29	Olasehinde, GI, and Oyerinde, JPO. 2007. Effect of calcium chloride on growth and survival of Biomphalaria pfeifferi intermediate host of Schistosoma mansoni. Research Journal of Parasitology, 2(2): 82-86.	Ram's Horn Snail	Biomphalaria pfeifferi	No water quality data, only temperature reported.
30	Patrick, R, Cairns Jr,J ,and Scheier, A. 1968. The relative sensitivity of diatoms, snails and fish to twenty common constituents of industrial wastes. Progressive Fish Culturist, 30(3): 137-140.	Bluegill Sunfish	Lepomis marcochirus	No water quality data, only dissolved oxygen reported.
		Diatom	Nitzschia linearis
31	Price, EE. 1989. Response of freshwater and saltwater toxicity test species to calcium and salinity concentrations encountered in toxicity tests. Doctor of Philosophy (Biology), University of North Texas, Texas, USA, 124 pp.	Water Flea	Daphnia magna	No water quality data.
32	Simmons, JA. 2012. Toxicity of major cations and anions (Na, K, Ca, Cl and SO4) to a macrophyte and an alga. Environmental Toxicology and Chemistry, 31(6): 1370-1374.	Duckweed	Lemna minor	No water quality reported. Treatments measured by changes in conductivity only.
		Green Algae	Pseudokirchneriella subcapitata
33	Soucek, DJ. 2007. Comparison of hardness and chloride regulated acute effects of sodium sulfate on two freshwater crustaceans. Environmental Toxicology and Chemistry, 26(4): 773-339.	Freshwater Shrimp	Hyalella azteca	SO4 as a toxicant with hardness as a modifier; study not applicable.
		Water Flea	Ceriodaphnia dubia
34	Soucek, DJ, and Kennedy, AJ. 2005. Effects of hardness, chloride, and acclimation on the acute toxicity of sulfate to freshwater invertebrates. Environmental Toxicology and Chemistry, 24 (5): 1204-1210.	Fingernail Clam	Sphaerium simile	SO4 as a toxicant with hardness as a modifier; study not applicable.
		Freshwater Shrimp	Hyalella azteca
		Midge	Chironomus tentas
		Water Flea	Ceriodaphnia dubia
35	Soucek, DJ, Linton, TK, Tarr, CD, Dickinson, A, Wickramanayke, N, Delos, CG, and Cruz, LA. 2011. Influence of water hardness and sulfate on the acute toxicity of chloride to sensitive freshwater invertebrates. Environmental Toxicology and Chemistry, 30(4): 930-938.	Fingernail Clam	Sphaerium simile	Paper is about Cl toxicity with hardness as a modifying factor; study not applicable.
		Long Fingernail Clam	Musculium transversum
		Ram Horn Snail	Gyraulus parvus
		Sludge Worm	Tubifex tubifex
		Water Flea	Ceriodaphnia dubia
36	Tatara, CP, Newman, MC, McCloskey, JT, and Willans, PL. 1997. Predicting relative metal toxicity with ion charateristics: Caenorhabditis elegans LC50. Aquatic Toxicology, 39: 279-290.	Roundworm	Caenorhabditis elegans	No water quality, only temperature reported.
37	Taylor, PA, Stewart, AJ, Holt, L. 1988. Toxicity of common salts to three biotoxicity test organisms. Martin Marietta Energy Systems, Inc. for the U.S. Department of Energy, Tennessee, USA, 8 pp.	Fathead Minnow	Pimephales promelas	No water quality, only temperature reported.
		Water Flea	Ceriodaphnia dubia
38	Trama, FB. 1954. The acute toxicity of some common salts of sodium, potassium and calcium to the common bluegill (Lepomis macrochirus Rafinesque). Proceedings of the Academy of Natural Sciences of Philadelphia, 106: 185-205.	Bluegill Sunfish	Lepomis marcochirus	No lifestage reported; just fish length. Hardness measured in experimental treatments every 24 hrs but analytical method for hardness determination not reported. No water changes indicated throughout 96-hr experiment but authors reported no loss in controls. Toxicity of CaSO4 was beyond solubility limit of the salt at 20°C (i.e. >2980 mg/L, effect not calculable).
39	Tsuji, S, Tonogai, Y, Ito, Y, and Kanoh, S. 1986. The influence of rearing temperature on toxicity of various environmental pollutants for killifish (Oryzias latipes). Eisei Kagaku, 32(1): 46-53.	Japanese Medaka (Killifish)	Oryzias latipes	No water quality, only temperature reported. Only select sections of paper in English; could not fully evaluate study.
40	Wallen, IE, Greer, WC, and Lasater, R. 1957. Toxicity to Gambusia affinisof certain pure chemicals in turbid waters. Sewage and Industrial Wastes, 29(6): 695-711.	Mosquitofish	Gambusia affinis	Effect concentration beyond tested range, i.e. not calculable. Dissolved oxygen maintained by a compressor during test but not measured. Turbidity a covariate but decreased by >20% during test. Authors considered individual fish as replicates even though true statistical replication is n=1 ; all fish were exposed in 1 test chamber at each concentration (pseudoreplicated study).
41	Young, RT. 1923. Resistance of fish to salts and alkalinity. American Journal of Physiology, 63: 373-388.	Brown Bullhead	Ameriurus nebulosus	Lack of water quality data, n=2, non-standard test procedure: Salt concentration gradually increased until no fish survived. Fish age not reported, pseudoreplicated experiment (1 exposure container with multiple fish inside, n=1).
		Yellow Perch	Perca flavescens

## Sheet: Rejected by prelim screening
Additional studies reviewed but excluded from classification at preliminary screening stage
No.	Full Reference	Common Name	Scientific Name	Reason for exclusion from literature classification procedure
1	Nagaraj, M. 1992. Combined effects of temperature and salinity on the development of the copepod Eurytemora affinis. Aquaculture, 103: 65-71.	Euryhaline Calanoid Copepod	Eurytemoru affinis	No endpoint available and/or total salinity studied
2	Adiele, RC, Stevens, D, and Kamunde, C. 2011. Cadmium- and calcium-mediated toxicity in rainbow trout (Oncorhynchus mykiss) in vivo: Interaction on fitness and mitochondrial endpoints. Chemosphere, 85: 1604-1613 .	Rainbow Trout	Oncorhynchus mykiss	Metal studied with hardness as a modifier
3	Bianchini, A, and Wood, CM. 2008. Does sulfide or water hardness protect against chronic silver toxicity in Daphnia magna? A critical assessment of the acute-to-chronic toxicity ratio for silver. Ecotoxicology and Enviromental Safety, 71: 32-40.	Water Flea	Daphnia magna	Metal studied with hardness as a modifier
4	Borgmann, U, Couillard, Y, Doyle, P, and Dixon, G. 2005. Toxicity of sixty-three metals and metalloids to Hyalella azteca at two levels of water hardness. Enviromental Toxicology and Chemistry, 24(3): 641-652.	Freshwater Shrimp	Hyalella azteca	Metal studied with hardness as a modifier
5	Charles, AL, Markich, SJ, Stauber, JL, and De Filippis, LF. 2002. The effect of water hardness on the toxicity of uranium to a tropical freshwater alga (Chlorella sp.). Aquatic Toxicology, 60: 61-73.	Green Alga	Chlorella sp.	Metal studied with hardness as a modifier
6	Craig, PM, Wood, CM, and McClelland, GB. 2010. Water chemistry alters gene expression and physiological endpoints of chronic waterborne copper exposure in zebrafish, Danio rerio. Environmental Science and Technology, 44: 2156-2162.	Zebrafish	Danio rerio	Metal studied with hardness as a modifier
7	Davies, PH, Goettl Jr., JP, and Sinley, JR. 1978. Toxicity of silver to rainbow trout, (Salmo gairdneri). Water Research 12: 113-117.	Rainbow Trout	Oncorhynchus mykiss	Metal studied with hardness as a modifier
8	Erickson, RJ, Benoit, DA, Mattson, VR, Leonard, EN, and Nelson Jr., HP. 1996. The effects of water chemistry on the toxicity of copper to fathead minnows. Environmental Toxicology and Chemistry, 15: 181-193.	Fathead Minnow	Pimephales promelas	Metal studied with hardness as a modifier
9	Erickson, RJ, Brooke, LT, Kahl, MD, Vende Venter, F, Harting, SL, Markee, TP, and Spehar, RL. 1998. Effect of laboratory test conditions on the toxicity of silver to aquatic organisms. Environmental Toxicology and Chemistry, 17(4): 572-578.	Fathead Minnow	Pimephales promelas	Metal studied with hardness as a modifier
10	Gauss, JD, Wood, PE, Winner, RW, and Skillings, JH. 1985. Acute toxicity of copper to three life stages of Chironomus tentans as affected by water hardness-alkalinity. Environmental Pollution, 37: 149-157.	Midge	Chironomus tentas	Metal studied with hardness as a modifier
11	Gillis, PL, Mitchell, RJ, Shwalb, AN, McNichols, KA, Mackie, GL, Wood, CM, and Ackerman, JD. 2008. Sensitivity of the glochidia (larvae) of freshwater mussels to copper: Assessing the effect of water hardness and dissolved organic carbon on the sensitivity of endangered species. Aquatic Toxicology, 88: 137-145.	Mucket	Actinonaias ligamentina	Metal studied with hardness as a modifier
		Fatmucket Clam	Lampsilis siliquidea
		Black Sandshell	Ligumia recta
		Northern Riffleshell	Epioblasma torulosa rangiana
		Snuffbox	Epioblasma triquetra
		Wavy-Rayed Lampmussel	Lampsilis fasciola
		Round Hickorynut	Obovaria subrotunda
		Kidneyshell	Ptychobranchus fasciolaris
		Rayed Bean	Villosa fabialis
12	Gopalapillai, Y, Hale, B, and Vigneaul, B. 2013. Effect of major cations (Ca²⁺, Mg²⁺, Na⁺, K) and anions (SO₄²⁻, Cl⁻, NO³⁻) on Ni accumulation and toxicity in aquatic plant (Lemina minor L.): implications for Ni risk assessment. Environmental Toxicology and Chemistry, 32(4): 810-821.	Lesser Duckweed	Lemna minor	Metal studied with hardness as a modifier
13	Harford, AJ, Mooney, TJ, Trenfield, MA, and van Dam, RA. 2015. Manganese toxicity to tropical freshwater species in low hardness water. Environmental Toxicology and Chemistry, 34(12): 2856-2863.	Green Alga	Chlorella sp.	Metal studied with hardness as a modifier
		Lesser Duckweed	Lemna aequinoctialis
		Cuming's Pouch Snail	Amerianna cumingi
		Water Flea	Moinodaphnia macleayi
		Green Hydra	Hydra viridissima
		Northern Trout Gudgeon	Mogurnda mogurnda
14	Huebert, DB, and Shay, JM. 1991. The effect of cadmium and its interaction with external calcium in the submerged aquatic macrophye Lemna trisulca L. Aquatic Toxicology, 20: 57-72.	Ivy-Leaved Duckweed	Lemna trisulca	Metal studied with hardness as a modifier
15	Jones, JRE. 1937. The relative toxicity of salts of lead, zinc, and copper to the stickleback (Gasterosteus aculeatus L.) and the effect of calcium on the toxicity of lead and zinc salts. Journal of Experimental Biology, 15: 394-407.	Three-spined Stickleback	Gasterosteus aculeatus	Metal studied with hardness as a modifier
16	Kuchapski, KA, and Rasmussen, JB. 2015. Food chain transfer and exposure effects of selenium in salmonid fish communities in two watersheds in the Canadian Rocky Mountains. Canadian Journal of Fisheries and Aquatic Sciences, 72: 955-967.	Brook Trout	Salvelinus fontinalis	Metal studied with hardness as a modifier
		Cutthroat Trout	Oncorhynchus clarkii lewisi
		Bull Trout	Salvelinus confluentus
		Rainbow Trout	Oncorhynchus mykiss
17	Linbl, TL, Baldwin, DH, McIntyre, JK, and Scholz, NL. 2009. Effects of water hardness, alkalinity, and dissolved organic carbon on the toxicity of copper to the lateral line of developing fish. Environmental Toxicology and Chemistry, 28(7): 1455-1461.	Zebrafish	Danio rerio	Metal studied with hardness as a modifier
18	Mount, DI, and Stephan, CE. 1969. Chronic toxicity of copper to the fathead minnow (Pimephales promelas) in soft water. Jounal of Fisheries Research Board of Canada, 26(9): 2449-2457.	Fathead Minnow	Pimephales promelas	Metal studied with hardness as a modifier
19	Mount, DI. 1966. The effect of total hardness and pH on acute toxicity of zinc to fish. Air & Water Pollution International Journal, 10: 49-56.	Fathead Minnow	Pimephales promelas	Metal studied with hardness as a modifier
20	Naddy, RB, Gorsuch, JW, Rehner, AB, McNerney, GR, Bell, RA, and Kramer, JR. 2007. Chronic toxicity of silver nitrate to Ceriodaphnia dubia and Daphnia magna, and potential mitigation factors. Aquatic Toxicology, 84: 1-10.	Water Flea	Ceriodaphnia dubia	Metal studied with hardness as a modifier
		Water Flea	Daphnia magna
21	Nebeker, AV, McAulife, CK, Mshar, R, and Stevens, DG. 1983. Toxicity of silver to steelhead and rainbow trout, fathead minnows and Daphnia magna. Environmental Toxicity and Chemistry, 2: 95-104.	Fathead Minnow	Pimephales promelas	Metal studied with hardness as a modifier
		Rainbow Trout (freshwater and sea-run)	Oncorhynchus mykiss
		Water Flea	Daphnia magna
22	Niyogi, S, Nadella, SR, and Wood, CM. 2015. Interactive effects of waterborne metals in binary mixtures on short-term gill-metal binding and iron uptake in rainbow trout (Oncorhynchus mykiss). Aquatic Toxicology, 165: 109-119.	Rainbow Trout	Oncorhynchus mykiss	Metal studied with hardness as a modifier
23	Pärt, P, Svanberg, O, and Bergström, E. 1985.The influence of surfactants on gill physiology and cadmium uptake in perfused rainbow trout gillls. Ecotoxicology and Environmental Safety, 9: 135- 144.	Rainbow Trout	Oncorhynchus mykiss	Metal studied with hardness as a modifier
24	Pascoe, D, Evans, SA, and Woodworth, J. 1986. Heavy metals toxicity to fish and the influence of water hardness. Archives of Environmental Contamination and Toxicology, 15: 481-487.	Rainbow Trout	Oncorhynchus mykiss	Metal studied with hardness as a modifier
25	Paulauskis, JD, and Winner, RW. 1988. Effects of water hardness and humic acid on zinc toxicity to Daphnia magna Straus. Aquatic Toxicology, 12: 237-290.	Water Flea	Daphnia magna	Metal studied with hardness as a modifier
26	Playle, RC, and Dixon, DG, and Burnison, K. 1993. Copper and cadmium binding to fish gills: modification by dissolved organic carbon and synthetic ligands. Canadian Journal of Fisheries and Aquatic Sciences, 50: 2667-2677.	Fathead Minnow	Pimephales promelas	Metal studied with hardness as a modifier
27	Rai, LC, Gaur, JP, and Kumar, HD. 1981. Protective effects of certain environmental factory on the toxicity of zinc, mercury, and methylmercury to Chlorella vulgaris. Environmental Research, 25: 250-259.	Green Alga	Chlorella vulgaris	Metal studied with hardness as a modifier
28	Rathore, RS, and Khangarot, BS. 2003. Effects of water hardness and metal concentration on a freshwater Tubifex tubifex Müller. Water, Air, and Soil Pollution, 142: 341-356.	Sludge Worm	Tubifex tubifex	Metal studied with hardness as a modifier
29	Richards, JG, and Playle, RC. 1999. Protective effects of calcium against the physiological effects of exposure to a combination of cadmium and copper in rainbow trout (Oncorhynchus mykiss). Canadian Journal of Zoology, 77: 1035-1047.	Rainbow Trout	Oncorhynchus mykiss	Metal studied with hardness as a modifier
30	Riethmuller, N, Markich, SJ, Van Dam, RA, and Parry, D. 2001. Effects of water hardness and alkalinity on the toxicity of uranium to a tropical freshwater hydra (Hydra viridissima). Biomarkers, 6(1): 45-51.	Green Hydra	Hydra viridissima	Metal studied with hardness as a modifier
31	Sciera, KL, Isely, JJ, Tomasso Jr., JR, and Klaine, SJ. 2004. Influence of multiple water-quality characteristics on copper toxicity to fathead minnows (Pimephales promelas). Environmental Toxicology and Chemistry, 23(12): 2900-2905.	Fathead Minnow	Pimephales promelas	Metal studied with hardness as a modifier
32	Tabak, LM, and Gibbs, KE. 1991. Effects of aluminum, calcium, and low pH on egg hatching and nymphal survival of Cloeon triangulifer McDunnough (Ephemeroptera: Baetidae). Hydrobiologia, 218: 157-166.	Stream Mayfly	Cloeon triangulifer	Metal studied with hardness as a modifier
33	Terzi, E, and Verep, B. 2011. Effect of water hardness and temperature on the acute toxicity of mercuric chloride on rainbow trout (Oncorhynchus mykiss). Toxicology and Industrial Health, 28(6): 499-504.	Rainbow Trout	Oncorhynchus mykiss	Metal studied with hardness as a modifier
34	Waiwood, KG. 1980. Changes in Hematocrit of rainbow trout exposed to various combinations of water hardness, pH, and copper. Transactions of the American Fisheries Society, 109(4): 461-463.	Rainbow Trout	Oncorhynchus mykiss	Metal studied with hardness as a modifier
35	Welsh, PG, Lipton, J, Chapman, GA, and Podrabsky, TL. 2000. Relative importance of calcium and magnesium in hardness-based modification of copper toxicity. Environmental Toxicology and Chemistry, 19(6): 1624-1631.	Rainbow Trout	Oncorhynchus mykiss	Metal studied with hardness as a modifier
		Chinook Salmon	Oncorhynchus tshawytscha
36	Wood, CM, Farrell, AP, and Brauner, CJ. 2012. Fish Physiology: Homeostasis and toxicology of non-essential metals, Volume 31B. Academic Press (Elsevier), New York, USA. 528pp.	Review text	Review text	No endpoint available
37	Wood, CM, Farrell, AP, and Brauner, CJ. 2012. Fish Physiology: Homeostasis and toxicology of essential metals, Volume 31A. Academic Press (Elsevier), New York, USA. 520pp.	Review text	Review text	No endpoint available
38	Hamiton, SJ, and Buhl, KJ. 1990. Acute toxicity of boron, molybdenum, and selenium to fry of chinook salmon and coho salmon. Archives of Environmental Contamination and Toxicology, 19:366-373.	Chinook Salmon	Oncorhynchus tshawytscha	Metal studied with salinity as a modifier
		Coho Salmon	Oncorhynchus kisutch
39	Reed, P, and Evans, R. 1981. Acute toxicity of chlorides, sulfates, and total dissolved solids to some fishes in Illinois. Illinois Department of Energy and Natural Resources, Illinois, USA. 51 pp.	Largemouth Bass	Micropterus salmoides	Salinity studied
		Bluegill	Lepomis marcochirus
		Channel Catfish	Ictalurus punctatus
40	Banks, D, Younger, PL, Amesen, RT, Iversen, ER, and Banks, SB. 1997. Mine-water chemistry: the good, the bad, and the ugly. Environmental Geology, 32(3): 157-174.	Review paper	Review paper	No endpoint available
41	Bernhardt, ES, and Palmer, MA. 2011. The environmental costs of mountaintop mining valley fill operations for aquatic ecosystems of the Central Appalachians. Annals of the New York Academy of Sciences, 1233: 39-57.	Review paper	Review Paper	No endpoint available
42	Kuchapski, KA, and Rasmussen, JB. 2015. Surface coal mining influences on macroinvertebrate assemblages in streams of the Canadian rocky mountains. Environmental Toxicology and Chemistry, 34(9): 2138-2148.	Roundworms	Nematoda	No endpoint available
		Water mites	Hydrachnidia
		Mayflies	Ephemeroptera
		Stoneflies	Plecoptera
		Caddisflies	Trichoptera
		True Flies	Diptera
43	Lindberg, TT, Bernhardt, ES, Beir, R, Helton, AM, Merola, RB, Vengosh, A, and Di Giulio, RT. Cumulative impacts of mountaintop mining on an Appalachian watershed. Proceedings of the National Academy of Sciences, 108(52): 20929-20934.	Review paper	Review paper	No endpoint available
44	Masnado, RG, Geis, SW, and Sonzogni, WC. 1995. Comparative acute toxicity of a synthetic mine effluent to Ceriodaphnia dubia, larval fathead minnow and the freshwater mussel Anodonta imbecilis. Environmental Toxicology and Chemistry, 14(11): 1913-1920.	Water Flea	Ceriodaphnia dubia	No endpoint available
		Fathead Minnow	Pimephales promelas
		Paper Floater Mussel	Anodonta imbecilis
45	Merricks, TC, Cherry, DS, Zipper, CE, Currie, RJ, Valenti, TW. 2007. Coal-mine hollow fill and settling pond influences on headwater streams in Southern West Virginia, USA. Environmental Monitoring and Assessment, 129: 359-378.	Water Flea	Daphnia magna	No endpoint available
		Asian Clams	Corbicular fluminea
		Water Flea	Ceriodaphnia dubia
46	Pond, GJ, Passmore, ME, Borsuk, FA, Reynolds, L, and Rose, CJ. 2008. Downstream effects of mountaintop coal mining: comparing biological conditions using family- and genus-level macroinvertebrate biossessment tools. Journal of the North American Benthological Society, 27(3): 717-737.	Flatworms	Turbellaria	No endpoint available
		Roundworms	Nematoda
		Water Mites	Hydracarina
		Eathworms	Oligochaeta
47	Puttaswamy, N, and Liber, K. 2011. Identifying the causes of oil sands coke leachate toxicity to aquatic invertebrates. Environmental Toxicology and Chemistry, 30(11): 2576-2585.	Water Flea	Ceriodaphnia dubia	No endpoint available
48	Rikard, M, and Kunkle, S. 1990. Sulfate and conductivity as field indicators for detecting coal-mining pollution. Environmental Monitoring and Assessment, 15: 49-58.	Synthesis paper	Synthesis paper	No endpoint available
49	Palmer, MA, Bernhardt, ES, Schlesinger, WH, Eshleman, KN, Foufoula-Georgiou, E, Hendryx, MS, Lemly, AD, Likens, GE, Loucks, OL, Power, ME, White, PS, and Wilcock, PR. 2010. Mountiantop mining consequences. Science, 327: 148-149.	Synthesis paper	Synthesis paper	No endpoint available
50	Sinclair, A, Taylor, K, van Dam, R, and Hogan, A. 2014. Site-specific water quality guidelines: 2. Development of a water quality regulation framework for pulse exposures of mine water discharges at a uranium mine in northern Australia. Environmental Science and Pollution Research, 21: 131-140.	Regulatory document	Regulatory document	No endpoint available
51	Soucek, DJ, Schmidt, TS, and Cherry, DS. 2001. In situ studies with Asian clams (Corbicula fluminea) detect acid mine drainage and nutrient inputs in low-order streams. Canadian Journal of Fisheries and Aquatic Sciences, 58: 602-608.	Asian Clams	Corbicular fluminea	No endpoint available
52	Timpano, AJ, Schoenholtz, SH, Soucek, DJ, and Zipper, CE. 2015. Salinity as a limiting factor for biological condition in mining-influenced Central Appalachian headwater streams. Journal of the American Water Resources Association, 51(1): 240-250.	Field Survey	Field Survey	No endpoint available
53	Tiwary, RK. 2001. Environmental impact of coal mining on water regime and its management. Water, Air, and Soil Pollution, 132: 185-199.	Synthesis paper	Synthesis paper	No endpoint available
54	Lasier, PT, Winger, PV, and Hardin, IR. 2006. Effects of hardness and alkalinity in culture and test water on reproduction of Ceriodaphina dubia. Environmental Toxicology and Chemistry, 25(10): 2781-2786.	Water Flea	Ceriodaphnia dubia	No endpoint available
55	Martins, GB, Tarouco, F, Rosa, CE, and Robaldo, RB. 2017. The utilization of sodium bicarbonate, calcium carbonate of hydroxide in biofloc systems: water quality, growth performance and oxidative stress of Nile tilapia (Oreochromis niloticu).Aquaculture, 468: 10-17.	Nile Tilapia	Oreochromis niloticu	No endpoint available
56	Alstad, NEW, Skardal, L, and Hessen, DO. 1999. The effect of calcium concentration on the calcification of Daphina magna. Limnology and Oceanography, 44(8): 2011-2017.	Water Flea	Daphina magna	No endpoint available
57	Asaeda, T, Jayasanka Senavirathna, MDH, Kaneko, Y, and Rashid, MH. 2014. Effect of calcium and magnesium on the growth and calcite encrustation of Chara fibrosa. Aquatic Botany, 113: 100-106.	Chara	Chara fibrosa	No endpoint available
58	Boycott, AE. 1934. The habitats of freshwater mollusca in Britain. Journal of Ecology, 22: 116-186.	Review paper	Review paper	No endpoint available
59	Brown, DJA. 1982. The effects of pH and calcium on fish and fisheries. Water, Air, and Soil Pollution, 18: 343-351.	Synthesis paper	Synthesis paper	No endpoint available
60	Brown, DD. 1964. RNA synthesis during amphibian development. Journal of Experimental Zoology, 157: 101-114.	Leopard Frog	Rana pipiens	No endpoint available
61	Chambers, PA, Prepas, EE, Ferguson, ME, Serediak, M, Guy, M, and Holst, M. 2001. The effects of lime addition on aquatic macrophytes in hard water: in situ and microcosm experiments. Freshwater Biology, 46: 1121-1138.	Fennel Pondweed	Potamogeton pectinatus	No endpoint available
		Richardson's Pondweed	Polamogeton richardsonii
		Northern Water-Milfoil	Myriophyllum exalbescens
		Ivy-Leaved Duckweed	Lemna trisulca
62	Cripps, MC, and Nakamura, RM. 1979. Inhibition of growth of Macrobrachium rosenbergii by calcium carbonate water hardness. Journal of the World Aquaculture Society, 10: 575-580.	Giant River Prawn	Macrobrachium rosenbergii	No endpoint available
63	Dalesman, S, and Lukowiak, K. 2010. Effect of acute exposure to low environmental calcium on respiration and locomotion in Lymnaea stagnalis (L.). The Journal of Experimental Biology, 213: 1471-1476.	Great Pond Snail	Lymnaea stagnalis	No endpoint available
64	Harrison, AD, Nduku, W, and Hooper, ASC. 1966. The effects of high magnesium-to-calcium ratio on the egg-laying rate of an aquatic planorbid snail, Biomphalaria pfeifferi. Annals of Tropical Medicine and Parasitology, 60: 212-214.	Biomphalaria	Biomphalaria pfeifferi	No endpoint available
65	Hessen, DO, Alstad, NEW, and Skardal, L. 2000. Calcium limitation in Daphnia magna. Journal of Plankton Research, 22(3): 553-568.	Water Flea	Daphina magna	No endpoint available
66	Huebert, DB, and Shay, JM. 1991. The effect of external phosphorus, nitrogen and calcium on the growth of Lemna trisulca. Aquatic Botany, 40: 175-183.	Ivy-Leaved Duckweed	Lemna trisulca	No endpoint available
67	Mackie, GJ, and Flippance, LA. 1983. Intra- and interspecific variations in calcium content of freshwater mollusca in relation to calcium content of the water. Journal of Molluscan Studies, 49: 204-212.	Marsh Pond Snail	Lymnaea palustris	No endpoint available
		Great Pond Snail	Lymnaea stagnalis
		Tadpole Physa	Physella gyrina
		Two-Ridge Rams Horn Snail	Heliosoma anceps
		Rams Horn Snail	Heliosoma trivolvis
		Rams Horn Snail	Gyraulus parvus
		Rams Horn Snail	Gyraulus hirsutus
		Mud Amnicola	Amnicola limosa
		Campeloma Spire Snail	Cincinnatia cincinnatiensis
		Three-Ridge Valvata	Valvata tricarinata
		Pointed Campeloma	Campeloma decisum
		Lake Fingernail Clam	Musculium lacustre
		Pond Fingernail Clam	Musculium securis
		Long Fingernail Clam	Musculium transversum
		Adam Peaclam	Pisidium adamsi
		Caserta Pea Mussel	Pisidium casertanum
		Ridgedbeak Peaclam	Pisidium compressum
		Rusty Peaclam	Pisidium ferrugineum
		Shining Peaclam	Pisidium nitidum
		Triangular Peaclam	Pisidium variabile
		River Fingernail Clam	Sphaerium fabale
		Rhomboid Fingernailclam	Sphaerium rhomboideum
		Grooved Fingernail Clam	Sphaerium simile
		Striated Fingernail Clam	Sphaerium striatinum
		Giant Floater	Anodonta grandis grandis
		Eastern Elliptio	Elliptio complanata
		Eastern Lampmussel	Lampsilis radiata radiata
68	Mellina, E, and Rasmussen, JB. 1994. Patterns in the distribution and abundance of zebra mussel (Dreissena polymorpha) in rivers and lakes in relation to substrate and other physicochemical factors. Canadian Journal of Fisheries and Aquatic Sciences, 51: 1024-1036.	Zebra Mussel	Dreissena polymorpha	No endpoint available
69	Meyran, JC. 1997. Impact of water calcium on the phenotypic diversity of alpine populations of Gammarus fossarum. Ecology, 78(5): 1579-1587.	Amphipod	Gammarus fossarum	No endpoint available
70	Økland, KA, and Økland, J. 1985. Factor interaction influencing the distribution of the freshwater "shrimp" Gammarus. Oecologia, 66: 364-367.	Freshwater Shrimp	Gammarus lacustris	No endpoint available
71	Prepas, EE, Pinel-Alloul, B, Chambers, PA, Murphy, TP, Reedyk, S, Sandland, G, and Serediak, M. 2001. Lime treatment and its effects on the chemistry and biota of hardwater eutrophic lakes. Freshwater Biology, 46: 1049-1060.	Ecosystem Manipulation	Ecosystem Manipulation	No endpoint available
72	Prouse, AE, Hogan, AC, Harford, AJ, Van Dam, RA, and Nugegooda, D. 2015. Hydra viridissima (green Hydra) rapidly recovers from multiple magnesium pulse exposures. Environmental Toxicology and Chemistry, 34(8): 1734-1743.	Green Hydra	Hydra viridissima	No endpoint available
73	Ravera, O, Cenci, R, Beone, GM, Dantas, M, and Lodigiani, P. 2003. Trace element concentration in freshwater mussels and macrophytes as related to those in their environment. Journal of Limnology, 62: 61-70.	Field Survey	Field Survey	No endpoint available
74	Riessen, HP, Linley, RD, Altshuler, I, Rabus, M, Söllradl, T, Clausen-Schaumann, H, Laforsch, C, and Yan, ND. 2012. Changes in water chemistry can disable plankton prey defenses. Proceedings of the National Academy of Science, 109(38): 15377-15382.	Water Flea	Daphnia pulex	No endpoint available
75	Rodgers, DW. 1984. Ambient pH and calcium concentration as modifiers of growth and calcium dynamics of brook trout, Salvelinus fontinalis. Canadian Journal of Fisheries and Aquatic Sciences, 41(12): 1774-1780.	Brook Trout	Salvelinus fontinalis	No endpoint available
76	Rukke, NA. 2002. Tolerance to low ambient calcium shows inter-population differences in Daphnia galeata. Journal of Plankton Research, 24(5): 527-531.	Water Flea	Daphnia galeata	No endpoint available
77	Sadler, K, and Lynam, S. 1986. Some effects of low pH and calcium on the growth and tissue mineral content of yearling brown trout, Salmo trutta. Journal of fish biology, 29: 313-324.	Brown Trout	Salmo trutta	No endpoint available
78	Seals, C, Kempton CJ, and Tomasso, Jr, JR, Smith, TIJ. 1994. Environmental calcium does not affect production or selected characteristics of sunshine bass reared under normal culture conditions. The Progressive Fish-Culturist, 56: 269-272.	Sunshine Bass	Morone chrysops X Morone saxatilis	No endpoint available
79	Sutcliffe, DW, and Carrick, TR. 1973. Studies on mountain streams in the english lake district I. pH, calcium and the distribution of invertebrates in the River Duddon Freshwater Biology, 3: 437-462.	Review Paper	Review paper	No endpoint available
80	Tavabe, KR, and Rafiee, G, Shoeiry, MM, Houshandi, S, Frinsko, M, Danials, H. 2015. Effects of water hardness and calcium: magnesium ratios on reproductive and offspring quality of Macrobrachium rosenbergii. Journal of the World Aquaculture Society, 46(5): 519-530.	Giant River Prawn	Macrobrachium rosenbergii	No endpoint available
81	Wooldridge, CR, and Wooldridge, DP. 1969. Internal damage in an aquatic beetle exposed to sublethal concentrations of inorganic ions. Annals of the Entomological Society of America, 62(4): 921-922.	Water Scavenger Beetle	Tropisternus lateralis nimbatus	No endpoint available
82	Yamamoto, T. 1954. Physiological studies on fertilization and activation of fish egg. Experimental Cell Research, 6: 56-68.	Medaka	Oryzias latipes	No endpoint available
83	Young, JO. 1975. Preliminary field and laboratory studies on the survival and spawning of several species of gastropoda in calcium-poor and calcium-rich waters. Proceeding of the Malacological Society of London, 41: 429-437.	River Limpet	Ancylus fluviatilis	No endpoint available
		Moss Bladderr Snail	Aplexa hypnorum
		New Zealand Mudsnail	Potamopyrgus jenkinsi
		Marsh Pond Snail	Lymnaea palustris
		Wandering Pond Snail	Lymnaea peregra
		Common Bladder Snail	Physa fontinalis
		White Ram's Horn Snail	Planorbis albus
		Ram's Horn Snail	Planorbis leucostoma
		Faucet Snail	Bithynia tentaculata
		Great Pond Snail	Lymnaea stagnalis
		Keeled Ram's Horn Snail	Planorbis carinatus
		The Great Ram's Horn Snail	Planorbarius corneus
		Ram's Horn Snail	Planorbis vortex
		River Snail	Viviparus viviparus
84	Baldisserotto, B. 2011. Water pH and Hardness affect growth of freshwater teleosts. Revista Brasileira de Zootecnia, 40: 138-144.	Review Paper	Review Paper	No endpoint available
85	Barnes, ME, Gabel, AC, Durben, DJ, Hightower, TR, and Berger, TJ. 2004. Changes in water hardness influence colonization of Saprolegnia diclina. North American Journal of Aquaculture, 66: 222-227.	Water mould	Saprolegnia diclina	No endpoint available
86	Blanksma, C, Eguia, B, Lott, K, Lazorchak, JM, Smith, ME, Wratschko, M, Dawson, TD, Elonen, C, Kahl, M, Schoenfuss, HL. 2009. Effects of water hardness on skeletal development and growth in juvenile fathead minnows. Aquaculture, 286: 226-232.	Fathead Minnow	Pimephales promelas	No endpoint available
87	Brown, JH, Wickins, JF, and MacLean, MH. 1991. The effect of water hardness on growth and carapace mineralization of juvenile freshwater prawns, Macrobrachium rosenbergii de Man. Aquaculture, 95: 329-345.	Giant River Prawn	Macrobrachium rosenbergii	No endpoint available
88	Carneiro, RL, Pacheco, ABF, and Azevedo, SMHO. 2013. Growth and saxitoxin production by Cylindrospermopsis raciborskii (Cyanobacteria) correlate with water hardness. Marine Drug, 11: 2949-2963. DOI: 10.3390/md11082949.	Cyanobacterium	Cylindrospermopsis raciborskii	No endpoint available
89	Copatti, CE, de Oliveira Garcia, L, da Cunha, MA, and Baldisserotto, B, and Kochhann, D. 2011. Interaction of water hardness and pH on growth of silver catfish, Rhamdia quelen, juveniles. Journal of the World Aquaculture Society, 42(4): 580-585.	Silver Catfish	Rhamdia quelen	No endpoint available
90	Czekała, J, Jezierska, A, Krzywosądzki, A. 2011. Calcium and magnesium content in treated waters and their total hardness. Journal of Elementology, s: 169-176. DOI: 10.5601/jelem.2011.16.2.01	Water Analysis Only	Water Analysis Only	No endpoint available
91	Graham, MS, Wood, CM, and Turner, JD. 1982. The physiological responses of the rainbow trout to strenuous exercise: interaction of water hardness and environmental acidity. Canadian Journal of Zoology, 60: 3153-3164.	Rainbow Trout	Oncorhynchus mykiss	No endpoint available
92	Hincks, SS, and Mackie, GL. 1997. Effects of pH, calcium, alkalinity, hardness, and chlorophyll on the survival, growth, and resproduction success of zebra mussel (Dreissena polymorpha) in Ontario lake. Canadian Journal of Fisheries and Aquatic Sciences, 54: 2049-2057.	Zebra Mussel	Dreissena polymorpha	No endpoint available
93	James, R, and Sampath, K. 1998. Effects of feed and water quality (hardness) on growth in red swordtail Xiphophorus hellerii fry. Indian Journal of Fisheries, 45(3): 307-313.	Red Swordtail	Xiphophorus helleri	No endpoint available
94	Markich, SJ, Jeffree, RA. 1994. Absorption of divalent trace metals as analogues of calcium by Australian freshwater bivalves: an explanation of how water hardness reduces metal toxicity. Aquatic Toxicology, 29: 257-290.	Depressed Mussel	Hyridella depressa	No endpoint available
95	Markich, SJ, Brown, PL, Batley, GE, Apte, SC, and Stauber, JL. 2001. Incorporating metal speciation and bioavailability into water quality guidelines for protecting aquatic ecosystems. Australasian Journal of Ecotoxicology, 7: 109-122.	WQG Derivation	WQG Derivation	No endpoint available
96	Olivera-Filho, EC, Caixeta, NR, Simplício, NCS, Sousa, SR, Aragão, TP, and Muniz, DHF. 2014. Implications of water hardness in ecotoxicological assessments for water quality regulatory purposes: a case study with the aquatic snail Biomphalaria globrata(Say, 1818). DOI: http://dx.doi.org/10.1590/1519-6984.24212	Biomphalaria	Biomphalaria glabrata	No endpoint available
97	Rach, JJ, Sass, GG, Luoma, JA, and Gaikowski, MP. 2010 Effects of water hardness on size and hatching success of silver carp eggs. North American Journal of Fisheries Management, 30: 230-237.	Silver Carp	Hypophthalmichthys molitrix	No endpoint available
98	Roberts, SD, and Powell, MD. 2003. Reduced total hardness of fresh water enhances the efficacy of bathing as a treatment for amoebic gill disease in atlantic salmon, Salmo salar L. Journal of Fish Diseases, 26: 591-599.	Atlantic Salmon	Salmo salar	No endpoint available
99	Vasquez, OE, Rouse, DB, and Rogers, WA. 1989. Growth response of Macrobrachium rosenbergii to different levels of hardness. Journal of the World Aquaculture Society, 20(2): 90-92.	Giant River Prawn	Macrobrachium rosenbergii	No endpoint available
100	Winner, RW. 1989. An evaluation of some myths concerning the culture of daphnids. Aquatic Toxicology, 14: 323-330.	Water Flea	Daphnia magna	No endpoint available
101	Relyea, RA, and Hintz, WD. 2017. Impacts of road deicing salts on the early-life growth and deveopment of a stream salmonid: Salt type matters. Environmental Pollution, 223: 409-415.	Rainbow Trout	Oncorhynchus mykiss	No endpoint available
102	Wurts, WA, and Durborow, RM. 1992. Interactions of pH, carbon dioxide, alkalinity and hardness in fish ponds. SRAC Publication No. 464. Southern Regional Aquaculture Center, Mississippi, USA. 4pp.	Review	Review	No endpoint available
103	Yeager, DM. 1994. A system for increasing water hardness in culture water at a soft-water striped bass production facility. The Progressive Fish-Culturist, 56: 56-57.	Striped Bass	Morone saxatilis	No endpoint available
104	Douglas, WS, and Horne, MT. 1997.The ineractive effects of essential ions and salinity on the survival of Mysidopsis bahia in 96-H acute toxicity tests of efluents discharged to marine and estuarine receiving waters. Environmental Toxicology and Chemistry, 16(10): 1996-2001.	Opossum Shrimp	Mysidopsis bahia	Salinity or saline species studied
105	Dziewulska, K, and Domagała, J. 2013. Effect of pH and cation concentrations on spermatozoan motility of sea trout (Salmo trutta m. trutta L.). Theriogenology, 79(1): 48-58.	Sea Trout	Salmo trutta morpha trutta	Salinity or saline species studied
106	Kline, ER, and Stekoll, MS. 2000. The role of calcium and sodium in toxicity of an effluent to mysid shrimp (Mysidopsis bahia). Environmental Toxicology and Chemistry, 19(1): 234-241.	Mysid Shrimp	Mysidopsis bahia	Salinity or saline species studied
107	Pfeiler, E. 1997. Effect of Ca²+ on survival and development of metamorphosing bonefish (Albula sp.) leptocephali. Marine Biology, 127: 571-578.	Bonefish	Albula sp.	Salinity or saline species studied
108	Pillard, DA, DuFresne, DL, and Mickley, MC. 2002. Development and validation of models predicting the toxicity of major seawater ions to the mysid shrimp, Americamysis bahia. Environmental Toxicology and Chemisty, 21(10): 2131-2137.	Mysid Shrimp	Americamysis bahia	Salinity or saline species studied
109	Pillard, DA, DuFresne, DL, Caudle, DD, Tietge, JE, and Evans, JM. 2000. Predicting the toxicity of major ions in seawater to mysid shrimp (Mysidopsis bahia), sheephead minnow (Cyprinodon variegatus), and inland silverside minnow (Menidia beryllina). Environmental Toxicology and Chemistry, 19(1): 183-191.	Mysid Shrimp	Mysidopsis bahia	Salinity or saline species studied
		Sheephead Minnow	Cyprinodon variegatus
		Inland Silverside Minnow	Menidia beryllina
110	Tytler, P, and Ireland, J. 1993. The influence of temperature, salinity and external calcium on diffusional permeability of the eggs of turbot (Scophthalmus maximus). Aquaculture, 115: 335-345.	Turbot	Scophthalmus maximus	Salinity or saline species studied
111	Brix, KV, Gerdes, R, and Grosell, M. 2010. Thiocyanate, calcium and sulfate as causes of toxicity to Ceriodaphnia dubia in a hard rock mining effluent. Ecotoxicology and Environmental Safety, 73: 1646-1652.	Water Flea	Ceriodaphnia dubia	No endpoint available
112	Camargo, JA, and Tarazona, JV. 1991. Short-term toxicity of fluoride ion (F-) in soft water to rainbow trout and brown trout. Chemosphere, 22(5-6): 605-611.	Rainbow Trout	Oncorhynchus mykiss	No endpoint available
		Brown Trout	Salmo trutta morpha fario
113	Camargo, JA. 2003. Fluoride toxicity to aquatic organisms: A review. Chemosphere, 50: 251-264.	Review Paper	Review paper	No endpoint available
114	Ferreina, FW, and Da Cunha, RB. 2013. The survival and growth of juvenile silver catfish, Rhamdia quelen, exposed to different NH₃ and hardness levels. Journal of the World Aquaculture Society, 44(2): 293-299.	Silver Catfish	Rhamdia quelen	No endpoint available
115	Göthe, L, Söderberg, H, Sjölander, E, and Nohrstedt, H. 1993. Effects on water chemistry, benthic invertebrates, and brown trout following forest fertilization in Central Sweden. Scaninavian Journal of Forest Research, 8: 81-93.	Brown Trout	Salmo trutta	No endpoint available
116	Hessen, DO, and Rukke, NA. 2000. UV radiation and low calcium as mutual stressors for Daphnia. Limnology and Oceanography, 45(8): 1834-1838.	Water Flea	Daphnia magna	No endpoint available
		Water Flea	Daphnia tenebrosa
117	Kroupova, H, Machova, J, and Svobodova, Z. 2005. Nitrite influence on fish: A review. Veterinarni Medicina, 50: 461-471.	Review Paper	Review paper	No endpoint available
118	Versteeg, DJ, Stalmans, M, Dyer, SD, and Janssen, C. 1997. Ceriodaphnia and Daphnia: A comparison of their sensitivity to xenobiotics and utility as a test species. Chemosphere, 34(4): 869-892.	Water Flea	Ceriodaphnia dubia	No endpoint available
		Water Flea	Daphnia magna
		Water Flea	Daphnia pulex
119	Cowgill, UM, and Milazzo, DP. 1989. New approach to the seven-day Ceriodaphnia dubia test with additional comments pertaining to the same test for Daphnia magna. Bulletin of Environmental Contamination and Toxicology, 42: 749-753.	Water Flea	Ceriodaphnia dubia	No endpoint available
		Water Flea	Daphnia magna
120	Green, TJ, Powell, MD, Harris, JO, and Butler, R. 2005. Effects of dissolved organic carbon and hardness in freshwater used to treat amoebic gill disease. Aquaculture Research, 36: 398-404.	Amoeba	Neoparamoeba sp.	No endpoint available
121	Lewis, MA, and Maki, AW. 1981. Effects of water hardness and diet on productivity of Daphnia magna Straus. in laboratory culture. Hydrobiologia, 85: 175-179.	Water Flea	Daphnia magna	No endpoint available
122	Shuter, BJ, Ihssen, PE, Wales, DL, and Snucins, EJ. 1989. The effects of temperature, pH and water hardness on winter starvation to young-of-the-year smallmouth bass, Micropterus dolomieui Lacépède. Journal of Fish Biology, 35: 765-780.	Smallmouth Bass	Micropterus dolomieui	No endpoint available
123	Tessier, AJ, and Horwitz, RJ. 1990. Influence of water chemistry on size structure of zooplankton assemblages. Canadian Journal of Fisheries and Aquatic Sciences, 47: 1937-1943.	Field Survey	Field Survey	No endpoint available
124	Zajdlik, BA. 2015. A statistical evaluation of the safety factor and species sensitivity distribution approaches to deriving environmental quality guidelines. Integrated Environmental Assessment and Management, 12(2): 380-387.	Modelling paper	Modelling paper	No endpoint available
125	Azan, SSE, Arnott, SE, and Yan, ND. 2015. A review of the effects of Bythotrephes longimanu and calcium decline on zooplankton communities- can interactive effects be predicted? Environmental Reviews, 23: 395-413.	Review paper	Review paper	No endpoint available
126	Bagarinao, T. 1992. Sulfide as an environmental factor and toxicant: Tolerance and adaptations in aquatic organisms. Aquatic Toxicology, 24: 21-62.	Review paper	Review paper	No endpoint available
127	Boyd, CE, Tucker, CS, Somridhivej, B. 2016. Alkalinity and hardness: Critical but elusive concepts in aquaculture. Journal of the World Aquaculture Society. 47(1): 6-41. DOI: 10.1111/jwas.12241.	Review paper	Review paper	No endpoint available
128	Cairns, A, and Yan, N. 2009. A review of the influence of low ambient calcium concentrations on freshwater daphniids, gammarids, and crayfish. Environmental Reviews, 17: 67-79. DOI:10.1139/A09-005	Review paper	Review paper	No endpoint available
129	Chapman, PM, Fairbrother, A, and Brown, D. 1998. A critical evaluation of safety (uncertainty) factors for ecological risk assessment. Environmental Toxicology and Chemistry, 17(1): 99-108.	Review paper	Review paper	No endpoint available
130	Clark, EW. 1958. A review of literature on calcium and magnesium in insects. Annals of the Entomological Society of America, 51: 142-154.	Review paper	Review paper	No endpoint available
131	Cohen, AN. 2001 A review of zebra mussels' environmental requirements. San Francisco Estuary Institute, California, USA. 33pp.	Review	Review	No endpoint available
132	CCME. 2011. Canadian water quality guidelines for the protection of aquatic life - Chloride. Canadian Council of Ministers of the Environment, Quebec, Canada. 16 pp.	WQG	WQG	No endpoint available
133	Døving, KB. 1991. Assessment of animal behaviour as a method to indicate environmental toxicity. Comparative Biochemistry and Physiology Part C: Comparative Pharmacology, 100(1-2): 247-252.	Review paper	Review paper	No endpoint available
134	Ebel, H, Günther, T. 1980. Magnesium metabolism: A review. Journal of Clinical Chemistry and Clinical Biochemistry, 18: 257-270.	Review paper	Review paper	No endpoint available
135	Evans, DH. 1975. Ionic exchange mechanisms in fish gills. Comparative Biochemistry and Physiology Part A: Physiology, 51(3): 491-495.	Review paper	Review paper	No endpoint available
136	Mordes, JP, and Wacker, WEC. 1978. Excess Magnesium. Pharmacological Reviews, 29(4): 273-300.	Review paper	Review paper	No endpoint available
137	Freeman, L. 1953. A standardized method for determining toxicity of pure compounds to fish. Sewage and Industrial Wastes, 25(7): 845-848.	Review Paper	Review paper	No endpoint available
138	Goodfellow, WL, Ausley, LW, Burton, DT, Denton, DL, Dorn, PB, Grothe, DR, Heber, MA, Norberg-King, TJ, and Rodgers Jr, JH. 2000. Major ion toxicity in efluents: A review with permitting recommendations. Environmental Toxicology and Chemistry, 19(1): 175-182.	Review Paper	Review paper	No endpoint available
139	Hart, BT, Bailey, P, Edwards, R, Hortle, K, James K, McMahon, A, Meredith, C, and Swadling, K. 1991. A review of the salt sensitivity of the Australian freshwater biota. Hydrobiologia, 210. 105-144.	Review paper	Review paper	No endpoint available
140	Howells, GD, Brown, DJA, and Sadler, K. 1983. Effect of acidity, calcium, and aluminium on fish survival and productivity - a review. Journal of the Science of Food and Agriculture, 34: 559-570.	Review paper	Review paper	No endpoint available
141	Hughes, GM, and Morgan, M. 1937. The structure of fish gills in relation of their respiratory function. Biological Reviews, 48: 419-475.	Review paper	Review paper	No endpoint available
142	Kaneko, T, Shiraishi, K, Katoh, F, Hasegawa, S, and Hiroi, J. 2002. Chloride cells during early life stages of fish and their functional differentiation. Fisheries Science, 68: 1-9.	Review paper	Review paper	No endpoint available
143	Hardwick, LL, Jones, MR, Brautbar, N, and Lee, DB. 1991. Magnesium absorption: Mechanisms and the influence of vitamin D, calcium, and phosphate. Journal of Nutrition, 121(1): 13-23.	Review Paper	Review paper	No endpoint available
144	Patil, PN, Sawant, DV, and Deshmukh, RJ. 2012. Physico-chemical parameters for testing of water - A review. International Journal of Environmental Sciences, 3(3): 1194-1207.	Review paper	Review paper	No endpoint available
145	Sirker, AA, Rhodes, A, Grounds, RM, and Bennett, ED. 2002. Acid-base physiology: The 'traditional' and the 'modern' approaches. Anaesthesia, 57(4): 348-356.	Review paper	Review paper	No endpoint available
146	Sorensen, DL, McMarthy, MM, Middlebrooks, EJ, and Porcella, DB. 1977. Suspended and dissolved solids effects on freshwater biota: A review. Utah Water Research Laboratory, Utah State University, Utah, USA. 65pp.	Review Paper	Review paper	No endpoint available
147	van Dam, RA, Humphrey, CL, Harford, AJ, Sinclair, A, Jones, DR, Davies, S, and Storey, AW. 2014. Site-specific water quality guidelines: 1. Derivation approaches based on physicochemical, ecotoxicological and ecological data. Environmental Science and Pollution Research, 21: 118-130.	Review paper	Review paper	No endpoint available
148	Weber-Scannell, PK, and Duffy, LK. 2007. Effects of total dissolved solids on aquatic organisms: A review of literature and recommentation for Salmonid species. American Journal of Environmental Sciences, 3(1): 1-6.	Review paper	Review paper	No endpoint available
149	Welsh, PG, Lipton, J, and Chapman, GA. Evaluation of water-effect ratio methodology for establishing site-specific water quality criteria. Environmental Toxicology and Chemistry, 19(6): 1616-1623.	Review paper	Review paper	No endpoint available
150	Adhikari, S, Chaurasia, VS, Ahmad Naqvi, A, and Pillai, BR. 2007. Survival and growth of Macrobrachium rosenbergii (de Man) juvenile in relation to calcium hardness and bicarbonate alkalinity. Turkish Journal of Fisheries and Aquatic Sciences, 7: 23-26.	Giant River Prawn	Macrobrachium rosenbergii	No endpoint available
151	Farag, AM, and Harper, DD. 2014. The chronic toxicity of sodium bicarbonate, a major component of coal bed natural gas produced waters. Environmental Toxicology and Chemistry, 33(3): 532-540.	Fathead Minnow	PImephales promelas	No endpoint available
		White Suckers	Catostomus commersoni
		Water Flea	Ceriodaphnia dubia
		Fatmucket Clam	Lampsilis siliquoidea
152	Farag, AM, Harper, DD, and Skaar, D. 2014. In situ and laboratory toxicity of coalbed natural gas produced waters with elevated sodium bicarbonate. Environmental Toxicology and Chemistry, 33(9): 2086-2093.	Fathead Minnow	Pimephales promelas	No endpoint available
		Pallid Sturgeon	Scaphirhynchus albus
153	Ashforth, D, Yan, ND. 2008. The interactive effects of calcium concentration and temperature on the survival and reproduction of Daphnia pulex at high and low food concentration. Limnology and Oceanography, 53(2): 420-432.	Water Flea	Daphnia pulex	No endpoint available
154	Brown, DJA, and Lynam, S. 1981. The effect of sodium and calcium concentrations on the hatching of eggs and the survival of the yolk sac fry of brown trout, Salmo trutta L. at low pH. Journal of Fish Biology, 19: 205-211.	Brown Trout	Salmo trutta	No endpoint available
155	Capelli, GM, and Magnuson, JJ. 1983. Morphoedaphic and biogeographic analysis of crayfish distribution in Northern Wisconsin. Journal of Crustacean Biology, 3(4): 548-564.	Field Survey	Field Survey	No endpoint available
156	Chatakondi, NG, and Torrans, EL. 2012. The effect of calcium hardness on hatching success of channel catfish x blue catfish hybrid catfish eggs. North American Journal of Aquaculture, 74: 306-309.	Channel Catfish	Ictalurus punctatus	No endpoint available
		Blue Catfish	Ictalurus furcatus
157	Cohen, AN, and Weinstein, A. 2001. Zebra mussel's calcium threshold and implications for its potential distribution in North America. San Francisco Estuary Institute, California, USA. 47pp.	Zebra Mussel	Dreissena polymorpha	No endpoint available
158	Cummins, CP. 1988. Effect of calcium on survival times of Rana temporaria L. embryos at low pH. Functional Ecology, 2: 297-302.	European Common Frog	Rana temporaria	No endpoint available
159	Davis, CJ, Ruhmann, EK, Acharya, K, Chandra, S, and Jerde, CI. 2015. Successful survival, growth, and reproductive potential of quagga mussels in low calcium lake water: Is there uncertainty of establishment risk? Peer J, 3: e1276. DOI 10.7717/peerj.1276	Quagga Mussel	Dreissena rostriformis bugensis	No endpoint available
160	Edwards, WJ, Babcock-Jackson, L, and Culver, DA. 2000. Prevention of the spread of zebra mussels during fish hatchery and aquaculture activities. North American Journal of Aquaculture, 62: 229-236.	Zebra Mussel	Dreissena polymorpha	No endpoint available
161	Edwards, WJ, Jackson, DA, and Somers, KM. 2016. Effects of declining calcium availability on the survival, growth and calcium content of a freshwater crayfish, Orconectes virilis. Freshwater Biology, 61: 914-922.	Crayfish	Orconectes virilis	No endpoint available
162	Freda, J, and Dunson, WA. 1985. The influence of external cation concentration on the hatching of amphibian embryos in water of low pH. Canadian Journal of Zoology, 63: 2649-2656.	Yellow-Spotted Salamander	Ambystoma maculatum	No endpoint available
		Jefferson Salamander	Ambystoma jeffersonianum
		Wood Frog	Rana sylvatica
		Woodhouse's Toad	Bufo woodhousei
		American Toad	Bufo americanus
163	Fryer, G. 1985. The ecology and distribution of the genus Daphnia (Crustacea: Cladocera) in restrited areas: The pattern in Yorkshire. Journal of Natural History, 19: 97-128.	Water Flea	Daphnia magna	No endpoint available
		Water Flea	Daphnia obtusa
164	Greenaway, P. 1972. Calcium regulation in the freshwater crayfish Austropotamobius pallipes (Lereboullet). I. Calcium balance in the intermoult animal. Journal of Experimental Biology, 57: 471-487.	Crayfish	Austropotamobius pollipes	No endpoint available
165	Greenaway, P. 1974. Calcium balance at the postmoult stage of the freshwater crayfish Austropotamobius pallipes (Lereboullet). Journal of Experimental Biology, 6: 35-45.	Crayfish	Austropotamobius pollipes	No endpoint available
166	Grizzle, JM, and Mauldin II, AC. 1994. Age-related changes in survival of larval and juvenile striped bass in different concentrations of calcium and sodium. Transactions of the American Fisheries Society, 123: 1002- 1005.	Striped Bass	Morone saxatilis	No endpoint available
167	Grizzle, JM, and Mauldin II, AC. 1999. Increased postharvest survival of young white bass and sunshine bass by addition of calcium and sodium chloride to soft water. North American Journal of Aquaculture, 61: 146-149.	White bass	Morone chrysops	No endpoint available
		Sunshine Bass	Morone chrysops X Morone saxatilis
168	Grizzle, JM, Mauldin II, AC, Young, D, and Henderson E. 1985. Survival of juvenile striped bass (Morone saxatilis) and Morone hybrid bass (Morone chrysops x Morone saxatilis) increased by addtion of calcium to soft water. Aquaculture, 46: 167-171.	Striped Bass	Morone saxatilis	No endpoint available
		Morone Hybrid Bass	Morone chrysops X Morone saxatilis
169	Grizzle, JM, Mauldin II, AC, Young, D, and Henderson, E. 1990. Effects of environmental calcium and sodium on postharvest survival of juvenile striped bass. Journal of Aquatic Animal Health, 2(2): 104-108.	Striped Bass	Morone saxatilis	No endpoint available
170	Hammond, KS, Hollows, JW, Townsend, CR, Lokman, PM. 2006. Effects of temperature and water calcium concentration on growth, survival and moulting of freshwater crayfish, Paranephrops zealandicus. Aquaculture 251(2-4): 271-279.	Crayfish	Paranephropa zealandicus	No endpoint available
171	Harvas, M, and Hutchinson, TC. 1982. Aquatic invertebrates from the Smoking Hills, N.W.T.: Effects of pH and metals on mortality. Canadian Journal of Fisheries and Aquatic Sciences, 39: 890-903.	Water Flea	Daphnia middendorffiana	No endpoint available
		Arctic Copepod	Diaptomus arcticus
		Tadpole Shrimp	Lepidurus arcticus
		Fairy Shrimp	Branchinecta paludosa
		Caddisfly	Limnephilus pallens
		Chironomid	Orthocladius (Pogonocladius) consobrinus
		Blood Worm	Chironomus riparius
170	Hessen, DO, Faagfeng, BA, and Andersen, T. 1995. Competition or niche segregation between Holopedium and Daphnia; empirical light on abiotic key parameters. Hydrobiologia, 307(1-3): 253-261.	Field Survey	Field Survey	No endpoint available
171	Hooper, HL, Connon, R, Callaghan, A, Fryer, G, Yarwood-Buchanan, S, Biggs, Muand, SJ, Hutchinson, TH, and Sibly, RM. 2008. The ecological niche of Daphnia magna characterized using population growth rate. Ecology, 89(4): 1015-1022.	Water Flea	Daphina magna	No endpoint available
172	Ketola, HG, Longacre, D, and Greulich, A, Phetterplace, L, and Lashomb, R. 1988. High calcium concentration in water increases mortality of salmon and trout eggs. The Progressive Fish-Culturist, 50(3): 129-135.	Atlantic Salmon	Salmo salar	No endpoint available
		Rainbow Trout	Oncorhynchus mykiss (Salmo gairdneri)
		Brook Trout	Salvelinus fontinalis
173	Luo, S, Wu, B, Xiong, X, and Wang, J. 2016. Original research effects of total hardness and calcium:magnesium ratio of water during early stages of Rare Minnows (Gobiocypris rarus). Comparative Medicine, 66(3): 181-187.	Rare Minnow	Gabiocypris rarus	No endpoint available
174	Martemyanov, VI, and Mavrin, AS. 2012. Threshold environmental concentrations of cations defining the range of roach Rutilus rutilus L. in freshwater reservoirs. Inland Water Biology, 5(1): 91-95.	Caspian Roach	Rutilus rutilus	No endpoint available
175	Martemyanov, VI, and Mavrin, A. 2014. Threshold concentrations of cations in the external environment defining the spread boundaries of the minnow Phoxinus. ВОДА: ХИМИЯ и ЭКОЛОГИЯ, 1 7: 106-111.	Minnow	Phoxinus sp.	In Russian; can't read
176	Martemyanov, VI, and Mavrin, AS. 2012a. Threshold environmental concentrations of cations determining the boundraries of survival of the filamentous alga Spirogyra sp. in freshwater reservoirs. Contemporary Problems of Ecology, 5(3): 250-254. DOI: 10.1134/S1995425512030122	Filamentous Green Alga	Spirogyra sp.	No endpoint available
177	Martemyanov, VI, and Marvin, AS. 2012b. Threshold environmental concentrations of cations defining the range of roach Rutilus rutilus L. in freshwater reservoirs. Inland Water Biology, 5(1): 91-95.	Caspian Roach	Rutilus rutilus	No endpoint available
178	Martemyanov, VI. 2013. Threshold cation concentrations in water determining the range limits of alien gastropod mollusk Lithoglyphus naticoides in the Rybinsk reservoir. Russian Journal of Biological Invasions, 4(1): 60–67. DOI: 10.1134/S2075111713010074.	Gravel Snail	Lithoglyphus naticoides	No endpoint available
179	Martemyanov, VI. 2014. Threshold concentrations of cations in the external environment required for maintenance of the ionic balance between the organism of the invader Elodea canadensis Michaux and fresh water. Russian Journal of Biological Invasions, 5(4): 265–274. DOI: 10.1134/S2075111714040043.	Canadian Pondweed	Elodea canadensis	No endpoint available
180	Miller, JC, and Landesman, R. 1978. Reduction of heavy metal toxicity to Xenopus embryos by magnesium ions. Bulletin of Environmental Contamination and Toxicology, 20: 93-95.	African Clawed Frog	Xenopus laevis	No endpoint available
181	Moss, B. 1973. The influence of environmental factors on the distribution of freshwater algae: An experimental study. Journal of Ecology, 61(1): 157-177.	33 species; refer to paper	34 species; refer to paper	No endpoint available
182	Ohta, T, Niwa, S, and Hiura, T. 2014. Calcium concentration in leaf litter affects the abundance and survival of crustaceans in streams draining warm–temperate forests. Freshwater Biology, 59: 748–760. DOI: 10.1111/fwb.12301.	Japanese Gammarus	Gammarus nipponensis	No endpoint available
183	Rukke, NA. 2002. Effects of low calcium concentrations on two common freshwater crustaceans, Gammarus lacustris and Astacus astacus. Functional Ecology, 16: 357-366.	Freshwater Shrimp	Gammarus lacustris	No endpoint available
		European crayfish	Astacus astacus
184	Seals, C, Kempton, CJ, Tomasso, Jr, JR, and Smith, TIJ. 1994. Environmental calcium does not affect production or selected blood characteristics of sunshine bass reared under normal culture conditions. The Progressive Fish-Culturist, 56: 269-272.	Sunshine Bass	Morone chrysops X Morone saxatilis	No endpoint available
185	Spade, S, and Bristow, B. 1999. Effects of increasing water hardness on egg diameter and hatch rates of striped bass eggs. North American Journal of Aquaculture, 61: 263-265.	Striped Bass	Morone saxatilis	No endpoint available
186	Tucker, CS, and Steeby, JA. 1993. A practical calcium hardness criterion for channel catfish hatchery water supplies. Journal of the World Aquaculture Society, 24(3): 396-401.	Channel Catfish	Ictalurus punctatus	No endpoint available
187	Waller, DL, Fisher, SW, and Dabrowska, H. 1996. Prevention of zebra mussel infestation and dispersal during aquaculture operations. The Progressive Fish-Culturist, 58(2): 77-84.	Zebra Mussel	Dreissena polymorpha	No endpoint available
188	Wright, DA. 1979. Calcium regulation in intermoult Gammarus pulex. Journal of Experimental Biology, 83: 131-144.	Common Freshwater Shrimp	Gammarus pulex	No endpoint available
189	Wright, DA. 1980. Calcium balance in premoult and post-moult Gammarus pulex (Amphipoda). Freshwater Biology, 10: 571-579.	Common Freshwater Shrimp	Gammarus pulex	No endpoint available
190	Wurts, WA, and Stickney, RR. 1989. Responses of red drum (Sciaenops ocellatus) to calcium and magnesium concentrations in fresh and salt water. Aquaculture, 78: 21-35.	Red Drum	Sciaenops ocellatus	No endpoint available
191	Zehmer, JK, Mahon, SA, and Capelli, GM. 2002. Calcium as a limiting factor in the distribution of the amphipod Gammarus pseudolmnaeus. American Midland Naturalist Journal, 148: 350-362. DOI: 10.1674/0003-0031(2002)148[0350:CAALFI]2.0.CO;2	Northern Spring Amphipod	Gammarus pseudolimnaeus	No endpoint available
192	Zuccarelli, MD, and Ingermann, RL. 2007. Calcium-induced quiescence of sperm mortility in the bluegill (Lepomis macrochirus). Journal of Experimental Zoology, 307A: 590-599.	Bluegill	Lepomis marcochirus	No endpoint available
193	Allert, AL, Cole-Neal, CL, and Fairchild, JF. 2012. Toxicity of chloride under winter low-flow conditions in a urban watershed in Central Missouri, USA. Bulletin of Enviromental Contamination and Toxicology, 89: 296-301.	Water Flea	Ceriodaphnia dubia	No endpoint available
194	Celis-Salgadp, MP, Cairns, A, Kim, N, and Yan, ND. 2008. The FLAMES medium: A new, soft-water culture and bioassay medium for Cladocera. Verhandlungen Des Internationalen Verein Limnologie, 30(2): 265-271.	Water Flea	Daphnia pulex	No endpoint available
195	Ciparis, S, Phipps, A, Soucek, DJ, Zipper, CE, and Jones, JW. Effects of environmentally relevant mixtures of major ions on a freshwater mussel. Environmental Pollution, 207: 280-287.	Rainbow mussel	Villosa iris	No endpoint available
196	De March, BGE. 1988. Acute toxicity of binary mixtures of five cations (Cu²⁺,Cd²⁺, Zn²⁺, Mg²⁺, and K⁺) to the freshwater Amphipod Gammarus lacustris (Sars): Alternative descriptive models. Canadian Journal of Fisheries and Aquatic Sciences, 45: 625-633.	Freshwater Amphipod	Gammarus lacustris	No endpoint available
197	Freitas, EC, and Rocha, O. 2011. Acute and chronic effects of sodium and potassium on the tropical freshwater cladoceran Pseudosida ramosa. Ecotoxicology, 20: 88-96.	Tropical Freshwater Cladoceran	Pseudosida ramosa	No endpoint available
198	Jones, JRE. 1941. A study of the relative toxicity of anions, with Polycelis nigra as test animal. Journal of Experimental Biology, 18: 170-181.	Flatworm	Polycelis nigra	No endpoint available
199	Pursley, MG, and Wolters, WR. 1994. Effects of total water hardness and chloride on survival, growth, and feed conversion of juvenile red drum Sciaenops ocellatus. Journal of the World Aquaculture Society, 25(3): 448-453.	Red Drum	Sciaenops ocellatus	No endpoint available
200	Rowe, L, Berrill, M, Hollett, L, and Hall, RJ. 1989. The effects of short-term laboratory pH depressions on molting, mortality and major ion concentrations in the mayflie Steronema femoratum and Leptophlebia cupida. Hydrobiologia, 184: 89-97.	Mayfly	Stenonema femoratum	No endpoint available
		Mayfly	Leptophlebia cupida
201	Sarkheil, M, Rafiee, G, Mojazi Amiri, B, an Farhangi, M. 2014. Effect of different concentrations of waterborne sodium on the hatching rate and ions content of rainbow trout (Oncorhynchus mykiss). Turkish Journal of Fisheries and Aquatic Sciences, 14: 59-65.	Rainbow Trout	Oncorhynchus mykiss	No endpoint available
202	Sayer, MDJ, Reader, JP, and Dalziel, TRK. 1993. Freshwater acidification: Effects on the early life stages of fish. Reviews in Fish Biology and Fisheries, 3: 95-132.	Review paper	Review paper	No endpoint available
203	Copatti, CE, Garcia, LO, Kochhann, D, Da Cunha, MA, Becker, AG, and Baldisserotto, B. 2011. Low water hardness and pH affect growth and survival of silver catfish juveniles. Ciência Rural, 41(8): 1482-1487.	Silver Catfish	Rhamdia quelen	No endpoint available
204	Giri III, B, and Boyd, CE. 2000. Effects of frequent, small dosed of calcium carbonate on water quality and phytoplankton in channel catfish ponds. North American Journal of Aquaculture, 62: 225- 228.	Channel Catfish	Ictalurus punctatus	No endpoint available
205	Godfrey, EW, and Sanders, GE. 2004. Effects of water hardness on oocyte quality and embryo development in the African clawed frog (Xenopus laevis). American Association for Laboratory Animal Science, 54(2): 170-175.	African Clawed Frog	Xenopus laevis	No endpoint available
206	Gonzal, AC, Aralar, EV, and Pavico, JMF. 1987. The effects of water hardness on the hatching and viability of silver carp (Hypophthalmichthys molitrix) eggs. Aquaculture, 64: 111-118.	Silver Carp	hypophthalmichthys molitrix	No endpoint available
207	Horne, MT, and Dunson, WA. 1995. Effects of low pH, metals, and water hardness on larval amphibians. Archives of Environmental Contamination and Toxicology, 29: 500-505.	Jefferson Salamander	Ambystoma jeffersonianum	No endpoint available
		Wood Frog	Rana sylvatica
208	Kasiri, M, Sudagar, M, and Hosseini, SA. 2011. Effect of water hardness on egg hatchability and larval viability of angelfish Pterophyllum scalare (Schultze, 1823). International Journal of Research in Fisheries and Aquaculture, 1(1): 6-10.	Angelfish	Pterophyllum scalare	No endpoint available
209	Molokwu, CN, and Okpokwasili, GC. 2002. Effects of water hardness on egg hatchability and larval viability of Clarias gariepinus. Aquaculture, 10: 57-64.	African Sharptooth Catfish	Clarias gariepinus	No endpoint available
210	Ofor, CO, and Udeh, H. 2012. Effect of water hardness on fertilisation and hatching success of Clarias gariepinus (Burchell, 1822) and Heterobranchus longifilis Valenciennes, 1840 eggs fertilised with C. gariepinus sperm. Asian Fisheries Science, 25: 270-277.	African Sharptooth Catfish	Clarias gariepinus	No endpoint available
		Vundu	Heterobranchus longifilis
211	Skei, JK, and Dolmen, D. 2006. Effects of pH, aluminium, and soft water on larvae of the amphibians Bufo bufo and Triturus vulgaris. Canadian Journal of Zoology, 84: 1668-1677.	Common Toad	Bufo bufo	No endpoint available
		Smooth Newt	Triturus vulgaris
212	Taghizadeh, V, Imanpour, M, and Jahnbakhashi, A. Effect of water hardness on growth, survival, hematocrit and some blood biochemical indices of Kutum ( Rutilus frisii kutum) fingerlings. Global Veterinaria, 10(1): 22-25.	Kutum	Rutilus frisii kutum	No endpoint available
213	Terra, NR and Feiden, IR. 2003. Reproduction and survival of Daphnia magna Straus, 1820 (Crustacea: Cladocera) under different hardness conditions. Acta Limnologica Brasiliensis, 15(2): 51-55.	Water Flea	Daphina magna	No endpoint available
214	Townsend, CR, Silva, LVF, and Baldisserotto, B. 2003. Growth and survival of Rhamdia quelen (Siluriformes, Pimelodidae) larvae exposed to different levels of water hardness. Aquaculture, 215: 103-108.	Silver Catfish	Rhamdia quelen	No endpoint available
215	Wood, CM, Wilson, RW, Gonzalez, RJ, Patrick, ML, Bergman, HL, Narahara, A, and Val, AL. 1998. Responses of an Amazonian teleost, the tambaqui (Colossoma macropomum), to low pH in extremely soft water. Physiological Zoology, 71(6): 658-670.	Tambaqui	Colossoma macropomum	No endpoint available
216	Al-Daham, NK, and Bhatti, MN. 1977. Salinity tolerance of Gambusia affinis (Baird & Girard) and Heteropneustes fossilis (Bloch). Journal of fish Biology, 11: 309-313.	Mosquitofish	Gambusia affinis	No endpoint available and/or total salinity studied
		Asian Stinging Catfish	Heteropneustes fossilis
217	Mojazi Amiri, B, Baker, DW, Morgan, JD, and Brauner, CJ. 2009. Size dependent early salinity tolerance in two size of juvenile white sturgeon, Acipenser transmontanus. Aquaculture, 286: 121-126.	White Sturgeon	Acipenser transmontanus	No endpoint available and/or total salinity studied
218	Anson, KJ, and Rouse, DB. 1994. Effects of salinity on hatching and post-hatch survival of the Australian red claw catfish Cherax quadricarinatus. Journal of the World Aquaculture Society, 25(2): 277-280.	Australian Red Claw Catfish	Cherax quadricarinatus	No endpoint available and/or total salinity studied
219	Bart, AN, Prasad, B, and Thakur DP. 2013. Effects of incubation water hardness and salinity on egg hatch and fry survival of Nile tilapia Oreochromis niloticus (Linnaeus). Aquaculture Research, 44: 1085-1092. DOI:10.1111/j.1365-2109.2012.03113.x	Nile Tilapia	Oreochromis niloticu	No endpoint available and/or total salinity studied
220	Berezina, N. 2003. Tolerance of freshwater invertebrates to change in water salinity. Russian Journal of Ecology, 34(4): 261-266.	Flat Worms	Turbellaria	No endpoint available and/or total salinity studied
		Oligochaetes	Oligochaeta
		Leeches	Hirudinea
		Mollusks	Mollusca
		Crustaceans	Crustacea
		Caddis Flies	Trichoptera
		Biting Midge	Ceratopogonidae
		Chironomids	Chironomids
221	Beux, LF, and Filho, EZ. 2007. Survival and the growth of pintade (Pseudoplatystoma corruscans) post-larvae on different salinities. Brazilian Archives of Biology and Technology, 50(5): 821-829.	Pintade	Pseudoplatystoma corruscans	No endpoint available and/or total salinity studied
222	Blakeslee, CJ, Galbraith, HS, Robertson, LS, and St. John White, B. 2013. The effects of salinity exposure on multiple life stages of a common freshwater mussel, Elliptio complanata. Environmental Toxicology and Chemistry, 32(12): 2849-2854.	Eastern Elliptio	Elliptio complanata	No endpoint available and/or total salinity studied
223	Burnham, BL, and Peterka, JJ. 1975. Effects of salinity water from North Dakota lakes on survival of fathead minnow (Pimephales promelas) embryos and sac fry. Journal of the Fisheries Research Board of Canada, 32(6): 809-812.	Fathead Minnow	Pimephales promelas	No endpoint available and/or total salinity studied
224	Chen, Q, Sheng, J, Lin, Q, Gao, Y, and Lv, J. 2006. Effect of salinity on reproduction and survival of the copepod Pseudodiaptomus annandalei Sewell, 1919. Aquaculture, 258: 575-582: doi:10.1016/j.aquaculture.2006.04.032	Calanoid Copepod	Pseudodiaptomus annandalei	No endpoint available and/or total salinity studied
225	Chervinski, J. 1983. Salinity tolerance of the mosqito fish, Gambusia affinis (Baird and Girard). Journal of fish Biology, 22: 9-11.	Mosquitofish	Gambusia affinis	No endpoint available and/or total salinity studied
226	Chinathamby, K, Reina, RD, Bailey, PCE, and Lees, BK. 2006. Effects of salinity on the survival, growth and development of tadpoles of the brown tree frog, Litoria ewingii. Australian Journal of Zoology, 54: 97-105. DOI: 10.1071/ZO06006	Brown Tree Frog	Litoria ewingii	No endpoint available and/or total salinity studied
227	Christy, M, and Dickman, CR. Effects of salinity on tadpoles of the green and golden bell frog (Litoria aurea). Amphibia-Reptilia, 23: 1-11.	Green and Golden Bell Frog	Litoria aurea	No endpoint available and/or total salinity studied
228	Puello-Cruz, AC, Velasco-Blanco, G, Martínez-Rodríguez, IE, Felix-Ramos, E, and Voltolina, D. 2010. Growth and survival of Siamese fighting fish, Betta splendens, Larvae at low salinity and with different diets. Journal of the World Aquaculture Society, 41(5) 823-828. DOI: 10.1111/j.1749-7345.2010.00425.x	Siamese Fighting Fish	Betta splendens	No endpoint available and/or total salinity studied
229	Duston, J. 1994. Effect of salinity on survival and growth of Atlantic salmon (Salmo salar) parr and smolts. Aquaculture, 121: 115-124.	Atlantic Salmon	Salmo salar	No endpoint available and/or total salinity studied
230	Ercan, E, and Tarkan, AS. 2014. Effect of salinity on the growth and survival of the freshwater mussel, Unio crassus, in an environmentally disturbed river. Pakistan Journal of Zoology, 46(5): 1399-1406.	Freshwater Mussel	Unio crassus	No endpoint available and/or total salinity studied
231	Faris, AA, and Wooton, RJ. 1987. Effect of water pH and salinity on the survival of eggs and larvae of the euryhaline teleost, Gasterosteus aculeatus L. Environmental Pollution, 48: 49-59.	Teleost	Gasterosteus aculeatus	No endpoint available and/or total salinity studied
232	Galat, DL, Coleman, M, and Robinson, R. 1988. Experimental effects of elevated salinity on three benthic invertebrates in Pyramid Lake, Nevada. Hydrobiologia, 158: 133-144.	Freshwater Scud	Hyalella azteca	No endpoint available and/or total salinity studied
		Klamath Midge	Chironomus utahensis
		Ostracod	Heterocypris sp.
233	Goetsch, PA, and Palmer, CG. 1997. Salinity tolerances of selected macroinvertebrates of the Sabie River, Kruger National Park, South Africa. Archive of Environmental Contamination and Toxicology, 32: 32-41.	Mayfly	Tricorythus sp.	No endpoint available and/or total salinity studied
234	Haage, P. 1968. On the salinity tolerance of eggs and young larvae of Phryganea grandis Linné (Trichoptera). Hydrobiologia, 32(1-2): 257-270.	Caddisfly	Phryganea grandis	No endpoint available and/or total salinity studied
235	Hall, CJ, and Burns, CW. 2001. Effects of salinity and temperature on survival and reproduction of Boeckella hamata (Copepoda: Calanoida) from a periodically brackish lake. Journal of Plankton Research, 23(1): 97-103.	Calanoid Copepod	Boeckella hamata	No endpoint available and/or total salinity studied
236	Hall, CJ, and Burns, CW. 2002. Mortality and growth responses of Daphina carinata to increases in temperature and salinity. Freshwater Biology, 47: 451-458.	Water Flea	Daphnia carinata	No endpoint available and/or total salinity studied
237	Jomori, RK, Luz, RK, and Portella, MC. 2012. Effect of salinity on larval rearing of pacu, Piaractus mesopotamicus, a freshwater species. Journal of the World Aquaculture Society, 43(3): 423-432.	Pacu	Piaractus mesopotamicus	No endpoint available and/or total salinity studied
238	Kane, AS, Bennett, RO, and May, EB. 1990. Effect of hardness and salinity on survival of striped bass larvae. North American Journal of Fisheries Management, 10: 67-71.	Striped Bass	Morone soxatilis	No endpoint available and/or total salinity studied
239	Kearney, BD, Byrne, PG, and Reina, RG. 2012. Larval tolerance to salinity in three species of Australian anuran: An indication of saline specialisation in Litoria aurea .PLOS ONE, 7: 1-6. DOI:10.1371/journal.pone.0043427	Spotter Marsh Frog	Limnodynastes tasmaniensis	No endpoint available and/or total salinity studied
		Painted Burrowing Frog	Neobatrachus sudelli
		Green and Gold Bell Frog	Litoria aurea
240	Kearney, BD, Pell, JR, Byrne, PG, and Reina, RD. 2014. Anuran larval developmental plasticity and survival in response to variable salinity of ecologically relevant timing and magnitude. Journal of Experimental Zoology 321A: 541–549.	Southern brown tree frog	Litoria ewingii	No endpoint available and/or total salinity studied
241	Khanna, N, Cressman III, CPC, Tatara, CP, and Williams, PL. 1997. Tolerance of the nematode Caenorhabditis elegans to pH, salinity and hardness in aquatic media. Archive of Environmental Contamination and Toxicology, 32: 110-114.	Roundworm	Caenorhabditis elegans	No endpoint available and/or total salinity studied
242	Koel, TM, and Peterka, JJ. 1995. Survival to hatching of fishes in sulfate-saline waters, Devils Lake, North Dakota. Canadian Journal of Fisheries and Aquatic Sciences, 52: 464-469.	Walleye	Sander vitreus	No endpoint available and/or total salinity studied
		Northern Pike	Esox lucius
		Yellow Perch	Perca flavescens
243	Kutty, MN, Sukumaran, N, and Kasim, HM. 1980. Influence of temperature and salinity on survival of the freshwater mullet, Rhinomugil corsula (Hamilton). Aquaculture, 20: 261-274.	Freshwater Mullet	Rhinomugil corsula	No endpoint available and/or total salinity studied
244	Mangat, HK, and Hundal, SS. 2014. Salinity tolerance of laboratory reared fingerlings of common carp, Cyprinus carpio (Linn.) during different seasons. International Journal of Advanced Research, 2(11): 491-496.	Common Carp	Cyprinus carpio	No endpoint available and/or total salinity studied
245	Martinez-Palacios, CA., Ross, L.C. and Rosado-Vallado, M., 1990. The effects of salinity on the survival and growth of juvenile Cichlasoma urophthalmus. Aquaculture, 9 1: 65-75.	Mayan Cichlid	Cichlasoma urophthalmus	No endpoint available and/or total salinity studied
246	Matthews, WJ, and Hill, LG. 1977. Tolerance of the red shiner, Notropis lutrensis (Cyprinidae) to environmental parameters. The Southwestern Naturalist, 22: 89-98.	Red Shiner	Notropis lutrensis	No endpoint available and/or total salinity studied
247	Milione, M, Zeng, C. 2008. The effects of temperature and salinity on population growth and egg hatching success of the calanoid copepod, Acartia sinjiensis. Aquaculture, 275: 116-123. DOI:10.1016/j.aquaculture.2007.12.010	Marine Calanoid Copepod	Acartia sinjiensis	No endpoint available and/or total salinity studied
248	Morgan, JD, and Iwama, GK. 1991. Effects of salinity on growth, metabolism, and ion regulation in juvenile rainbow and steelhead trout (Oncorhynchus mykiss) and fall chinook salmon (Oncorhynchus tshawytscha). Canadian Journal of Fisheries Aquatic Sciences, 46: 2083-2094.	Rainbow Trout (freshwater and sea-run)	Oncorhynchus mykiss	No endpoint available and/or total salinity studied
		Chinook Salmon	Oncorhynchus tshawytscha
